# Supplementary material
Source: publisher site journal article supplement (https://www.spandidos-publications.com/3724/downloadSupplementary)
Supplement: Supplementary file 1 [file downloadSupplementary]

## Sheet: Sheet1
Table SIII. Differential analysis and multiple tests for all genes in DLBCL and FL samples.
ID	adj.P.Val	P.value	t	B	logFC	Gene.symbol	Gene.title
206085_s_at	0.000639	1.17e-08	6.34037	8.63675	0.788864	CTH	cystathionine gamma-lyase
217127_at	0.002359	8.63e-08	5.87616	6.9722	1.08806	CTH	cystathionine gamma-lyase
233999_s_at	0.007566	4.15e-07	5.50201	5.66013	1.08616	TTC26	tetratricopeptide repeat domain 26
205194_at	0.015448	1.15e-06	5.25472	4.81101	1.45494	PSPH	phosphoserine phosphatase
223721_s_at	0.015448	1.63e-06	5.16711	4.51409	1.26938	DNAJC12	DnaJ heat shock protein family (Hsp40) member C12
224460_s_at	0.015448	1.82e-06	5.14063	4.42476	0.725988	L2HGDH	L-2-hydroxyglutarate dehydrogenase
226289_at	0.015448	1.98e-06	5.11962	4.35403	0.858485	CAPRIN1	cell cycle associated protein 1
216493_s_at	0.018708	2.74e-06	5.03842	4.08197	1.64553	IGF2BP3	insulin like growth factor 2 mRNA binding protein 3
238427_at	0.019155	3.4e-06	4.98411	3.90109	0.759344	GRPEL2	GrpE like 2, mitochondrial
244819_x_at	0.019155	3.5e-06	4.97639	3.87546	0.566498	PSPH	phosphoserine phosphatase
227197_at	0.021901	4.95e-06	4.88911	3.58695	1.06735	ARHGEF26	Rho guanine nucleotide exchange factor 26
200904_at	0.021901	5.14e-06	-4.87945	3.55519	-0.725094	HLA-E	major histocompatibility complex, class I, E
1568574_x_at	0.021901	5.21e-06	4.87595	3.54368	0.718456	SPP1	secreted phosphoprotein 1
243252_at	0.024612	6.57e-06	4.81664	3.34928	0.857753
220051_at	0.024612	6.75e-06	4.80958	3.32624	0.904601	PRSS21	protease, serine 21
1564746_at	0.026042	7.95e-06	4.76767	3.18972	0.75994	SLC9B2	solute carrier family 9 member B2
211088_s_at	0.026042	8.53e-06	4.74953	3.1308	0.961015	PLK4	polo like kinase 4
214729_at	0.026042	8.82e-06	4.74096	3.10301	0.814887	TWISTNB	TWIST neighbor
209971_x_at	0.026042	9.05e-06	4.73421	3.08114	0.567913	AIMP2	aminoacyl tRNA synthetase complex interacting multifunctional protein 2
219758_at	0.026561	1.01e-05	4.70516	2.98717	0.79386	TTC26	tetratricopeptide repeat domain 26
225632_s_at	0.026561	1.02e-05	-4.70321	2.98091	-0.676227	ISY1-RAB43///RAB43	ISY1-RAB43 readthrough///RAB43, member RAS oncogene family
1559361_at	0.029375	1.18e-05	4.66497	2.85773	0.472143	LOC101927668///MACC1	uncharacterized LOC101927668///metastasis associated in colon cancer 1
1553698_a_at	0.031064	1.31e-05	4.63882	2.77377	0.757228	CCSAP	centriole, cilia and spindle associated protein
213237_at	0.034704	1.52e-05	4.59869	2.64548	0.480126	KNOP1	lysine rich nucleolar protein 1
1566764_at	0.042632	1.95e-05	4.53381	2.43928	1.35906	MACC1	metastasis associated in colon cancer 1
218984_at	0.042686	2.09e-05	4.51496	2.37966	1.01921	PUS7	pseudouridylate synthase 7 (putative)
232151_at	0.042686	2.11e-05	4.51313	2.37388	1.08849	MACC1	metastasis associated in colon cancer 1
212914_at	0.052944	2.71e-05	-4.44622	2.16346	-0.755254	CBX7	chromobox 7
1554743_x_at	0.053076	2.99e-05	4.42013	2.08187	0.429495	PMS1	PMS1 homolog 1, mismatch repair system component
236344_at	0.053076	2.99e-05	-4.41969	2.08052	-0.357385	PDE1C	phosphodiesterase 1C
1557918_s_at	0.053076	3.08e-05	4.41179	2.05586	0.923594	SLC16A1	solute carrier family 16 member 1
223035_s_at	0.053076	3.12e-05	4.40882	2.04659	0.521082	FARSB	phenylalanyl-tRNA synthetase beta subunit
218512_at	0.053076	3.27e-05	4.39644	2.00805	0.614278	WDR12	WD repeat domain 12
240037_at	0.053076	3.3e-05	4.39358	1.99915	0.554077	ITPRIPL1	inositol 1,4,5-trisphosphate receptor interacting protein-like 1
206251_s_at	0.055299	3.62e-05	4.36849	1.92123	0.36013	AVPR1A	arginine vasopressin receptor 1A
209036_s_at	0.055299	3.64e-05	4.36717	1.91713	0.491511	MDH2	malate dehydrogenase 2
206082_at	0.065537	4.61e-05	-4.30352	1.72063	-0.837872	HCP5	HLA complex P5 (non-protein coding)
205705_at	0.065537	4.62e-05	4.30291	1.71875	0.529329	ANKRD26	ankyrin repeat domain 26
218976_at	0.065537	4.81e-05	4.29174	1.68443	1.81173	DNAJC12	DnaJ heat shock protein family (Hsp40) member C12
205023_at	0.065537	5.16e-05	4.2725	1.62548	0.479678	RAD51	RAD51 recombinase
1554452_a_at	0.065537	5.22e-05	4.26971	1.61693	0.75286	HILPDA	hypoxia inducible lipid droplet associated
205706_s_at	0.065537	5.31e-05	4.2651	1.60282	0.634278	ANKRD26	ankyrin repeat domain 26
244463_at	0.065537	5.35e-05	4.26286	1.59598	0.801309	ADAM23	ADAM metallopeptidase domain 23
1555434_a_at	0.065537	5.46e-05	4.25703	1.57816	0.591794	SLC39A14	solute carrier family 39 member 14
235687_at	0.065537	5.47e-05	-4.25694	1.5779	-0.923545	ZNF626	zinc finger protein 626
221224_s_at	0.065537	5.51e-05	4.25458	1.57067	0.439145	DCAKD	dephospho-CoA kinase domain containing
242116_x_at	0.067677	5.87e-05	4.2376	1.51889	0.532887
1553299_at	0.067677	5.94e-05	4.23414	1.50835	0.321663	DUSP5P1	dual specificity phosphatase 5 pseudogene 1
201405_s_at	0.069998	6.31e-05	4.21771	1.45841	0.501989	COPS6	COP9 signalosome subunit 6
207618_s_at	0.069998	6.42e-05	4.21293	1.44389	0.44203	BCS1L	BCS1 homolog, ubiquinol-cytochrome c reductase complex chaperone
201420_s_at	0.069998	6.64e-05	4.20361	1.41559	0.539708	WDR77	WD repeat domain 77
229896_at	0.069998	6.66e-05	4.2029	1.41344	0.780005	LOC101926943	uncharacterized LOC101926943
200807_s_at	0.073653	7.19e-05	4.18163	1.34908	0.62458	HSPD1	heat shock protein family D (Hsp60) member 1
200806_s_at	0.073653	7.39e-05	4.17406	1.3262	0.840194	HSPD1	heat shock protein family D (Hsp60) member 1
239410_at	0.073653	7.41e-05	4.1734	1.32422	0.570697	HK2	hexokinase 2
207495_at	0.074919	7.67e-05	4.16371	1.29498	0.625575	RAB28	RAB28, member RAS oncogene family
202138_x_at	0.075326	7.85e-05	4.15731	1.27571	0.507704	AIMP2	aminoacyl tRNA synthetase complex interacting multifunctional protein 2
240947_at	0.07552	8.23e-05	4.14446	1.23703	0.394646	ANO6	anoctamin 6
202524_s_at	0.07552	8.28e-05	-4.14264	1.23157	-1.128	SPOCK2	sparc/osteonectin, cwcv and kazal-like domains proteoglycan (testican) 2
224795_x_at	0.07552	8.31e-05	-4.1417	1.22873	-1.46119	IGK///IGKC	immunoglobulin kappa locus///immunoglobulin kappa constant
229370_at	0.07552	8.43e-05	4.1378	1.21703	0.59503
234040_at	0.075677	8.58e-05	4.13271	1.20175	0.467336	HELLS	helicase, lymphoid-specific
206112_at	0.079889	9.21e-05	4.1132	1.14327	0.463196	ANKRD7	ankyrin repeat domain 7
221671_x_at	0.085527	0.0001	-4.08978	1.07333	-1.45841	IGK///IGKC	immunoglobulin kappa locus///immunoglobulin kappa constant
1560916_a_at	0.085963	0.000102	4.08402	1.05618	0.831492	DPY19L1	dpy-19 like 1
213647_at	0.086578	0.000105	4.07776	1.03753	0.867249	DNA2	DNA replication helicase/nuclease 2
219371_s_at	0.08696	0.000108	-4.06739	1.00669	-1.08043	KLF2	Kruppel like factor 2
219953_s_at	0.08696	0.000109	4.06629	1.00342	0.610148	AKIP1	A-kinase interacting protein 1
1554264_at	0.08696	0.00011	4.06384	0.99616	0.370635	CKAP2	cytoskeleton associated protein 2
203626_s_at	0.08696	0.000111	4.06003	0.98485	0.807431	SKP2	S-phase kinase-associated protein 2, E3 ubiquitin protein ligase
212115_at	0.087023	0.000114	4.05454	0.96855	0.363638	HN1L	hematological and neurological expressed 1 like
209713_s_at	0.087023	0.000115	4.05192	0.96079	0.626847	SLC35D1	solute carrier family 35 member D1
208758_at	0.088772	0.000119	4.04245	0.93274	0.507425	ATIC	5-aminoimidazole-4-carboxamide ribonucleotide formyltransferase/IMP cyclohydrolase
218504_at	0.092915	0.000126	4.02578	0.88343	0.657715	FAHD2A	fumarylacetoacetate hydrolase domain containing 2A
200658_s_at	0.093102	0.000128	4.02142	0.87059	0.48812	PHB	prohibitin
226285_at	0.097352	0.000135	4.00507	0.82241	0.654597	CAPRIN1	cell cycle associated protein 1
223868_s_at	0.102882	0.000146	3.98359	0.75931	0.540018	WWOX	WW domain containing oxidoreductase
214144_at	0.102882	0.000147	3.98132	0.75263	0.575683	POLR2D	RNA polymerase II subunit D
243244_at	0.102882	0.000149	3.97845	0.74423	0.562713	CACNB4	calcium voltage-gated channel auxiliary subunit beta 4
201013_s_at	0.105644	0.000158	3.96132	0.69409	0.744421	PAICS	phosphoribosylaminoimidazole carboxylase; phosphoribosylaminoimidazolesuccinocarboxamide synthase
229491_at	0.105644	0.00016	3.95772	0.68359	0.854899	SLC9B2	solute carrier family 9 member B2
1558762_a_at	0.105644	0.000162	3.95324	0.67049	0.554589	ZNF789	zinc finger protein 789
1557765_at	0.105644	0.000163	3.95214	0.66727	0.468133	LINC01021	long intergenic non-protein coding RNA 1021
1554084_a_at	0.105644	0.000164	3.95026	0.66182	0.683706	NOL9	nucleolar protein 9
1554082_a_at	0.105644	0.000168	3.94436	0.6446	0.970295	NOL9	nucleolar protein 9
218312_s_at	0.105644	0.00017	-3.94109	0.63508	-0.719422	ZSCAN18	zinc finger and SCAN domain containing 18
222056_s_at	0.105644	0.00017	3.94001	0.63194	0.569361	FAHD2A	fumarylacetoacetate hydrolase domain containing 2A
201267_s_at	0.105644	0.000172	3.9371	0.62344	0.550179	PSMC3	proteasome 26S subunit, ATPase 3
221651_x_at	0.105644	0.000172	-3.93697	0.62308	-1.41869	IGK///IGKC	immunoglobulin kappa locus///immunoglobulin kappa constant
231943_at	0.109985	0.000181	-3.92226	0.58031	-0.762272	ZFP28	ZFP28 zinc finger protein
200978_at	0.115575	0.000192	3.90489	0.52992	0.47821	MDH1	malate dehydrogenase 1
217593_at	0.116709	0.000196	-3.89894	0.51273	-0.814175	ZSCAN18	zinc finger and SCAN domain containing 18
1555772_a_at	0.118573	0.000206	3.8853	0.47329	1.24478	CDC25A	cell division cycle 25A
233058_at	0.118573	0.000208	3.88287	0.46627	0.38597	GPSM2	G-protein signaling modulator 2
201421_s_at	0.118573	0.000208	3.8823	0.46464	0.407324	WDR77	WD repeat domain 77
1554890_a_at	0.118573	0.000208	3.88214	0.4642	0.683186	TIA1	TIA1 cytotoxic granule-associated RNA binding protein
244229_at	0.120754	0.000214	-3.87391	0.44045	-0.706542	PARVG	parvin gamma
229331_at	0.121729	0.000221	3.86435	0.41295	0.732515	SPATA18	spermatogenesis associated 18
232253_at	0.121729	0.000222	-3.86382	0.41142	-0.475544	C5orf56	chromosome 5 open reading frame 56
207892_at	0.121729	0.000223	-3.8628	0.40847	-0.623417	CD40LG	CD40 ligand
1566766_a_at	0.123143	0.000228	3.85601	0.38898	0.739797	MACC1	metastasis associated in colon cancer 1
222118_at	0.123143	0.00023	3.85373	0.38243	0.864806	CENPN	centromere protein N
218343_s_at	0.123305	0.000232	3.85046	0.37304	0.483808	GTF3C3	general transcription factor IIIC subunit 3
236875_at	0.123305	0.000235	3.84774	0.36522	0.52682	LOC100130705	uncharacterized LOC100130705
237968_at	0.123662	0.000239	3.84195	0.34863	0.630829	ATL2	atlastin GTPase 2
238808_at	0.123662	0.00024	3.84138	0.34701	0.424851	HOXA13	homeobox A13
214669_x_at	0.124585	0.000247	-3.83274	0.32226	-1.39774	IGKC	immunoglobulin kappa constant
242515_x_at	0.124585	0.000248	3.83193	0.31995	0.531903	AKIP1	A-kinase interacting protein 1
209770_at	0.124585	0.000248	-3.83113	0.31767	-0.682185	BTN3A1	butyrophilin subfamily 3 member A1
243509_at	0.125804	0.000253	-3.82565	0.302	-1.20062
215293_s_at	0.132627	0.000271	3.80628	0.24676	0.380042	PGAP2	post-GPI attachment to proteins 2
1555281_x_at	0.132627	0.000272	3.80504	0.24322	0.760215	ARMC8	armadillo repeat containing 8
218122_s_at	0.134043	0.000282	3.79384	0.21137	0.519315	SENP2	SUMO1/sentrin/SMT3 specific peptidase 2
232815_at	0.134043	0.000284	3.79217	0.20661	0.501995	FBXO3	F-box protein 3
234767_at	0.134043	0.000284	3.79206	0.20629	0.38963
225291_at	0.134043	0.000284	3.79171	0.2053	0.609107	PNPT1	polyribonucleotide nucleotidyltransferase 1
241687_at	0.134427	0.000288	3.78836	0.19581	0.444568	WDR12	WD repeat domain 12
235588_at	0.1349	0.000291	3.78485	0.18584	0.661051	ESCO2	establishment of sister chromatid cohesion N-acetyltransferase 2
219387_at	0.137376	0.000299	3.77706	0.16375	0.846861	CCDC88A	coiled-coil domain containing 88A
204884_s_at	0.138713	0.000307	3.76888	0.14059	0.428037	HUS1	HUS1 checkpoint clamp component
229462_at	0.138713	0.000312	3.7649	0.12932	0.288282	CAAP1	caspase activity and apoptosis inhibitor 1
235773_at	0.138713	0.000312	-3.7647	0.12878	-0.833389	ZIK1	zinc finger protein interacting with K protein 1
235689_at	0.138713	0.000312	3.76454	0.12831	0.703568	MTFMT	mitochondrial methionyl-tRNA formyltransferase
40446_at	0.145232	0.000329	-3.74867	0.08352	-0.524529	PHF1	PHD finger protein 1
238748_at	0.146409	0.000335	3.74394	0.07018	0.327159	RAD18	RAD18, E3 ubiquitin protein ligase
211194_s_at	0.147626	0.00034	3.73915	0.05671	1.05612	TP63	tumor protein p63
1555279_at	0.148062	0.000346	3.73431	0.04309	0.736764	ARMC8	armadillo repeat containing 8
212092_at	0.148062	0.000349	3.73205	0.03673	1.22473	PEG10	paternally expressed 10
218639_s_at	0.148062	0.000349	-3.73135	0.03477	-0.451208	ZXDC	ZXD family zinc finger C
227405_s_at	0.150229	0.000357	-3.72478	0.01633	-0.542643	MIR4683///FZD8	microRNA 4683///frizzled class receptor 8
214999_s_at	0.152185	0.000368	3.71618	-0.00779	0.346741	RAB11FIP3	RAB11 family interacting protein 3
203752_s_at	0.152185	0.000369	-3.715	-0.01111	-0.510742	JUND	JunD proto-oncogene, AP-1 transcription factor subunit
34449_at	0.152185	0.000372	3.71298	-0.01676	0.979331	CASP2	caspase 2
224367_at	0.152185	0.000373	-3.71201	-0.01949	-1.65141	BEX2	brain expressed X-linked 2
219418_at	0.152597	0.000377	3.70901	-0.02789	0.337106	SLC23A3///NHEJ1	solute carrier family 23 member 3///non-homologous end joining factor 1
204728_s_at	0.153379	0.000382	3.70531	-0.03824	0.781192	WDHD1	WD repeat and HMG-box DNA binding protein 1
221770_at	0.158953	0.000398	3.69256	-0.07386	0.677765	RPE	ribulose-5-phosphate-3-epimerase
1553683_s_at	0.160378	0.000405	-3.68771	-0.08739	-0.392107	FBXL14	F-box and leucine rich repeat protein 14
208382_s_at	0.160378	0.000409	3.68493	-0.09514	0.548711	DMC1	DNA meiotic recombinase 1
203905_at	0.160378	0.000411	3.68347	-0.09918	0.651363	PARN	poly(A)-specific ribonuclease
1556348_at	0.165422	0.000427	3.67215	-0.13071	0.777242	HEATR1	HEAT repeat containing 1
223996_s_at	0.166491	0.000432	3.66812	-0.14188	0.635825	MRPL30	mitochondrial ribosomal protein L30
210567_s_at	0.168011	0.000441	3.66207	-0.1587	0.885244	SKP2	S-phase kinase-associated protein 2, E3 ubiquitin protein ligase
200992_at	0.168011	0.000443	3.66119	-0.16112	0.561201	IPO7	importin 7
235949_at	0.168011	0.000446	3.65918	-0.1667	0.720012	TTC26	tetratricopeptide repeat domain 26
214836_x_at	0.169934	0.000454	-3.65358	-0.18224	-1.3319	IGK///IGKC	immunoglobulin kappa locus///immunoglobulin kappa constant
216556_x_at	0.169934	0.000458	3.65098	-0.18944	0.35302
223642_at	0.169934	0.00046	3.64967	-0.19306	0.564874	ZIC2	Zic family member 2
224194_at	0.170789	0.000467	-3.64498	-0.20604	-0.425763	FCRL2	Fc receptor like 2
214216_s_at	0.170789	0.000469	3.64415	-0.20832	0.702168	LARP4B	La ribonucleoprotein domain family member 4B
209247_s_at	0.171751	0.000474	3.64048	-0.21846	0.409919	ABCF2	ATP binding cassette subfamily F member 2
229629_at	0.172395	0.000479	-3.63739	-0.22702	-0.893414
215967_s_at	0.172461	0.000484	-3.63423	-0.23574	-0.926924	LY9	lymphocyte antigen 9
238075_at	0.172461	0.000487	3.63249	-0.24054	0.86452	CHEK1	checkpoint kinase 1
207117_at	0.172461	0.000489	3.63142	-0.2435	0.520781	ZNF117	zinc finger protein 117
216111_x_at	0.176652	0.000509	3.6196	-0.27606	0.473041	PMS2P3	PMS1 homolog 2, mismatch repair system component pseudogene 3
1553510_s_at	0.176652	0.00051	3.61877	-0.27835	0.483452	CNOT9	CCR4-NOT transcription complex subunit 9
1557177_at	0.176652	0.000512	3.6173	-0.28238	0.601754	LOC100506258	uncharacterized LOC100506258
208761_s_at	0.176652	0.000516	3.61535	-0.28776	0.375719	SUMO1	small ubiquitin-like modifier 1
242597_at	0.176652	0.000517	-3.61468	-0.2896	-0.345303	ZMYM2	zinc finger MYM-type containing 2
1554283_at	0.185583	0.000549	3.59666	-0.33906	0.448318	NOCT	nocturnin
230444_at	0.185583	0.000551	-3.59521	-0.34303	-0.758906	PDE7A	phosphodiesterase 7A
200756_x_at	0.185583	0.000563	3.58916	-0.35962	0.484727	CALU	calumenin
203664_s_at	0.185583	0.000563	3.58886	-0.36043	0.51667	POLR2D	RNA polymerase II subunit D
215728_s_at	0.185583	0.000566	3.58739	-0.36444	0.458526	ACOT7	acyl-CoA thioesterase 7
224036_s_at	0.185583	0.000568	3.58621	-0.36768	0.441492	LMBR1	limb development membrane protein 1
1565867_a_at	0.185583	0.000571	3.58464	-0.37196	0.383365	LOC441155///ZC3H11A	zinc finger CCCH-type domain-containing-like///zinc finger CCCH-type containing 11A
211814_s_at	0.185583	0.000577	3.5813	-0.38109	1.11682	CCNE2	cyclin E2
213233_s_at	0.185583	0.000578	-3.58127	-0.38119	-0.539187	KLHL9	kelch like family member 9
210061_at	0.185583	0.000579	3.58044	-0.38345	0.704384	ZNF589	zinc finger protein 589
229164_s_at	0.185583	0.00058	-3.57976	-0.3853	-0.442265	ABTB1	ankyrin repeat and BTB domain containing 1
242584_at	0.186562	0.000587	3.57641	-0.39446	0.789707	FAM161A	family with sequence similarity 161 member A
200886_s_at	0.187815	0.000597	3.57104	-0.40911	0.366142	PGAM1	phosphoglycerate mutase 1
222604_at	0.187815	0.000601	3.56918	-0.41418	0.564052	GTF3C3	general transcription factor IIIC subunit 3
201764_at	0.187815	0.000601	3.56914	-0.41427	0.661207	TMEM106C	transmembrane protein 106C
1552680_a_at	0.190293	0.000613	3.56344	-0.4298	0.561387	KNL1	kinetochore scaffold 1
212949_at	0.191463	0.00062	3.55987	-0.43954	0.827207	NCAPH	non-SMC condensin I complex subunit H
231772_x_at	0.191614	0.000624	3.55792	-0.44485	0.837383	CENPH	centromere protein H
223545_at	0.192525	0.00063	3.55478	-0.45339	0.464727	FANCD2	Fanconi anemia complementation group D2
1555852_at	0.193054	0.000639	-3.55058	-0.46478	-0.623978	PSMB8-AS1	PSMB8 antisense RNA 1 (head to head)
224173_s_at	0.193054	0.000639	3.55057	-0.46482	0.961475	MRPL30	mitochondrial ribosomal protein L30
201068_s_at	0.193214	0.000646	3.54745	-0.47329	0.394553	PSMC2	proteasome 26S subunit, ATPase 2
1554883_a_at	0.193214	0.000649	3.54572	-0.47799	0.817536	ERCC8	ERCC excision repair 8, CSA ubiquitin ligase complex subunit
242984_at	0.193214	0.00065	3.54531	-0.47908	0.651019	MKLN1	muskelin 1
200772_x_at	0.200714	0.00068	3.53172	-0.51591	0.480732	LOC100506248///MIR1244-2///MIR1244-3///MIR1244-1///LOC728026///PTMA	prothymosin alpha///microRNA 1244-2///microRNA 1244-3///microRNA 1244-1///prothymosin alpha-like///prothymosin, alpha
207628_s_at	0.200714	0.000685	3.52959	-0.52167	0.371288	WBSCR22	Williams-Beuren syndrome chromosome region 22
203517_at	0.200714	0.000686	3.52879	-0.52385	0.521243	MTX2	metaxin 2
223413_s_at	0.201896	0.000694	3.52537	-0.5331	0.512555	LYAR	Ly1 antibody reactive
41858_at	0.202501	0.0007	3.52283	-0.53994	0.520604	PGAP2	post-GPI attachment to proteins 2
205648_at	0.205555	0.000715	3.51645	-0.55716	0.856833	WNT2	Wnt family member 2
206190_at	0.205555	0.000718	3.51504	-0.56097	0.522665	GPR17	G protein-coupled receptor 17
224781_s_at	0.207008	0.000727	3.51129	-0.57109	0.345775	RBM17	RNA binding motif protein 17
235796_at	0.210245	0.000742	-3.50494	-0.58817	-0.502984
205687_at	0.210599	0.000747	3.50285	-0.59381	0.596292	UBFD1	ubiquitin family domain containing 1
238952_x_at	0.210856	0.000753	-3.50043	-0.60031	-0.731315	ZNF829	zinc finger protein 829
1561853_a_at	0.210856	0.000756	3.49933	-0.60328	0.562913	IL23R	interleukin 23 receptor
222506_at	0.211119	0.000762	3.49682	-0.61001	0.508713	LMBR1	limb development membrane protein 1
238859_at	0.211119	0.000765	3.49583	-0.61267	0.427865	FAM149B1	family with sequence similarity 149 member B1
230919_at	0.211513	0.00077	-3.49371	-0.61837	-0.313593	ZNF233	zinc finger protein 233
208905_at	0.21187	0.00078	3.48976	-0.62896	0.44723	CYCS	cytochrome c, somatic
240143_at	0.21187	0.000781	3.48917	-0.63056	0.675069
218552_at	0.21187	0.000784	-3.48817	-0.63324	-0.565353	ECHDC2	enoyl-CoA hydratase domain containing 2
226882_x_at	0.21187	0.00079	3.48561	-0.64011	0.677483	WDR4	WD repeat domain 4
221875_x_at	0.21187	0.000793	-3.48476	-0.64238	-0.419911	HLA-F	major histocompatibility complex, class I, F
201014_s_at	0.21187	0.000797	3.4832	-0.64658	0.72414	PAICS	phosphoribosylaminoimidazole carboxylase; phosphoribosylaminoimidazolesuccinocarboxamide synthase
226649_at	0.21187	0.000798	3.48257	-0.64825	0.8106	PANK1	pantothenate kinase 1
222678_s_at	0.213628	0.000809	3.47854	-0.65905	0.625052	DCUN1D1	defective in cullin neddylation 1 domain containing 1
223506_at	0.21412	0.000819	3.47486	-0.66888	0.508922	ZC3H8	zinc finger CCCH-type containing 8
223714_at	0.21412	0.000823	-3.47323	-0.67325	-0.876539	ZNF256	zinc finger protein 256
217597_x_at	0.21412	0.000823	-3.47313	-0.67351	-0.407225	RAB40B	RAB40B, member RAS oncogene family
235124_at	0.21412	0.000835	-3.46856	-0.68574	-0.477154	EIF3J-AS1	EIF3J antisense RNA 1 (head to head)
1559307_s_at	0.21412	0.000839	3.46739	-0.68885	0.467315	RBL1	RB transcriptional corepressor like 1
235785_at	0.21412	0.000841	3.46666	-0.6908	0.46107
237215_s_at	0.21412	0.000844	3.46558	-0.69369	1.43414	TFRC	transferrin receptor
221079_s_at	0.21412	0.000847	3.46424	-0.69727	0.767532	METTL2A///METTL2B	methyltransferase like 2A///methyltransferase like 2B
215820_x_at	0.21412	0.000849	3.46376	-0.69855	0.588449	SNX13	sorting nexin 13
224443_at	0.21412	0.000852	3.46243	-0.70211	0.875515	LINC00467	long intergenic non-protein coding RNA 467
229061_s_at	0.21412	0.000865	3.45774	-0.71461	0.639981	SLC25A13	solute carrier family 25 member 13
1558000_at	0.21412	0.000867	3.45709	-0.71634	0.213712	ARID5B	AT-rich interaction domain 5B
219997_s_at	0.21412	0.000872	3.45533	-0.72102	0.439375	COPS7B	COP9 signalosome subunit 7B
209254_at	0.21412	0.000873	3.45511	-0.72161	0.423786	KLHDC10	kelch domain containing 10
204279_at	0.21412	0.000874	-3.45467	-0.72279	-0.512419	PSMB9	proteasome subunit beta 9
207900_at	0.21412	0.000875	-3.45432	-0.72372	-1.2533	CCL17	C-C motif chemokine ligand 17
201115_at	0.21412	0.000877	3.45348	-0.72597	0.502841	POLD2	DAN polymerase delta 2, accessory subunit
213292_s_at	0.214433	0.000885	3.45088	-0.73287	0.46201	SNX13	sorting nexin 13
1553138_a_at	0.214433	0.000888	3.44979	-0.73578	0.670139	ANKLE1	ankyrin repeat and LEM domain containing 1
212379_at	0.214433	0.000892	3.44821	-0.73997	0.553122	GART	phosphoribosylglycinamide formyltransferase, phosphoribosylglycinamide synthetase, phosphoribosylaminoimidazole synthetase
210165_at	0.214433	0.000895	3.44736	-0.74225	0.390314	DNASE1	deoxyribonuclease 1
216894_x_at	0.214433	0.000898	-3.44619	-0.74535	-0.489827	CDKN1C	cyclin dependent kinase inhibitor 1C
217777_s_at	0.216683	0.000912	3.44161	-0.75753	0.77471	HACD3	3-hydroxyacyl-CoA dehydratase 3
213932_x_at	0.216921	0.000917	-3.4397	-0.7626	-0.280307	HLA-A	major histocompatibility complex, class I, A
240070_at	0.216921	0.000926	-3.43676	-0.77041	-0.706903	TIGIT	T-cell immunoreceptor with Ig and ITIM domains
238464_at	0.216921	0.000926	3.43661	-0.77081	0.393107	ANKRD36	ankyrin repeat domain 36
232546_at	0.216921	0.000928	3.43592	-0.77263	0.597314	TP73	tumor protein p73
1552643_at	0.217221	0.000934	-3.43417	-0.77728	-0.728279	ZNF626	zinc finger protein 626
200650_s_at	0.218866	0.000945	3.43051	-0.78698	0.498391	LDHA	lactate dehydrogenase A
237105_at	0.22018	0.000954	3.42734	-0.79539	0.440132	LOC101927027	uncharacterized LOC101927027
239462_at	0.220287	0.00096	-3.42561	-0.79996	-0.514896	ZNF284	zinc finger protein 284
201010_s_at	0.220287	0.000963	-3.42458	-0.8027	-0.669578	TXNIP	thioredoxin interacting protein
215509_s_at	0.22046	0.000968	3.42303	-0.80679	1.07345	BUB1	BUB1 mitotic checkpoint serine/threonine kinase
237065_s_at	0.220856	0.000974	3.42107	-0.81197	0.445061	LAMTOR5-AS1	LAMTOR5 antisense RNA 1
210868_s_at	0.220856	0.00098	3.41905	-0.81731	0.367263	ELOVL6	ELOVL fatty acid elongase 6
200994_at	0.220856	0.000985	3.41752	-0.82137	0.573752	IPO7	importin 7
219080_s_at	0.220856	0.00099	3.41601	-0.82535	0.964281	CTPS2	CTP synthase 2
235425_at	0.220856	0.000991	3.41554	-0.82661	0.78088	SGO2	shugoshin 2
222732_at	0.220856	0.000994	-3.41479	-0.82858	-0.375135	TRIM39-RPP21///TRIM39	TRIM39-RPP21 readthrough///tripartite motif containing 39
211765_x_at	0.221443	0.001	3.4127	-0.8341	0.206417	PPIA	peptidylprolyl isomerase A
203696_s_at	0.222778	0.00101	3.4085	-0.8452	0.643516	RFC2	replication factor C subunit 2
206439_at	0.222778	0.00102	3.40618	-0.85131	0.81045	EPYC	epiphycan
1555004_a_at	0.222778	0.00102	3.40547	-0.85319	0.706843	RBL1	RB transcriptional corepressor like 1
218133_s_at	0.222778	0.00103	3.40442	-0.85594	0.361723	NIF3L1	NGG1 interacting factor 3 like 1
1554575_a_at	0.222778	0.00103	3.40344	-0.85853	0.753207	BPNT1	3'(2'), 5'-bisphosphate nucleotidase 1
1569190_at	0.222778	0.00103	3.40272	-0.86044	0.795319	LOC101927137///SCLT1	uncharacterized LOC101927137///sodium channel and clathrin linker 1
225730_s_at	0.222778	0.00104	3.40204	-0.86222	0.553474	THUMPD3	THUMP domain containing 3
222962_s_at	0.222778	0.00104	3.40089	-0.86526	0.870674	MCM10	minichromosome maintenance 10 replication initiation factor
205047_s_at	0.223134	0.00104	3.39916	-0.86979	0.642905	ASNS	asparagine synthetase (glutamine-hydrolyzing)
222132_s_at	0.223462	0.00105	3.39641	-0.87705	0.444076	AGK	acylglycerol kinase
209645_s_at	0.223462	0.00105	3.39627	-0.8774	0.463059	ALDH1B1	aldehyde dehydrogenase 1 family member B1
1554217_a_at	0.223664	0.00106	3.39478	-0.88133	0.620391	VPS50	VPS50, EARP/GARPII complex subunit
213599_at	0.223834	0.00106	3.39334	-0.88512	0.989731	OIP5	Opa interacting protein 5
217786_at	0.224662	0.00107	3.39048	-0.89264	0.443974	PRMT5	protein arginine methyltransferase 5
235694_at	0.224662	0.00108	3.38917	-0.89607	0.554345	TCFL5	transcription factor like 5
213535_s_at	0.224662	0.00109	3.38569	-0.90523	0.3121	UBE2I	ubiquitin conjugating enzyme E2 I
227985_at	0.224662	0.00109	3.38469	-0.90786	1.29983	LOC100506098	uncharacterized LOC100506098
201577_at	0.224662	0.0011	3.38373	-0.91038	0.63708	NME1	NME/NM23 nucleoside diphosphate kinase 1
211212_s_at	0.224662	0.0011	3.38331	-0.91147	0.692118	ORC5	origin recognition complex subunit 5
201725_at	0.224662	0.0011	3.38287	-0.91263	0.313245	CDC123	cell division cycle 123
226332_at	0.224662	0.0011	3.3827	-0.91307	0.376886	FAM133DP///FAM133B	family with sequence similarity 133, member A pseudogene///family with sequence similarity 133 member B
229271_x_at	0.224807	0.00111	3.38133	-0.91666	0.257822	COL11A1	collagen type XI alpha 1 chain
229178_at	0.224967	0.00111	3.37995	-0.9203	0.667157	PRTG	protogenin
211005_at	0.225065	0.00112	-3.37865	-0.92369	-0.835983	LAT	linker for activation of T-cells
217850_at	0.226652	0.00113	3.37389	-0.93616	0.418244	SNORD19B///GNL3	small nucleolar RNA, C/D box 19B///G protein nucleolar 3
227161_at	0.226652	0.00113	3.37362	-0.93688	0.795979	NOM1	nucleolar protein with MIF4G domain 1
203622_s_at	0.226652	0.00114	3.37264	-0.93945	0.478796	PNO1	partner of NOB1 homolog
1565817_at	0.226652	0.00114	3.37131	-0.94292	0.529978	IKZF1	IKAROS family zinc finger 1
220200_s_at	0.226652	0.00114	3.37071	-0.94449	0.486272	KMT5A	lysine methyltransferase 5A
203095_at	0.231822	0.00117	3.36249	-0.96599	0.458725	MTIF2	mitochondrial translational initiation factor 2
224410_s_at	0.233359	0.00119	3.35927	-0.97438	0.910396	LMBR1	limb development membrane protein 1
211462_s_at	0.233455	0.00119	3.35801	-0.97767	0.542468	TBL1Y	transducin (beta)-like 1, Y-linked
208693_s_at	0.233738	0.0012	3.35651	-0.9816	0.486228	GARS	glycyl-tRNA synthetase
223625_at	0.233801	0.00121	3.35204	-0.99326	0.598067	FAM126A	family with sequence similarity 126 member A
239253_at	0.233801	0.00122	3.35011	-0.99827	0.640678
222130_s_at	0.233801	0.00122	3.34939	-1.00014	0.383601	MRM2	mitochondrial rRNA methyltransferase 2
1552619_a_at	0.233801	0.00123	3.34917	-1.00072	0.961193	ANLN	anillin actin binding protein
228143_at	0.233801	0.00123	-3.34858	-1.00226	-1.14173	CP	ceruloplasmin (ferroxidase)
216228_s_at	0.233801	0.00124	3.34645	-1.0078	0.804467	WDHD1	WD repeat and HMG-box DNA binding protein 1
218593_at	0.233801	0.00124	3.34552	-1.01024	0.506291	RBM28	RNA binding motif protein 28
217754_at	0.233801	0.00124	3.34493	-1.01177	0.413924	DDX56	DEAD-box helicase 56
201293_x_at	0.233801	0.00124	3.34478	-1.01216	0.20394	LOC101060363///PPIA	peptidyl-prolyl cis-trans isomerase A pseudogene///peptidylprolyl isomerase A
1564883_a_at	0.233801	0.00125	3.34363	-1.01516	0.583574	TAS1R1	taste 1 receptor member 1
229666_s_at	0.233801	0.00125	3.34265	-1.0177	0.558967	CSTF3	cleavage stimulation factor subunit 3
1553679_s_at	0.233801	0.00125	3.34258	-1.01788	0.613793	VKORC1L1	vitamin K epoxide reductase complex subunit 1 like 1
244171_at	0.233801	0.00125	3.34212	-1.01909	0.517104	MKLN1	muskelin 1
220865_s_at	0.238987	0.00129	3.33403	-1.04009	0.668003	PDSS1	prenyl (decaprenyl) diphosphate synthase, subunit 1
1560754_at	0.238987	0.00129	-3.33286	-1.04314	-0.651342	CMTM7	CKLF like MARVEL transmembrane domain containing 7
225614_at	0.238987	0.00129	3.33196	-1.04547	0.591922	SAAL1	serum amyloid A like 1
220549_at	0.239224	0.0013	3.33058	-1.04905	0.314969	FSBP///RAD54B	fibrinogen silencer binding protein///RAD54 homolog B (S. cerevisiae)
241379_at	0.239344	0.00131	3.32839	-1.05473	0.509582	APLF	aprataxin and PNKP like factor
226319_s_at	0.239344	0.00131	3.32821	-1.0552	0.855463	ALYREF	Aly/REF export factor
214473_x_at	0.239344	0.00131	3.32701	-1.05832	0.425952	PMS2P3	PMS1 homolog 2, mismatch repair system component pseudogene 3
202483_s_at	0.239344	0.00132	3.32619	-1.06044	0.495472	RANBP1	RAN binding protein 1
204003_s_at	0.239535	0.00133	3.32398	-1.06616	0.413987	NUPL2	nucleoporin like 2
208897_s_at	0.239535	0.00133	3.32384	-1.06653	0.443131	DDX18	DEAD-box helicase 18
212789_at	0.240571	0.00134	3.3213	-1.0731	0.496156	NCAPD3	non-SMC condensin II complex subunit D3
203578_s_at	0.240571	0.00134	3.32039	-1.07547	0.825454	SLC7A6	solute carrier family 7 member 6
226841_at	0.241272	0.00135	-3.31843	-1.08054	-0.930155	MPEG1	macrophage expressed 1
204265_s_at	0.242344	0.00136	-3.31599	-1.08686	-0.586463	GPSM3	G-protein signaling modulator 3
209812_x_at	0.242434	0.00137	3.31376	-1.0926	0.543637	CASP2	caspase 2
213539_at	0.242434	0.00137	-3.31273	-1.09526	-0.838844	CD3D	CD3d molecule
228280_at	0.242434	0.00138	3.31154	-1.09834	0.986278	ZC3HAV1L	zinc finger CCCH-type containing, antiviral 1 like
202236_s_at	0.242434	0.00138	3.31143	-1.09864	0.915925	SLC16A1	solute carrier family 16 member 1
204128_s_at	0.242434	0.00139	3.31008	-1.10213	1.03245	RFC3	replication factor C subunit 3
212661_x_at	0.242434	0.00139	3.30972	-1.10304	0.195775	LOC101060363///PPIA	peptidyl-prolyl cis-trans isomerase A pseudogene///peptidylprolyl isomerase A
227431_at	0.242535	0.00139	3.30858	-1.106	0.545024	APTR	Alu-mediated CDKN1A/p21 transcriptional regulator (non-protein coding)
1553603_s_at	0.243346	0.00141	3.3058	-1.11317	0.672132	ATL2	atlastin GTPase 2
236280_at	0.243346	0.00141	-3.30393	-1.118	-0.854986	P2RY10	purinergic receptor P2Y10
231786_at	0.243346	0.00141	3.30386	-1.11816	0.487773	HOXA13	homeobox A13
243529_at	0.243346	0.00142	3.3035	-1.11911	0.630266	MARS2	methionyl-tRNA synthetase 2, mitochondrial
206788_s_at	0.244039	0.00142	3.30159	-1.12402	0.85964	CBFB	core-binding factor beta subunit
236028_at	0.245894	0.00144	3.29818	-1.1328	0.50453	IBSP	integrin binding sialoprotein
215947_s_at	0.246224	0.00145	3.29677	-1.13646	0.419521	LOC100287852///FAM136A	protein FAM136A pseudogene///family with sequence similarity 136 member A
212529_at	0.246737	0.00145	3.29511	-1.14071	0.66905	LSM12	LSM12 homolog
219266_at	0.249219	0.00147	-3.29093	-1.15146	-0.60995	ZNF350	zinc finger protein 350
212619_at	0.250181	0.00148	3.28872	-1.15715	0.835882	NEMP1	nuclear envelope integral membrane protein 1
211576_s_at	0.251126	0.00149	3.28653	-1.16277	0.447868	SLC19A1	solute carrier family 19 member 1
222773_s_at	0.251949	0.00151	3.28278	-1.17242	0.605269	GALNT12	polypeptide N-acetylgalactosaminyltransferase 12
232881_at	0.251949	0.00151	3.28267	-1.1727	0.337446	GNAS-AS1	GNAS antisense RNA 1
218356_at	0.251949	0.00151	3.28256	-1.17298	0.445344	MRM2	mitochondrial rRNA methyltransferase 2
1554742_at	0.252168	0.00152	3.28085	-1.17736	0.261256	PMS1	PMS1 homolog 1, mismatch repair system component
211978_x_at	0.252168	0.00152	3.28034	-1.17868	0.195487	LOC101060363///PPIA	peptidyl-prolyl cis-trans isomerase A pseudogene///peptidylprolyl isomerase A
217772_s_at	0.253357	0.00153	3.27787	-1.18501	0.488348	MTCH2	mitochondrial carrier 2
228986_at	0.253958	0.00155	3.27497	-1.19245	0.925243	OSBPL8	oxysterol binding protein like 8
222484_s_at	0.253958	0.00155	-3.27456	-1.1935	-0.80141	CXCL14	C-X-C motif chemokine ligand 14
201614_s_at	0.253958	0.00155	3.27423	-1.19435	0.494689	RUVBL1	RuvB like AAA ATPase 1
207622_s_at	0.254125	0.00156	3.27143	-1.2015	0.455175	ABCF2	ATP binding cassette subfamily F member 2
228859_at	0.254125	0.00157	3.27134	-1.20174	0.504434	ZGRF1	zinc finger GRF-type containing 1
231094_s_at	0.254125	0.00157	3.27087	-1.20294	0.507497	LOC101928195///LOC100996643///MTHFD1L	methylenetetrahydrofolate dehydrogenase (NADP+ dependent) 1-like pseudogene///monofunctional C1-tetrahydrofolate synthase, mitochondrial-like///methylenetetrahydrofolate dehydrogenase (NADP+ dependent) 1-like
1560148_at	0.254125	0.00157	-3.26985	-1.20556	-0.409808	MIA3	MIA family member 3, ER export factor
235088_at	0.254125	0.00158	3.26926	-1.20706	0.864414	C4orf46	chromosome 4 open reading frame 46
233935_at	0.257292	0.0016	-3.26435	-1.21962	-0.367103	TNFSF14	tumor necrosis factor superfamily member 14
219360_s_at	0.257842	0.00161	3.26273	-1.22377	0.642295	TRPM4	transient receptor potential cation channel subfamily M member 4
201522_x_at	0.258181	0.00161	-3.26136	-1.22725	-0.408905	SNURF///SNRPN	SNRPN upstream reading frame///small nuclear ribonucleoprotein polypeptide N
202756_s_at	0.260569	0.00164	3.25689	-1.23867	0.506131	GPC1	glypican 1
1564521_x_at	0.260569	0.00164	3.25654	-1.23956	0.285871	PRMT5	protein arginine methyltransferase 5
212809_at	0.263943	0.00167	3.25067	-1.25455	0.47196	NFATC2IP	nuclear factor of activated T-cells 2 interacting protein
215747_s_at	0.263943	0.00168	3.24927	-1.25811	0.411224	RCC1	regulator of chromosome condensation 1
225257_at	0.263943	0.00168	-3.24924	-1.25818	-0.385505	CCDC97	coiled-coil domain containing 97
239090_at	0.263943	0.00168	3.24849	-1.26009	0.214067	FAM161A	family with sequence similarity 161 member A
202899_s_at	0.263943	0.00169	3.24614	-1.26607	0.422189	SRSF3	serine and arginine rich splicing factor 3
1563796_s_at	0.263943	0.0017	3.24554	-1.26761	0.530383	EARS2	glutamyl-tRNA synthetase 2, mitochondrial
238960_s_at	0.263943	0.0017	3.24433	-1.27068	0.441326	LARP4	La ribonucleoprotein domain family member 4
238677_at	0.263943	0.0017	3.24412	-1.27122	0.526222	WDR36	WD repeat domain 36
231808_at	0.263943	0.0017	3.24411	-1.27124	0.480894	OIP5-AS1	OIP5 antisense RNA 1
210416_s_at	0.265075	0.00172	3.24182	-1.27706	0.433918	CHEK2	checkpoint kinase 2
219575_s_at	0.265905	0.00174	3.23831	-1.286	0.39222	COG8///PDF	component of oligomeric golgi complex 8///peptide deformylase (mitochondrial)
223018_at	0.265905	0.00174	3.2382	-1.28626	0.334168	NOB1	NIN1/PSMD8 binding protein 1 homolog
204033_at	0.265905	0.00174	3.2379	-1.28703	0.758863	TRIP13	thyroid hormone receptor interactor 13
220246_at	0.265905	0.00174	3.23693	-1.28948	0.586961	CAMK1D	calcium/calmodulin dependent protein kinase ID
201633_s_at	0.265905	0.00175	3.2363	-1.2911	0.551992	CYB5B	cytochrome b5 type B
243711_at	0.268172	0.00177	-3.23267	-1.30032	-0.184191	DDAH1	dimethylarginine dimethylaminohydrolase 1
219927_at	0.269946	0.00179	3.22855	-1.31075	0.970678	FCF1	FCF1 rRNA-processing protein
235947_at	0.269946	0.00179	3.22825	-1.31151	0.319343	LOC101930067	uncharacterized LOC101930067
219588_s_at	0.269946	0.00179	3.2277	-1.31291	0.722615	NCAPG2	non-SMC condensin II complex subunit G2
243643_x_at	0.269946	0.0018	3.22697	-1.31476	0.346439	SLC30A6	solute carrier family 30 member 6
243372_at	0.270065	0.00181	3.22502	-1.31971	0.370184	HSPD1	heat shock protein family D (Hsp60) member 1
209393_s_at	0.270065	0.00182	3.2232	-1.32433	0.349805	EIF4E2	eukaryotic translation initiation factor 4E family member 2
223229_at	0.270065	0.00182	3.22311	-1.32454	0.754251	UBE2T	ubiquitin conjugating enzyme E2 T
201391_at	0.270065	0.00182	3.2228	-1.32533	0.422038	TRAP1	TNF receptor associated protein 1
213823_at	0.270065	0.00184	3.21915	-1.33457	0.450231	HOXA11	homeobox A11
234011_at	0.270065	0.00184	-3.2189	-1.3352	-0.255241
241736_at	0.270065	0.00185	3.21772	-1.33819	0.398186	FBXW2	F-box and WD repeat domain containing 2
216574_s_at	0.270065	0.00185	3.21766	-1.33832	0.487285	RPEL1///RPE	ribulose-5-phosphate-3-epimerase like 1///ribulose-5-phosphate-3-epimerase
205170_at	0.270065	0.00185	3.21762	-1.33843	0.619536	STAT2	signal transducer and activator of transcription 2
214507_s_at	0.270065	0.00186	3.21663	-1.34095	0.442728	EXOSC2	exosome component 2
204977_at	0.270065	0.00186	3.21623	-1.34194	0.350609	DDX10	DEAD-box helicase 10
218590_at	0.270065	0.00186	3.21613	-1.34219	0.350848	C10orf2	chromosome 10 open reading frame 2
213193_x_at	0.270065	0.00187	-3.21423	-1.347	-0.675589	TRBC1	T cell receptor beta constant 1
236625_at	0.270065	0.00187	-3.2134	-1.3491	-0.445998
202928_s_at	0.270065	0.00188	-3.2132	-1.34961	-0.486726	PHF1	PHD finger protein 1
203819_s_at	0.270065	0.00188	3.21259	-1.35116	1.73074	IGF2BP3	insulin like growth factor 2 mRNA binding protein 3
1554780_a_at	0.270065	0.00189	3.21119	-1.35467	0.508261	PHTF2	putative homeodomain transcription factor 2
244115_at	0.270065	0.00189	3.21002	-1.35763	0.698806	FAM126A	family with sequence similarity 126 member A
218349_s_at	0.270065	0.0019	3.2096	-1.35869	0.720594	ZWILCH	zwilch kinetochore protein
235702_at	0.270065	0.0019	-3.20953	-1.35887	-0.406091	ZNF225	zinc finger protein 225
205162_at	0.271204	0.00191	3.20698	-1.36531	0.43194	ERCC8	ERCC excision repair 8, CSA ubiquitin ligase complex subunit
229081_at	0.271204	0.00191	3.20649	-1.36656	0.336397	SLC25A13	solute carrier family 25 member 13
210820_x_at	0.272186	0.00193	3.20448	-1.37163	0.425601	COQ7	coenzyme Q7, hydroxylase
225751_at	0.27599	0.00196	3.1985	-1.38669	0.517676	RBM17	RNA binding motif protein 17
209603_at	0.27599	0.00196	-3.19814	-1.38759	-0.638958	GATA3	GATA binding protein 3
209746_s_at	0.27599	0.00198	3.19561	-1.39395	0.343458	COQ7	coenzyme Q7, hydroxylase
1554576_a_at	0.27599	0.00198	3.19516	-1.39508	0.387634	ETV4	ETS variant 4
1558014_s_at	0.27599	0.00198	3.19509	-1.39526	0.899398	FAR1	fatty acyl-CoA reductase 1
235777_at	0.27599	0.00198	3.19498	-1.39555	0.871799	ANKRD44	ankyrin repeat domain 44
216941_s_at	0.276564	0.00199	3.19323	-1.39995	0.561392	TAF1B	TATA-box binding protein associated factor, RNA polymerase I subunit B
238959_at	0.276564	0.002	3.19265	-1.40139	0.426957	LARP4	La ribonucleoprotein domain family member 4
1555964_at	0.277606	0.00202	3.18926	-1.40992	0.765398	ARL17B///ARL17A	ADP ribosylation factor like GTPase 17B///ADP ribosylation factor like GTPase 17A
203339_at	0.277606	0.00202	3.18887	-1.41089	0.502412	SLC25A12	solute carrier family 25 member 12
201474_s_at	0.277606	0.00203	-3.18824	-1.41249	-0.357183	ITGA3	integrin subunit alpha 3
204806_x_at	0.277606	0.00203	-3.1875	-1.41435	-0.412063	HLA-F	major histocompatibility complex, class I, F
202199_s_at	0.277606	0.00203	3.18677	-1.41617	0.432908	SRPK1	SRSF protein kinase 1
243439_at	0.277606	0.00204	-3.18649	-1.41687	-0.780604	ZNF418	zinc finger protein 418
223079_s_at	0.277606	0.00204	3.18571	-1.41882	0.75452	GLS	glutaminase
217736_s_at	0.278641	0.00206	3.18303	-1.42555	0.41115	EIF2AK1	eukaryotic translation initiation factor 2 alpha kinase 1
237190_at	0.278641	0.00206	-3.18289	-1.42591	-0.222756	BTD	biotinidase
215044_s_at	0.278991	0.00207	3.18167	-1.42896	0.485584	STAM2	signal transducing adaptor molecule 2
216607_s_at	0.279479	0.00208	3.17987	-1.43347	0.866932	LRRD1///CYP51A1	leucine rich repeats and death domain containing 1///cytochrome P450 family 51 subfamily A member 1
226682_at	0.279479	0.00208	-3.1795	-1.43441	-0.951445	RORA	RAR related orphan receptor A
207861_at	0.27948	0.00209	-3.1787	-1.43642	-1.38233	CCL22	C-C motif chemokine ligand 22
216962_at	0.279976	0.00209	3.17732	-1.43986	0.583821	RPAIN	RPA interacting protein
218239_s_at	0.279995	0.0021	3.17576	-1.44378	0.457522	GTPBP4	GTP binding protein 4
211834_s_at	0.279995	0.0021	3.17571	-1.4439	0.395285	TP63	tumor protein p63
226320_at	0.280176	0.00211	3.17471	-1.44642	0.674259	ALYREF	Aly/REF export factor
230489_at	0.280241	0.00212	-3.17384	-1.44859	-0.819078	CD5	CD5 molecule
228043_at	0.280664	0.00213	3.17256	-1.45179	0.429009	UTP15	UTP15, small subunit processome component
1552682_a_at	0.281419	0.00214	3.17089	-1.45596	0.556782	KNL1	kinetochore scaffold 1
234990_at	0.281986	0.00215	3.16942	-1.45964	0.775072	CBX5	chromobox 5
1552792_at	0.281986	0.00215	3.16867	-1.46153	0.523836	SOCS4	suppressor of cytokine signaling 4
224714_at	0.283397	0.00217	3.16521	-1.47016	0.397521	NIFK	nucleolar protein interacting with the FHA domain of MKI67
226658_at	0.283397	0.00217	3.165	-1.47068	0.646356	PDPN	podoplanin
220764_at	0.283397	0.00218	3.16469	-1.47145	0.41068	PPP4R2	protein phosphatase 4 regulatory subunit 2
205296_at	0.283601	0.00218	3.16368	-1.47398	0.59923	RBL1	RB transcriptional corepressor like 1
200753_x_at	0.283624	0.00219	3.16288	-1.47599	0.341666	MIR636///SRSF2	microRNA 636///serine and arginine rich splicing factor 2
222315_at	0.283833	0.0022	-3.16186	-1.47852	-0.823279	LOC100996756	uncharacterized LOC100996756
202397_at	0.284835	0.00221	3.15994	-1.48332	0.76675	NUTF2P4///NUTF2	nuclear transport factor 2 pseudogene 4///nuclear transport factor 2
208777_s_at	0.286107	0.00222	3.15771	-1.48889	0.414563	PSMD11	proteasome 26S subunit, non-ATPase 11
211378_x_at	0.287118	0.00224	3.15578	-1.49368	0.197374	LOC101060363///PPIA	peptidyl-prolyl cis-trans isomerase A pseudogene///peptidylprolyl isomerase A
218032_at	0.289693	0.00227	-3.15112	-1.50531	-0.442364	SNN	stannin
1554019_s_at	0.289693	0.00227	3.15065	-1.50648	0.449687	CEP57L1	centrosomal protein 57 like 1
223724_s_at	0.289693	0.00228	3.14898	-1.51062	0.497633	STAG3L2///STAG3L3///STAG3L1	stromal antigen 3-like 2 (pseudogene)///stromal antigen 3-like 3 (pseudogene)///stromal antigen 3-like 1 (pseudogene)
205611_at	0.289693	0.00229	-3.14809	-1.51285	-0.443173	TNFSF12-TNFSF13///TNFSF12	TNFSF12-TNFSF13 readthrough///tumor necrosis factor superfamily member 12
1552921_a_at	0.289693	0.00229	3.14801	-1.51304	0.722063	FIGNL1	fidgetin like 1
238474_at	0.289693	0.00229	3.14771	-1.51379	0.593655	NUP43	nucleoporin 43
1053_at	0.289693	0.0023	3.14702	-1.5155	0.574589	RFC2	replication factor C subunit 2
239566_at	0.289693	0.00231	3.14598	-1.51809	1.1409
203039_s_at	0.289693	0.00231	3.14524	-1.51992	0.428334	NDUFS1	NADH:ubiquinone oxidoreductase core subunit S1
203775_at	0.289693	0.00233	3.14205	-1.52786	0.660089	SLC25A13	solute carrier family 25 member 13
229479_at	0.289693	0.00233	3.14178	-1.52854	0.43221
207786_at	0.289693	0.00234	3.1414	-1.52946	0.583589	CYP2R1	cytochrome P450 family 2 subfamily R member 1
225828_at	0.289693	0.00234	3.14094	-1.5306	0.393749	DAGLB	diacylglycerol lipase beta
223759_s_at	0.289693	0.00235	3.14019	-1.53247	0.597765	GSG2	germ cell associated 2, haspin
1569934_at	0.289693	0.00235	3.14014	-1.5326	0.175321	PREX2	phosphatidylinositol-3,4,5-trisphosphate dependent Rac exchange factor 2
1553284_s_at	0.289693	0.00235	3.13994	-1.53311	0.291965	LMLN	leishmanolysin like peptidase
232951_at	0.289693	0.00235	-3.13938	-1.53449	-0.533079
211140_s_at	0.289693	0.00235	3.13928	-1.53473	0.694833	CASP2	caspase 2
219705_at	0.289906	0.00236	3.13758	-1.53895	0.294019	QSER1	glutamine and serine rich 1
209112_at	0.289906	0.00236	-3.13756	-1.539	-0.464985	CDKN1B	cyclin dependent kinase inhibitor 1B
208642_s_at	0.290231	0.00237	3.13646	-1.54174	0.362292	XRCC5	X-ray repair cross complementing 5
223163_s_at	0.292293	0.0024	3.13339	-1.54934	0.446789	ZC3HC1	zinc finger C3HC-type containing 1
91816_f_at	0.293443	0.00241	3.13137	-1.55435	0.626203	MEX3D	mex-3 RNA binding family member D
212728_at	0.293647	0.00242	-3.13029	-1.55703	-0.456945	DLG3	discs large MAGUK scaffold protein 3
234992_x_at	0.293647	0.00242	3.12968	-1.55855	0.499437	ECT2	epithelial cell transforming 2
205412_at	0.294529	0.00244	3.12747	-1.56401	0.511974	ACAT1	acetyl-CoA acetyltransferase 1
210073_at	0.294529	0.00246	-3.12461	-1.57109	-0.919215	ST8SIA1	ST8 alpha-N-acetyl-neuraminide alpha-2,8-sialyltransferase 1
205301_s_at	0.294529	0.00246	3.12421	-1.57206	0.647594	OGG1	8-oxoguanine DNA glycosylase
228568_at	0.294529	0.00247	-3.12327	-1.5744	-0.497777	MYZAP	myocardial zonula adherens protein
218982_s_at	0.294529	0.00247	3.12289	-1.57533	0.525501	MRPS17	mitochondrial ribosomal protein S17
202884_s_at	0.294529	0.00247	3.12281	-1.57554	0.593028	PPP2R1B	protein phosphatase 2 scaffold subunit Abeta
200773_x_at	0.294529	0.00248	3.12256	-1.57617	0.190744	PTMA	prothymosin, alpha
231396_s_at	0.294529	0.00248	3.12187	-1.57787	0.73983	FAM126A	family with sequence similarity 126 member A
206545_at	0.294529	0.00248	-3.12164	-1.57843	-0.937251	CD28	CD28 molecule
215307_at	0.294529	0.00249	-3.121	-1.58001	-0.730491	ZNF529	zinc finger protein 529
218257_s_at	0.294529	0.00249	3.12047	-1.58131	0.39583	UGGT1	UDP-glucose glycoprotein glucosyltransferase 1
201308_s_at	0.294529	0.0025	3.11963	-1.58338	1.0272	2021-09-11	septin 11
202188_at	0.294529	0.0025	3.11889	-1.58523	0.379375	NUP93	nucleoporin 93
217972_at	0.294529	0.0025	3.11861	-1.58591	0.552611	CHCHD3	coiled-coil-helix-coiled-coil-helix domain containing 3
204846_at	0.296684	0.00254	-3.11414	-1.59694	-1.1882	CP	ceruloplasmin (ferroxidase)
222267_at	0.296684	0.00254	3.11408	-1.5971	0.36225	TMEM209	transmembrane protein 209
207346_at	0.296684	0.00254	3.11372	-1.59799	0.24007	STX2	syntaxin 2
218123_at	0.296684	0.00254	3.11338	-1.59883	0.40091	C21orf59	chromosome 21 open reading frame 59
209095_at	0.29701	0.00255	3.11217	-1.60182	0.465527	DLD	dihydrolipoamide dehydrogenase
202874_s_at	0.29701	0.00256	3.11161	-1.6032	0.584606	ATP6V1C1	ATPase H+ transporting V1 subunit C1
223562_at	0.297229	0.00257	-3.11065	-1.60556	-0.446629	PARVG	parvin gamma
235026_at	0.297229	0.00257	3.10996	-1.60725	0.714053	C12orf66	chromosome 12 open reading frame 66
204244_s_at	0.297494	0.00259	3.10776	-1.61268	0.635695	DBF4	DBF4 zinc finger
217140_s_at	0.297494	0.00259	3.10762	-1.61303	0.543936	VDAC1	voltage dependent anion channel 1
205763_s_at	0.297494	0.00259	3.10758	-1.61313	0.390629	DDX18	DEAD-box helicase 18
216031_x_at	0.29796	0.00261	3.10556	-1.61809	0.28201	HN1L	hematological and neurological expressed 1 like
234300_s_at	0.29796	0.00261	-3.10508	-1.61928	-0.679206	ZFP28	ZFP28 zinc finger protein
223570_at	0.29796	0.00261	3.10498	-1.61952	0.58502	MCM10	minichromosome maintenance 10 replication initiation factor
211949_s_at	0.29907	0.00263	3.10306	-1.62425	0.552042	NOLC1	nucleolar and coiled-body phosphoprotein 1
1554216_at	0.300786	0.00266	3.09898	-1.63427	0.299915	VPS50	VPS50, EARP/GARPII complex subunit
216969_s_at	0.300786	0.00266	3.09872	-1.63493	0.429667	KIF22	kinesin family member 22
220295_x_at	0.300786	0.00267	3.09773	-1.63736	0.972445	DEPDC1	DEP domain containing 1
230378_at	0.300786	0.00267	-3.09736	-1.63826	-0.729898	SCGB3A1	secretoglobin family 3A member 1
201327_s_at	0.300786	0.00267	3.09715	-1.63879	0.361237	CCT6A	chaperonin containing TCP1 subunit 6A
201476_s_at	0.300786	0.00267	3.09705	-1.63903	0.799431	RRM1	ribonucleotide reductase catalytic subunit M1
1552554_a_at	0.303542	0.00271	3.09203	-1.65135	0.519809	NLRC4	NLR family CARD domain containing 4
228578_at	0.303542	0.00272	3.09183	-1.65184	0.332571	RBM45	RNA binding motif protein 45
219176_at	0.303542	0.00274	3.08832	-1.66044	0.372918	C2orf47	chromosome 2 open reading frame 47
224601_at	0.303542	0.00275	3.08769	-1.66198	0.457459	SNHG16///SNORD1C///SNORD1A	small nucleolar RNA host gene 16///small nucleolar RNA, C/D box 1C///small nucleolar RNA, C/D box 1A
210188_at	0.303542	0.00275	3.08766	-1.66206	0.653728	GABPA	GA binding protein transcription factor alpha subunit
228810_at	0.303542	0.00275	3.08766	-1.66207	0.706544	CCNYL1	cyclin Y like 1
210076_x_at	0.303542	0.00275	3.08735	-1.66283	0.325608	SERBP1	SERPINE1 mRNA binding protein 1
214845_s_at	0.303542	0.00276	3.08598	-1.66618	0.754424	CALU	calumenin
210879_s_at	0.303542	0.00276	-3.08593	-1.66631	-0.398925	RAB11FIP5	RAB11 family interacting protein 5
236664_at	0.303542	0.00277	-3.08568	-1.66693	-0.267412	AKT2	AKT serine/threonine kinase 2
204576_s_at	0.303542	0.00277	3.0855	-1.66737	0.311202	CLUAP1	clusterin associated protein 1
239237_at	0.303542	0.00277	-3.08543	-1.66753	-0.751157	TRG-AS1	T cell receptor gamma locus antisense RNA 1
220036_s_at	0.303542	0.00277	-3.08526	-1.66795	-0.302798	LMBR1L	limb development membrane protein 1 like
214459_x_at	0.304768	0.00279	-3.08325	-1.67286	-0.262572	HLA-C	major histocompatibility complex, class I, C
209956_s_at	0.304876	0.00279	3.08235	-1.67507	0.661038	CAMK2B	calcium/calmodulin dependent protein kinase II beta
206961_s_at	0.304876	0.00281	3.08064	-1.67926	0.497244	MED20	mediator complex subunit 20
235321_at	0.304876	0.00282	3.0794	-1.68228	0.218829	NDUFS1	NADH:ubiquinone oxidoreductase core subunit S1
216235_s_at	0.304876	0.00283	3.07874	-1.6839	0.428507	EDNRA	endothelin receptor type A
216996_s_at	0.304876	0.00283	3.07869	-1.68403	0.449554	FASTKD2	FAST kinase domains 2
212825_at	0.304876	0.00283	3.07772	-1.68641	0.60018	PAXIP1	PAX interacting protein 1
215286_s_at	0.304876	0.00284	3.07734	-1.68733	0.609645	PHTF2	putative homeodomain transcription factor 2
211048_s_at	0.304876	0.00284	3.07675	-1.68878	0.586058	PDIA4	protein disulfide isomerase family A member 4
212282_at	0.304876	0.00286	3.07498	-1.6931	0.645648	TMEM97	transmembrane protein 97
200776_s_at	0.304876	0.00286	3.07474	-1.69368	0.620852	BZW1	basic leucine zipper and W2 domains 1
231102_at	0.304876	0.00287	3.07379	-1.69602	0.420243	CROT	carnitine O-octanoyltransferase
208194_s_at	0.304876	0.00287	3.07373	-1.69615	0.461088	STAM2	signal transducing adaptor molecule 2
1555761_x_at	0.304876	0.00287	3.07303	-1.69786	0.270912	RBM15	RNA binding motif protein 15
200884_at	0.304876	0.00288	3.07222	-1.69983	0.496561	CKB	creatine kinase B
214727_at	0.304876	0.00289	3.07111	-1.70255	0.713511	BRCA2	BRCA2, DNA repair associated
239288_at	0.304876	0.00291	-3.06914	-1.70735	-0.656469	TNIK	TRAF2 and NCK interacting kinase
238472_at	0.304876	0.00291	-3.06839	-1.7092	-0.484866	FBXO9	F-box protein 9
234937_x_at	0.304876	0.00292	-3.06769	-1.71089	-0.723507	ZFP28	ZFP28 zinc finger protein
226771_at	0.304876	0.00292	-3.06751	-1.71134	-0.664311	ATP8B2	ATPase phospholipid transporting 8B2
203899_s_at	0.304876	0.00293	3.0668	-1.71306	0.307115	CRCP	CGRP receptor component
234240_at	0.304876	0.00293	3.06627	-1.71435	0.217087	GSN	gelsolin
236076_at	0.304876	0.00294	3.06551	-1.71622	0.51808	LOC257396	uncharacterized LOC257396
222231_s_at	0.304876	0.00295	3.06481	-1.71791	0.454022	LRRC59	leucine rich repeat containing 59
214177_s_at	0.304876	0.00295	-3.06477	-1.71802	-0.412233	PBXIP1	PBX homeobox interacting protein 1
206621_s_at	0.304876	0.00295	3.06446	-1.71878	0.294451	EIF4H	eukaryotic translation initiation factor 4H
235260_s_at	0.304876	0.00296	3.06332	-1.72155	0.499477	PACRGL	PARK2 coregulated like
231939_s_at	0.304876	0.00296	3.06331	-1.72157	0.427368	BDP1	B double prime 1, subunit of RNA polymerase III transcription initiation factor IIIB
243695_at	0.304876	0.00296	-3.06288	-1.72262	-0.420586
210370_s_at	0.304876	0.00296	-3.06269	-1.72307	-0.855676	LY9	lymphocyte antigen 9
225253_s_at	0.304876	0.00297	3.06262	-1.72326	0.599321	METTL2A///METTL2B	methyltransferase like 2A///methyltransferase like 2B
215773_x_at	0.304876	0.00298	3.0614	-1.72623	0.329504	PARP2	poly(ADP-ribose) polymerase 2
206046_at	0.304876	0.00298	3.06115	-1.72684	0.331631	ADAM23	ADAM metallopeptidase domain 23
221685_s_at	0.304876	0.00299	3.06012	-1.72935	0.522651	SPDL1	spindle apparatus coiled-coil protein 1
234944_s_at	0.304876	0.00299	3.06002	-1.7296	0.544381	MTFR2	mitochondrial fission regulator 2
230109_at	0.304876	0.00299	-3.05997	-1.72971	-0.646609	PDE7B	phosphodiesterase 7B
208672_s_at	0.304876	0.00299	3.05936	-1.73119	0.290777	SRSF3	serine and arginine rich splicing factor 3
1555487_a_at	0.304876	0.00299	3.05934	-1.73123	0.372915	ACTR3B	ARP3 actin related protein 3 homolog B
205401_at	0.306453	0.00302	3.05662	-1.73786	0.719858	AGPS	alkylglycerone phosphate synthase
1555384_a_at	0.306453	0.00304	3.05454	-1.74292	0.435903	LARP4	La ribonucleoprotein domain family member 4
202019_s_at	0.306453	0.00304	3.05403	-1.74414	0.545315	LANCL1	LanC like 1
216384_x_at	0.306453	0.00304	3.05391	-1.74444	0.307161	LOC100506248///MIR1244-2///MIR1244-3///MIR1244-1///LOC728026///PTMA	prothymosin alpha///microRNA 1244-2///microRNA 1244-3///microRNA 1244-1///prothymosin alpha-like///prothymosin, alpha
211081_s_at	0.306453	0.00305	3.05283	-1.74706	0.577818	MAP4K5	mitogen-activated protein kinase kinase kinase kinase 5
234863_x_at	0.306453	0.00305	3.0528	-1.74714	0.589047	FBXO5	F-box protein 5
224775_at	0.306453	0.00306	3.05201	-1.74907	0.398042	IWS1	IWS1, SUPT6H interacting protein
1553107_s_at	0.306453	0.00307	3.05148	-1.75036	0.327865	C5orf24	chromosome 5 open reading frame 24
204827_s_at	0.306453	0.00307	3.05107	-1.75135	0.501649	CCNF	cyclin F
224926_at	0.306453	0.00308	3.04985	-1.7543	0.261755	EXOC4	exocyst complex component 4
200812_at	0.306453	0.00308	3.04966	-1.75476	0.311127	CCT7	chaperonin containing TCP1 subunit 7
201397_at	0.306453	0.00309	3.04921	-1.75587	0.752064	PHGDH	phosphoglycerate dehydrogenase
225993_at	0.306453	0.00309	3.04865	-1.75722	0.437177	EARS2	glutamyl-tRNA synthetase 2, mitochondrial
224204_x_at	0.306453	0.00309	3.04855	-1.75747	0.537189	ARNTL2	aryl hydrocarbon receptor nuclear translocator like 2
223128_at	0.306453	0.00309	3.0484	-1.75783	0.379493	FOXRED1	FAD dependent oxidoreductase domain containing 1
219541_at	0.306492	0.0031	-3.04775	-1.7594	-0.494813	LIME1	Lck interacting transmembrane adaptor 1
225943_at	0.306542	0.00311	3.04694	-1.76138	0.639458	NLN	neurolysin
222192_s_at	0.306542	0.00311	3.04649	-1.76247	0.431355	LDAH	lipid droplet associated hydrolase
230696_at	0.306977	0.00313	3.04477	-1.76662	0.56461	ATP2A1-AS1	ATP2A1 antisense RNA 1
209604_s_at	0.306977	0.00313	-3.04439	-1.76757	-0.78613	GATA3	GATA binding protein 3
204315_s_at	0.306977	0.00313	3.04421	-1.768	0.619451	GTSE1	G2 and S-phase expressed 1
216880_at	0.307354	0.00314	3.04319	-1.77046	0.461067	RAD51B	RAD51 paralog B
1554794_a_at	0.307501	0.00315	3.04189	-1.77363	0.786375	UBE3C	ubiquitin protein ligase E3C
207590_s_at	0.307501	0.00316	3.04146	-1.77465	0.671143	CENPI	centromere protein I
222606_at	0.307501	0.00317	3.04047	-1.77706	0.524761	ZWILCH	zwilch kinetochore protein
201946_s_at	0.307501	0.00317	3.04002	-1.77814	0.638241	CCT2	chaperonin containing TCP1 subunit 2
243093_at	0.307501	0.00318	3.03939	-1.77968	0.658511	C2orf49	chromosome 2 open reading frame 49
201676_x_at	0.307501	0.00318	3.03931	-1.77987	0.320301	PSMA1	proteasome subunit alpha 1
219583_s_at	0.307501	0.00319	3.03773	-1.78369	0.650281	SPATA7	spermatogenesis associated 7
209483_s_at	0.307501	0.0032	3.03738	-1.78454	0.385618	NSL1	NSL1, MIS12 kinetochore complex component
1553691_at	0.307501	0.0032	3.03705	-1.78533	0.603155	B3GALNT2	beta-1,3-N-acetylgalactosaminyltransferase 2
220238_s_at	0.307501	0.0032	3.0368	-1.78594	0.879905	KLHL7	kelch like family member 7
241682_at	0.307501	0.00321	3.0365	-1.78668	0.578035	KLHL23	kelch like family member 23
235294_at	0.309007	0.00323	3.0341	-1.79249	0.502102	SIKE1	suppressor of IKBKE 1
225520_at	0.309007	0.00323	3.03368	-1.79349	0.71899	LOC101928195///LOC100996643///MTHFD1L	methylenetetrahydrofolate dehydrogenase (NADP+ dependent) 1-like pseudogene///monofunctional C1-tetrahydrofolate synthase, mitochondrial-like///methylenetetrahydrofolate dehydrogenase (NADP+ dependent) 1-like
205129_at	0.310175	0.00325	3.03146	-1.79885	0.635405	NPM3	nucleophosmin/nucleoplasmin 3
231955_s_at	0.310175	0.00326	3.03095	-1.80009	0.834111	HIBADH	3-hydroxyisobutyrate dehydrogenase
227444_at	0.310175	0.00326	-3.03065	-1.80081	-1.09336	ARMCX4	armadillo repeat containing, X-linked 4
232906_at	0.310801	0.00328	-3.02916	-1.80441	-0.355614
244439_at	0.310801	0.00328	3.02857	-1.80584	0.960577	SPRED1	sprouty related EVH1 domain containing 1
218890_x_at	0.310801	0.00329	3.02816	-1.80682	0.502499	MRPL35	mitochondrial ribosomal protein L35
217809_at	0.310801	0.0033	3.0271	-1.80938	0.422711	BZW2	basic leucine zipper and W2 domains 2
206587_at	0.310801	0.00331	3.0262	-1.81156	0.546217	CCT6B	chaperonin containing TCP1 subunit 6B
1565614_at	0.310801	0.00331	3.02612	-1.81175	0.24377
213417_at	0.310801	0.00331	3.0259	-1.81227	0.298667	TBX2	T-box 2
219978_s_at	0.311047	0.00332	3.02506	-1.81431	1.00245	NUSAP1	nucleolar and spindle associated protein 1
214501_s_at	0.311257	0.00332	3.02426	-1.81625	0.39324	H2AFY	H2A histone family member Y
210402_at	0.312409	0.00336	3.02106	-1.82397	0.734541	KCNJ1	potassium voltage-gated channel subfamily J member 1
217456_x_at	0.312409	0.00336	-3.02076	-1.82468	-0.263458	HLA-E	major histocompatibility complex, class I, E
233411_at	0.312409	0.00337	-3.02006	-1.82636	-0.43647
205761_s_at	0.312409	0.00337	3.01945	-1.82784	0.714217	DUS4L	dihydrouridine synthase 4 like
34187_at	0.312409	0.00338	3.01874	-1.82955	0.237152	RBMS2	RNA binding motif single stranded interacting protein 2
224427_s_at	0.312409	0.00339	3.01758	-1.83234	0.494797	PAPOLG	poly(A) polymerase gamma
215380_s_at	0.312409	0.00339	3.01753	-1.83246	0.469509	GGCT	gamma-glutamylcyclotransferase
201387_s_at	0.312409	0.0034	3.01718	-1.8333	1.7526	UCHL1	ubiquitin C-terminal hydrolase L1
225696_at	0.312409	0.0034	3.01713	-1.83343	0.300306	COPS7B	COP9 signalosome subunit 7B
218347_at	0.312409	0.0034	3.0164	-1.83519	0.354835	TYW1	tRNA-yW synthesizing protein 1 homolog
211256_x_at	0.312409	0.0034	-3.01638	-1.83524	-0.342511	BTN2A1	butyrophilin subfamily 2 member A1
203712_at	0.312409	0.00342	3.01481	-1.83901	0.318337	PUM3	pumilio RNA binding family member 3
219454_at	0.312409	0.00343	3.01407	-1.8408	1.36566	EGFL6	EGF like domain multiple 6
213081_at	0.312409	0.00343	-3.01397	-1.84104	-0.366869	ZBTB22	zinc finger and BTB domain containing 22
212075_s_at	0.312409	0.00343	3.01396	-1.84105	0.508169	CSNK2A1	casein kinase 2 alpha 1
211080_s_at	0.312409	0.00343	3.01355	-1.84203	0.94249	NEK2	NIMA related kinase 2
239764_at	0.312409	0.00344	3.01319	-1.8429	0.31338	ITPR1-AS1	ITPR1 antisense RNA 1 (head to head)
232682_at	0.312409	0.00344	3.01274	-1.84398	0.786439	MREG	melanoregulin
1565818_s_at	0.312409	0.00345	3.01222	-1.84525	0.666971	IKZF1	IKAROS family zinc finger 1
232398_at	0.312781	0.00346	3.01115	-1.84782	0.560276	CCDC150	coiled-coil domain containing 150
1558959_at	0.312781	0.00346	3.01067	-1.84896	0.652383	FAM126B	family with sequence similarity 126 member B
203105_s_at	0.312781	0.00347	3.00959	-1.85156	0.632849	DNM1L	dynamin 1 like
1553801_a_at	0.312781	0.00348	3.00928	-1.85232	0.583419	DTD2	D-tyrosyl-tRNA deacylase 2 (putative)
233430_at	0.312781	0.00349	-3.00837	-1.8545	-0.37489	TBC1D22B	TBC1 domain family member 22B
231260_at	0.312781	0.00349	-3.00789	-1.85564	-0.540416	ZNF582-AS1	ZNF582 antisense RNA 1 (head to head)
206445_s_at	0.312781	0.00349	3.00763	-1.85628	0.314299	PRMT1	protein arginine methyltransferase 1
205393_s_at	0.312781	0.0035	3.00685	-1.85815	0.94414	CHEK1	checkpoint kinase 1
211796_s_at	0.312781	0.0035	-3.00675	-1.85838	-0.602209	TRBC1	T cell receptor beta constant 1
209626_s_at	0.312781	0.00351	3.00626	-1.85956	0.652398	OSBPL3	oxysterol binding protein like 3
218507_at	0.313031	0.00352	3.00544	-1.86153	0.538488	HILPDA	hypoxia inducible lipid droplet associated
223305_at	0.313375	0.00352	-3.00452	-1.86374	-0.358676	TMEM216	transmembrane protein 216
203576_at	0.313448	0.00353	3.00389	-1.86525	0.38974	BCAT2	branched chain amino acid transaminase 2
205085_at	0.313622	0.00354	3.00315	-1.86702	0.699435	ORC1	origin recognition complex subunit 1
243644_at	0.31439	0.00355	3.00178	-1.87032	0.193486
203488_at	0.314449	0.00357	-2.99997	-1.87466	-0.28407	ADGRL1	adhesion G protein-coupled receptor L1
230856_at	0.314449	0.00357	-2.99991	-1.8748	-0.395233	ARSG	arylsulfatase G
211205_x_at	0.314449	0.00358	2.99968	-1.87535	0.877896	PIP5K1A	phosphatidylinositol-4-phosphate 5-kinase type 1 alpha
210290_at	0.314449	0.00358	2.99953	-1.8757	0.608892	ZNF174	zinc finger protein 174
202886_s_at	0.316564	0.00361	2.99663	-1.88265	0.717422	PPP2R1B	protein phosphatase 2 scaffold subunit Abeta
1565833_at	0.316564	0.00362	2.99567	-1.88495	0.323268
1552708_a_at	0.316564	0.00362	2.99563	-1.88504	0.307498	DUSP19	dual specificity phosphatase 19
1555292_at	0.316564	0.00362	2.99509	-1.88634	0.436995	STRIP2	striatin interacting protein 2
222571_at	0.317497	0.00364	-2.99355	-1.89002	-0.315543	ST6GALNAC6	ST6 N-acetylgalactosaminide alpha-2,6-sialyltransferase 6
220991_s_at	0.317812	0.00365	2.99268	-1.89212	0.52149	RNF32	ring finger protein 32
224489_at	0.3206	0.0037	-2.98786	-1.90365	-0.706302	LOC101929774	uncharacterized LOC101929774
215176_x_at	0.3206	0.0037	-2.98781	-1.90375	-1.58402	IGK///IGKC	immunoglobulin kappa locus///immunoglobulin kappa constant
220171_x_at	0.3206	0.00371	2.98731	-1.90496	0.486866	GPALPP1	GPALPP motifs containing 1
1555595_at	0.3206	0.00372	2.98631	-1.90734	0.484297	SCRN3	secernin 3
218119_at	0.3206	0.00372	2.986	-1.90809	0.392865	TIMM23B///TIMM23	translocase of inner mitochondrial membrane 23 homolog B///translocase of inner mitochondrial membrane 23
214876_s_at	0.3206	0.00372	2.98588	-1.90837	0.575221	TUBGCP5	tubulin gamma complex associated protein 5
208679_s_at	0.3206	0.00373	2.98565	-1.90891	0.249733	ARPC2	actin related protein 2/3 complex subunit 2
227349_at	0.3206	0.00373	2.98542	-1.90947	0.580701	HELLS	helicase, lymphoid-specific
216280_s_at	0.321419	0.00375	2.98362	-1.91376	0.289679	DICER1	dicer 1, ribonuclease III
211078_s_at	0.321419	0.00375	2.98349	-1.91408	0.246503	STK3	serine/threonine kinase 3
216189_at	0.321641	0.00376	-2.98272	-1.91591	-0.231301
222775_s_at	0.322165	0.00377	2.98164	-1.9185	0.354931	MRPL35	mitochondrial ribosomal protein L35
218470_at	0.322294	0.00378	2.98063	-1.92089	0.476056	YARS2	tyrosyl-tRNA synthetase 2
206109_at	0.322294	0.0038	-2.97918	-1.92435	-0.341476	FUT1	fucosyltransferase 1 (H blood group)
205878_at	0.322294	0.0038	-2.97906	-1.92464	-0.456916	POU6F1	POU class 6 homeobox 1
225484_at	0.322294	0.00381	2.97817	-1.92677	0.625032	CEP41	centrosomal protein 41
1553863_at	0.322294	0.00382	2.97755	-1.92824	0.345823	WDFY4	WDFY family member 4
210062_s_at	0.322294	0.00382	2.97733	-1.92876	0.633588	ZNF589	zinc finger protein 589
205120_s_at	0.322294	0.00382	2.97696	-1.92965	0.423166	SGCB	sarcoglycan beta
1555543_a_at	0.322294	0.00383	2.97632	-1.93117	0.449548	CLCC1	chloride channel CLIC like 1
232354_at	0.322294	0.00383	-2.97608	-1.93174	-0.269923
218238_at	0.322294	0.00384	2.97541	-1.93334	0.418978	GTPBP4	GTP binding protein 4
205394_at	0.322294	0.00384	2.97505	-1.93419	0.950346	CHEK1	checkpoint kinase 1
218497_s_at	0.322294	0.00385	2.97477	-1.93485	0.31778	RNASEH1	ribonuclease H1
213136_at	0.322294	0.00385	-2.97466	-1.93512	-0.364121	PTPN2	protein tyrosine phosphatase, non-receptor type 2
224971_at	0.322439	0.00386	2.97399	-1.93673	0.351127	MRPL30	mitochondrial ribosomal protein L30
200692_s_at	0.322443	0.00387	2.97296	-1.93918	0.565165	HSPA9	heat shock protein family A (Hsp70) member 9
201705_at	0.322443	0.00387	2.97295	-1.93921	0.298206	PSMD7	proteasome 26S subunit, non-ATPase 7
200955_at	0.322558	0.00389	2.97145	-1.94276	0.296075	IMMT	inner membrane mitochondrial protein
219027_s_at	0.322558	0.00389	2.97095	-1.94396	0.506474	MYO9A	myosin IXA
229636_at	0.322558	0.0039	-2.97024	-1.94565	-0.498904	CYB561D2	cytochrome b561 family member D2
202613_at	0.322558	0.0039	2.97005	-1.9461	0.515662	CTPS1	CTP synthase 1
215481_s_at	0.322558	0.00391	2.96939	-1.94767	0.618104	PEX5	peroxisomal biogenesis factor 5
213098_at	0.322558	0.00391	2.96931	-1.94785	0.289448	CNOT9	CCR4-NOT transcription complex subunit 9
1568795_at	0.322558	0.00391	2.96921	-1.9481	0.513723	LOC105373495	uncharacterized LOC105373495
206860_s_at	0.322807	0.00393	2.96801	-1.95096	0.373735	MIOS	meiosis regulator for oocyte development
1555307_at	0.322807	0.00393	2.96792	-1.95117	0.20614	TTF2	transcription termination factor 2
200769_s_at	0.322994	0.00393	2.96721	-1.95285	0.875519	MAT2A	methionine adenosyltransferase 2A
1555417_a_at	0.323011	0.00394	2.96668	-1.95411	0.401599	TAS1R1	taste 1 receptor member 1
204887_s_at	0.323471	0.00396	2.9653	-1.95739	0.666263	PLK4	polo like kinase 4
212478_at	0.323471	0.00396	2.96513	-1.9578	0.400618	RMND5A	required for meiotic nuclear division 5 homolog A
241781_at	0.323471	0.00396	2.96466	-1.9589	0.551236	CARNMT1	carnosine N-methyltransferase 1
222684_s_at	0.32369	0.00398	2.9635	-1.96167	0.299226	NOL10	nucleolar protein 10
203805_s_at	0.32369	0.00398	2.96342	-1.96186	0.512585	FANCA	Fanconi anemia complementation group A
219296_at	0.324972	0.004	2.9614	-1.96665	0.697251	ZDHHC13	zinc finger DHHC-type containing 13
1554424_at	0.324972	0.00401	2.96105	-1.96747	0.70209	FIP1L1	factor interacting with PAPOLA and CPSF1
224632_at	0.325638	0.00403	2.95938	-1.97145	0.604187	GPATCH4	G-patch domain containing 4
1561762_s_at	0.325638	0.00403	2.95934	-1.97153	0.485245
210227_at	0.325699	0.00403	-2.95877	-1.97288	-0.29437	DLGAP2	DLG associated protein 2
222922_at	0.330789	0.0041	2.95297	-1.98663	0.489553	KCNE3	potassium voltage-gated channel subfamily E regulatory subunit 3
210915_x_at	0.331113	0.00411	-2.95213	-1.98862	-0.581671	TRBC1	T cell receptor beta constant 1
219247_s_at	0.332795	0.00414	-2.9499	-1.99391	-0.564616	ZDHHC14	zinc finger DHHC-type containing 14
235109_at	0.333458	0.00415	2.94858	-1.99702	0.532028	ZBED3	zinc finger BED-type containing 3
212378_at	0.333458	0.00416	2.94799	-1.99843	0.497462	GART	phosphoribosylglycinamide formyltransferase, phosphoribosylglycinamide synthetase, phosphoribosylaminoimidazole synthetase
226209_at	0.333458	0.00417	2.94771	-1.99908	0.485193	NDUFV3	NADH:ubiquinone oxidoreductase subunit V3
204718_at	0.334541	0.00419	-2.9461	-2.00289	-0.567348	EPHB6	EPH receptor B6
200905_x_at	0.335397	0.0042	-2.94472	-2.00614	-0.311618	HLA-E	major histocompatibility complex, class I, E
239802_at	0.335661	0.00421	-2.94395	-2.00796	-0.319915	SAP30L	SAP30 like
213913_s_at	0.337489	0.00425	2.9408	-2.0154	0.426844	TBC1D30	TBC1 domain family member 30
207614_s_at	0.337489	0.00426	2.94036	-2.01643	0.286004	CUL1	cullin 1
228729_at	0.337489	0.00428	2.93862	-2.02055	0.920114	CCNB1	cyclin B1
239649_at	0.337489	0.00428	2.93829	-2.02131	0.413872
226784_at	0.337489	0.00429	2.93796	-2.02211	0.557071	TWISTNB	TWIST neighbor
244190_at	0.337489	0.0043	2.93669	-2.02509	1.10091	THAP5	THAP domain containing 5
205371_s_at	0.337489	0.00431	2.93634	-2.02593	0.694698	DBT	dihydrolipoamide branched chain transacylase E2
225575_at	0.337489	0.00431	-2.936	-2.02673	-1.15052	LIFR	leukemia inhibitory factor receptor alpha
231877_at	0.337489	0.00431	2.93572	-2.02738	0.349464	TRMT10A	tRNA methyltransferase 10A
224721_at	0.337489	0.00432	2.93492	-2.02928	0.364143	WDR75	WD repeat domain 75
33148_at	0.337489	0.00433	2.93471	-2.02977	0.589981	ZFR	zinc finger RNA binding protein
218884_s_at	0.337489	0.00433	2.93436	-2.03058	0.660671	GUF1	GUF1 homolog, GTPase
217553_at	0.337489	0.00433	2.93428	-2.03079	0.899641	STEAP1B	STEAP family member 1B
204320_at	0.337489	0.00434	2.93352	-2.03256	0.904073	COL11A1	collagen type XI alpha 1 chain
1569958_at	0.337489	0.00434	2.93352	-2.03257	0.213771	DEPDC1-AS1	DEPDC1 antisense RNA 1
218591_s_at	0.337489	0.00435	2.93322	-2.03327	0.250434	NOL10	nucleolar protein 10
227966_s_at	0.337489	0.00435	2.93283	-2.03418	0.343896	CCDC74B///CCDC74A	coiled-coil domain containing 74B///coiled-coil domain containing 74A
236282_at	0.337489	0.00435	2.93276	-2.03435	0.403576	LOC101927420	uncharacterized LOC101927420
218365_s_at	0.337489	0.00436	2.93226	-2.03554	0.413759	DARS2	aspartyl-tRNA synthetase 2, mitochondrial
219262_at	0.337489	0.00436	2.93223	-2.03561	0.362308	SUV39H2	suppressor of variegation 3-9 homolog 2
219960_s_at	0.337549	0.00436	2.93168	-2.0369	0.450147	UCHL5	ubiquitin C-terminal hydrolase L5
200828_s_at	0.33883	0.00439	2.92989	-2.04111	0.299278	ZNF207	zinc finger protein 207
244368_x_at	0.33953	0.0044	-2.9287	-2.04392	-0.265865	SUGT1	SGT1 homolog, MIS12 kinetochore complex assembly cochaperone
210334_x_at	0.339731	0.00442	2.92751	-2.04671	0.798195	BIRC5	baculoviral IAP repeat containing 5
203830_at	0.339731	0.00442	2.92718	-2.04749	0.70087	C17orf75	chromosome 17 open reading frame 75
1565329_at	0.339731	0.00444	2.92614	-2.04993	0.383529	POLE4	DNA polymerase epsilon 4, accessory subunit
204752_x_at	0.339731	0.00444	2.926	-2.05027	0.314585	PARP2	poly(ADP-ribose) polymerase 2
242031_at	0.339731	0.00444	-2.92563	-2.05112	-0.583309
218003_s_at	0.339731	0.00444	2.9256	-2.05121	0.363941	FKBP3	FK506 binding protein 3
213909_at	0.339778	0.00445	2.92486	-2.05293	1.36363	LRRC15	leucine rich repeat containing 15
223804_s_at	0.339778	0.00446	2.92459	-2.05358	0.357458	THUMPD3	THUMP domain containing 3
219703_at	0.33978	0.00446	2.92411	-2.05471	0.581243	MNS1	meiosis specific nuclear structural 1
217445_s_at	0.339786	0.00447	2.92362	-2.05585	0.825469	GART	phosphoribosylglycinamide formyltransferase, phosphoribosylglycinamide synthetase, phosphoribosylaminoimidazole synthetase
223098_s_at	0.341213	0.0045	2.92134	-2.06121	0.469288	LOC100507577///LONP2	uncharacterized LOC100507577///lon peptidase 2, peroxisomal
201035_s_at	0.341213	0.0045	2.92122	-2.06149	0.43469	HADH	hydroxyacyl-CoA dehydrogenase
219494_at	0.341813	0.00452	2.9196	-2.0653	0.620668	RAD54B	RAD54 homolog B (S. cerevisiae)
1564467_at	0.341813	0.00452	2.91936	-2.06585	0.480232	FAM161A	family with sequence similarity 161 member A
218898_at	0.341813	0.00453	2.91912	-2.06642	0.653145	FAM57A	family with sequence similarity 57 member A
211746_x_at	0.341813	0.00453	2.91871	-2.06738	0.302411	PSMA1	proteasome subunit alpha 1
211220_s_at	0.345673	0.00459	2.91437	-2.07757	0.720674	HSF2	heat shock transcription factor 2
218564_at	0.347715	0.00463	2.91123	-2.08491	0.574148	RFWD3	ring finger and WD repeat domain 3
202747_s_at	0.347715	0.00463	-2.91101	-2.08544	-0.717255	ITM2A	integral membrane protein 2A
218488_at	0.347715	0.00464	2.91091	-2.08567	0.293139	EIF2B3	eukaryotic translation initiation factor 2B subunit gamma
210320_s_at	0.352348	0.00471	2.90579	-2.09765	0.49907	DDX52	DEAD-box helicase 52
1558116_x_at	0.352348	0.00471	2.90539	-2.09857	0.387804	RECK	reversion inducing cysteine rich protein with kazal motifs
229876_at	0.352556	0.00472	2.90437	-2.10095	0.373824	PHKA1	phosphorylase kinase regulatory subunit alpha 1
217799_x_at	0.352556	0.00473	2.90389	-2.10208	0.525869	UBE2H	ubiquitin conjugating enzyme E2 H
211395_x_at	0.352556	0.00474	2.90327	-2.10355	1.50478	FCGR2C	Fc fragment of IgG receptor IIc (gene/pseudogene)
220892_s_at	0.352556	0.00475	2.90272	-2.10482	0.670446	PSAT1	phosphoserine aminotransferase 1
1552912_a_at	0.352556	0.00475	2.90227	-2.10588	0.47561	IL23R	interleukin 23 receptor
204393_s_at	0.352556	0.00475	2.90225	-2.10591	0.501388	ACPP	acid phosphatase, prostate
1552988_at	0.352556	0.00476	2.90189	-2.10675	0.298279	C11orf65	chromosome 11 open reading frame 65
1554572_a_at	0.35268	0.00477	2.9013	-2.10813	0.645597	SUV39H2	suppressor of variegation 3-9 homolog 2
235287_at	0.352744	0.00478	2.90035	-2.11036	0.714413	CDK6	cyclin dependent kinase 6
227263_at	0.352744	0.00478	-2.90027	-2.11053	-0.297188	C8orf58	chromosome 8 open reading frame 58
204463_s_at	0.352744	0.00479	2.89984	-2.11155	0.785445	EDNRA	endothelin receptor type A
200730_s_at	0.352772	0.00479	2.89934	-2.1127	1.05814	PTP4A1	protein tyrosine phosphatase type IVA, member 1
204798_at	0.354667	0.00483	-2.89702	-2.11812	-0.731554	MYB	MYB proto-oncogene, transcription factor
1553956_at	0.354797	0.00484	2.89633	-2.11973	0.590538	TMEM237	transmembrane protein 237
242722_at	0.354797	0.00484	2.89597	-2.12058	0.539239	LMO7	LIM domain 7
232596_at	0.355719	0.00486	2.8946	-2.12376	0.54982	DIAPH3	diaphanous related formin 3
214690_at	0.356904	0.00491	2.89139	-2.13124	0.447111	TAF1B	TATA-box binding protein associated factor, RNA polymerase I subunit B
227178_at	0.356904	0.00491	-2.89098	-2.13221	-0.630181	CELF2	CUGBP, Elav-like family member 2
204454_at	0.356904	0.00492	-2.89015	-2.13412	-0.486647	LDOC1	leucine zipper down-regulated in cancer 1
235779_at	0.356904	0.00492	-2.89015	-2.13412	-0.467083	ZNF790-AS1	ZNF790 antisense RNA 1
206940_s_at	0.356904	0.00492	2.89006	-2.13435	0.536147	POU4F1	POU class 4 homeobox 1
217829_s_at	0.356904	0.00493	2.8899	-2.13472	0.303818	USP39	ubiquitin specific peptidase 39
238506_at	0.356904	0.00493	2.88958	-2.13545	0.665432	LRRC58	leucine rich repeat containing 58
205419_at	0.356904	0.00494	-2.88907	-2.13665	-0.755203	GPR183	G protein-coupled receptor 183
244598_at	0.356904	0.00494	-2.88904	-2.13671	-0.622399	LCP2	lymphocyte cytosolic protein 2
217640_x_at	0.356904	0.00495	2.88842	-2.13815	0.985027	SKA1	spindle and kinetochore associated complex subunit 1
209980_s_at	0.356904	0.00495	2.88798	-2.13919	0.587522	MIR6778///SHMT1	microRNA 6778///serine hydroxymethyltransferase 1
224019_at	0.356904	0.00496	2.88752	-2.14024	0.167874	SCD5	stearoyl-CoA desaturase 5
212144_at	0.356904	0.00496	-2.88747	-2.14037	-0.42568	SUN2	Sad1 and UNC84 domain containing 2
1555108_at	0.357889	0.00498	2.88591	-2.144	0.237811	SLC10A7	solute carrier family 10 member 7
205133_s_at	0.357889	0.00499	2.88538	-2.14524	0.50919	HSPE1	heat shock protein family E (Hsp10) member 1
203176_s_at	0.357889	0.005	2.885	-2.1461	0.608793	TFAM	transcription factor A, mitochondrial
209669_s_at	0.357889	0.005	2.88469	-2.14684	0.348065	SERBP1	SERPINE1 mRNA binding protein 1
239675_at	0.358046	0.00501	2.88408	-2.14824	0.396271	LINC00900	long intergenic non-protein coding RNA 900
201198_s_at	0.358676	0.00503	2.88302	-2.15072	0.488633	PSMD1	proteasome 26S subunit, non-ATPase 1
209294_x_at	0.359435	0.00504	2.88178	-2.15359	0.437037	TNFRSF10B	TNF receptor superfamily member 10b
201585_s_at	0.359435	0.00506	2.88094	-2.15555	0.500907	SFPQ	splicing factor proline and glutamine rich
229894_s_at	0.359435	0.00506	-2.88093	-2.15558	-0.324567	RAB43	RAB43, member RAS oncogene family
208460_at	0.360335	0.00507	2.87961	-2.15864	0.319591	GJC1	gap junction protein gamma 1
205730_s_at	0.360443	0.00508	-2.87905	-2.15993	-0.36432	ABLIM3	actin binding LIM protein family member 3
220473_s_at	0.361493	0.0051	2.87759	-2.16333	0.453115	ZCCHC4	zinc finger CCHC-type containing 4
1553697_at	0.362253	0.00512	2.87641	-2.16607	0.36017	CCSAP	centriole, cilia and spindle associated protein
228402_at	0.364509	0.00517	2.87327	-2.17333	0.446639	ZBED3	zinc finger BED-type containing 3
37566_at	0.364509	0.00517	-2.87298	-2.17401	-0.252417	PHF24	PHD finger protein 24
1554086_at	0.364509	0.00518	2.87239	-2.17539	0.418753	TUBGCP3	tubulin gamma complex associated protein 3
206653_at	0.364509	0.0052	2.87116	-2.17823	0.594477	POLR3G	RNA polymerase III subunit G
215313_x_at	0.364509	0.0052	-2.87089	-2.17884	-0.290633	HLA-A	major histocompatibility complex, class I, A
231024_at	0.364509	0.0052	-2.8708	-2.17906	-0.714643	PGM5-AS1	PGM5 antisense RNA 1
210992_x_at	0.364509	0.0052	2.87078	-2.1791	1.25804	FCGR2C	Fc fragment of IgG receptor IIc (gene/pseudogene)
1554875_at	0.364509	0.00521	2.87066	-2.17938	0.599302	CAMKMT	calmodulin-lysine N-methyltransferase
226819_at	0.364807	0.00522	2.86949	-2.18208	0.347156	LSM11	LSM11, U7 small nuclear RNA associated
1552969_a_at	0.364807	0.00523	2.86929	-2.18255	0.356481	ZMYM6	zinc finger MYM-type containing 6
219528_s_at	0.364807	0.00523	-2.86904	-2.18313	-0.937287	BCL11B	B-cell CLL/lymphoma 11B
212844_at	0.365496	0.00525	2.86765	-2.18635	0.288534	RRP1B	ribosomal RNA processing 1B
212220_at	0.365496	0.00525	2.86749	-2.18671	0.892063	PSME4	proteasome activator subunit 4
227581_at	0.366001	0.00527	-2.86657	-2.18885	-0.28867	TECPR1	tectonin beta-propeller repeat containing 1
227177_at	0.36608	0.00528	-2.8658	-2.19063	-0.682446	CORO2A	coronin 2A
201596_x_at	0.36608	0.00529	-2.865	-2.19248	-0.529437	KRT18	keratin 18
216360_x_at	0.36608	0.00533	2.86266	-2.1979	0.390779	RRP12	ribosomal RNA processing 12 homolog
204256_at	0.36608	0.00534	2.86214	-2.19908	0.576905	ELOVL6	ELOVL fatty acid elongase 6
228563_at	0.36608	0.00534	2.86195	-2.19953	0.396181	GJC1	gap junction protein gamma 1
222555_s_at	0.36608	0.00534	2.86154	-2.20047	0.66299	MRPL44	mitochondrial ribosomal protein L44
1565635_at	0.36608	0.00535	-2.86149	-2.20058	-0.269373
230656_s_at	0.36608	0.00536	2.86087	-2.20202	0.412737	UTP4	UTP4, small subunit processome component
229429_x_at	0.36608	0.00537	-2.86014	-2.2037	-0.388763	LINC00623	long intergenic non-protein coding RNA 623
1555125_at	0.36608	0.00539	2.85871	-2.20701	0.461577	PAXBP1	PAX3 and PAX7 binding protein 1
212110_at	0.36608	0.0054	2.85806	-2.2085	0.533648	SLC39A14	solute carrier family 39 member 14
233344_x_at	0.36608	0.0054	2.85778	-2.20915	0.236784	WDR97	WD repeat domain 97
219272_at	0.36608	0.00541	-2.85718	-2.21055	-0.32973	TRIM62	tripartite motif containing 62
204247_s_at	0.36608	0.00542	2.85688	-2.21123	0.417804	CDK5	cyclin dependent kinase 5
227954_at	0.36608	0.00542	2.85665	-2.21175	0.535603	ITPRIPL2	inositol 1,4,5-trisphosphate receptor interacting protein like 2
224061_at	0.36608	0.00542	-2.85642	-2.21228	-0.53803	INMT	indolethylamine N-methyltransferase
224051_at	0.36608	0.00543	2.85621	-2.21277	0.221226
203297_s_at	0.36608	0.00543	-2.85574	-2.21385	-0.451215	JARID2	jumonji and AT-rich interaction domain containing 2
208724_s_at	0.36608	0.00544	2.85559	-2.2142	0.304159	RAB1A	RAB1A, member RAS oncogene family
234645_at	0.36608	0.00545	-2.85497	-2.21563	-0.685541
208050_s_at	0.36608	0.00545	2.85465	-2.21637	0.960988	CASP2	caspase 2
202746_at	0.36608	0.00545	-2.8545	-2.21671	-0.748729	ITM2A	integral membrane protein 2A
1553781_at	0.36608	0.00547	2.85374	-2.21848	0.259155	ZC3HAV1L	zinc finger CCCH-type containing, antiviral 1 like
1560547_at	0.36608	0.00547	-2.85342	-2.2192	-0.247337
213896_x_at	0.36608	0.00548	2.85291	-2.22038	0.411988	FAM149B1	family with sequence similarity 149 member B1
203703_s_at	0.36608	0.00548	2.85281	-2.22062	0.26043	TTLL4	tubulin tyrosine ligase like 4
215667_x_at	0.36608	0.00548	2.85258	-2.22114	0.415557	PMS2P9///PMS2P5	PMS1 homolog 2, mismatch repair system component pseudogene 9///PMS1 homolog 2, mismatch repair system component pseudogene 5
214722_at	0.36608	0.00549	-2.85227	-2.22185	-0.645119	NOTCH2NL	notch 2 N-terminal like
218575_at	0.36608	0.0055	2.85183	-2.22287	0.389726	LOC730268///ANAPC1	anaphase-promoting complex subunit 1-like///anaphase promoting complex subunit 1
230415_at	0.36608	0.0055	-2.85181	-2.22292	-0.62587
201772_at	0.36608	0.0055	2.8514	-2.22385	0.549974	AZIN1	antizyme inhibitor 1
204245_s_at	0.36608	0.00551	2.85087	-2.22507	0.303572	RPP14	ribonuclease P/MRP subunit p14
201892_s_at	0.36608	0.00553	2.84981	-2.22752	0.434206	IMPDH2	inosine monophosphate dehydrogenase 2
220658_s_at	0.36608	0.00553	2.84973	-2.22772	0.691483	ARNTL2	aryl hydrocarbon receptor nuclear translocator like 2
205762_s_at	0.36608	0.00554	2.84931	-2.22868	0.460377	DUS4L	dihydrouridine synthase 4 like
212038_s_at	0.36608	0.00554	2.84917	-2.22898	0.401277	VDAC1	voltage dependent anion channel 1
214891_at	0.36608	0.00555	-2.84858	-2.23036	-0.268063	FBXO21	F-box protein 21
233421_s_at	0.36608	0.00555	2.8484	-2.23077	0.566322	NUP133	nucleoporin 133
207813_s_at	0.36608	0.00555	2.84833	-2.23092	0.585422	FDXR	ferredoxin reductase
201511_at	0.36608	0.00555	2.84822	-2.23119	0.238267	AAMP	angio associated migratory cell protein
209790_s_at	0.36608	0.00556	2.84753	-2.23276	0.486479	CASP6	caspase 6
218380_at	0.36608	0.00557	-2.84723	-2.23347	-0.673982	LOC728392	uncharacterized LOC728392
241957_x_at	0.36608	0.00557	-2.8471	-2.23375	-0.405403	LIN7B	lin-7 homolog B, crumbs cell polarity complex component
213230_at	0.36608	0.00558	2.84666	-2.23478	0.256906	CDR2L	cerebellar degeneration related protein 2 like
208900_s_at	0.36608	0.00558	2.84658	-2.23495	0.753915	TOP1	topoisomerase (DNA) I
202755_s_at	0.36608	0.00558	2.84648	-2.23518	0.351249	GPC1	glypican 1
209583_s_at	0.36608	0.00559	-2.84599	-2.23632	-0.643165	CD200	CD200 molecule
200874_s_at	0.36608	0.00559	2.84559	-2.23724	0.325717	MIR1292///SNORD110///SNORD86///SNORD57///NOP56	microRNA 1292///small nucleolar RNA, C/D box 110///small nucleolar RNA, C/D box 86///small nucleolar RNA, C/D box 57///NOP56 ribonucleoprotein
219258_at	0.36608	0.0056	2.84538	-2.23771	0.591319	TIPIN	TIMELESS interacting protein
218377_s_at	0.366781	0.00561	2.84429	-2.24022	0.357428	RWDD2B	RWD domain containing 2B
1568877_a_at	0.366926	0.00562	2.84373	-2.2415	0.49149	ACBD5	acyl-CoA binding domain containing 5
211787_s_at	0.367012	0.00563	2.84323	-2.24265	0.337183	LOC101928634///SENP3-EIF4A1///SNORD10///SNORA48///SNORA67///EIF4A1	uncharacterized LOC101928634///SENP3-EIF4A1 readthrough (NMD candidate)///small nucleolar RNA, C/D box 10///small nucleolar RNA, H/ACA box 48///small nucleolar RNA, H/ACA box 67///eukaryotic translation initiation factor 4A1
232670_at	0.367837	0.00565	-2.84203	-2.24541	-0.495107	LOC149401	uncharacterized LOC149401
228559_at	0.369008	0.00568	2.84008	-2.24989	0.675572	CENPN	centromere protein N
200966_x_at	0.369008	0.00569	2.83976	-2.25062	0.460169	ALDOA	aldolase, fructose-bisphosphate A
222844_s_at	0.369008	0.00569	2.83935	-2.25156	0.562741	SRR	serine racemase
227805_at	0.369008	0.0057	2.83925	-2.2518	0.524395	METAP1D	methionyl aminopeptidase type 1D (mitochondrial)
201634_s_at	0.369463	0.00571	2.8384	-2.25375	0.515354	CYB5B	cytochrome b5 type B
205343_at	0.36956	0.00572	2.83757	-2.25566	0.516562	SULT1C2	sulfotransferase family 1C member 2
1566967_at	0.36956	0.00573	-2.83748	-2.25586	-0.336054	SPRY4-IT1	SPRY4 intronic transcript 1
209827_s_at	0.369602	0.00573	-2.83702	-2.2569	-0.374095	IL16	interleukin 16
219306_at	0.3701	0.00575	2.83569	-2.25996	0.627981	KIF15	kinesin family member 15
214875_x_at	0.3701	0.00576	2.83543	-2.26055	0.52701	APLP2	amyloid beta precursor like protein 2
216883_x_at	0.3701	0.00576	2.83506	-2.26141	0.297566	PDE6D	phosphodiesterase 6D
205456_at	0.3701	0.00577	-2.8349	-2.26178	-0.726234	CD3E	CD3e molecule
235778_s_at	0.370271	0.00578	2.83411	-2.26358	0.618735	ANKRD44	ankyrin repeat domain 44
235447_at	0.370271	0.00578	2.83391	-2.26404	0.497217	TRUB1	TruB pseudouridine synthase family member 1
232140_at	0.370606	0.0058	-2.83316	-2.26575	-0.385287	FRG1HP	FSHD region gene 1 family member H, pseudogene
205497_at	0.370606	0.0058	-2.83277	-2.26665	-0.446519	ZNF175	zinc finger protein 175
221981_s_at	0.371538	0.00583	2.83128	-2.27008	0.354173	WDR59	WD repeat domain 59
217859_s_at	0.371538	0.00583	2.83107	-2.27055	0.658343	SLC39A9	solute carrier family 39 member 9
212281_s_at	0.372124	0.00586	2.82953	-2.27409	0.648189	TMEM97	transmembrane protein 97
213320_at	0.372124	0.00586	2.82908	-2.2751	0.63502	PRMT3	protein arginine methyltransferase 3
205593_s_at	0.372124	0.00586	-2.82903	-2.27521	-0.424828	PDE9A	phosphodiesterase 9A
206308_at	0.372124	0.00588	2.82823	-2.27706	0.514786	TRDMT1	tRNA aspartic acid methyltransferase 1
1555090_x_at	0.372124	0.00588	2.82789	-2.27784	0.345256	TMEM182	transmembrane protein 182
214550_s_at	0.372124	0.00589	2.82753	-2.27865	0.5292	TNPO3	transportin 3
225387_at	0.372124	0.00589	-2.82735	-2.27908	-0.623464	TSPAN5	tetraspanin 5
201830_s_at	0.372124	0.00589	2.82725	-2.27929	0.841936	NET1	neuroepithelial cell transforming 1
1553301_a_at	0.373136	0.00592	2.8258	-2.28262	0.527001	TMEM182	transmembrane protein 182
206159_at	0.373136	0.00592	-2.82548	-2.28333	-0.366045	GDF10	growth differentiation factor 10
226060_at	0.374504	0.00596	2.82349	-2.28789	0.407186	RFT1	RFT1 homolog
205510_s_at	0.374504	0.00596	-2.82338	-2.28813	-0.443355	FLJ10038	uncharacterized protein FLJ10038
223785_at	0.374788	0.00598	2.82242	-2.29035	0.639409	FANCI	Fanconi anemia complementation group I
217496_s_at	0.374788	0.00598	2.82231	-2.29059	0.50246	IDE	insulin degrading enzyme
226508_at	0.375126	0.00599	-2.8215	-2.29245	-0.480487	PHC3	polyhomeotic homolog 3
211608_at	0.375126	0.006	-2.82118	-2.29316	-0.462855
237461_at	0.3753	0.00601	2.82062	-2.29445	0.84064	NLRP7	NLR family pyrin domain containing 7
221816_s_at	0.375751	0.00602	-2.81956	-2.29687	-0.316301	PHF11	PHD finger protein 11
207528_s_at	0.375751	0.00603	2.81939	-2.29726	0.322374	SLC7A11	solute carrier family 7 member 11
1553148_a_at	0.376537	0.00605	2.81818	-2.30001	0.65991	SNX13	sorting nexin 13
221650_s_at	0.376537	0.00605	2.81779	-2.3009	0.547122	LOC100996782///MED18	mediator of RNA polymerase II transcription subunit 18-like///mediator complex subunit 18
213632_at	0.376537	0.00606	2.81745	-2.30169	0.349993	DHODH	dihydroorotate dehydrogenase (quinone)
225431_x_at	0.376782	0.00607	2.81682	-2.30312	0.688659	PM20D2	peptidase M20 domain containing 2
213677_s_at	0.376855	0.00608	2.81635	-2.30419	0.421152	PMS1	PMS1 homolog 1, mismatch repair system component
217488_x_at	0.377363	0.0061	2.81529	-2.3066	0.356516	PMS2P3	PMS1 homolog 2, mismatch repair system component pseudogene 3
241360_at	0.377363	0.0061	2.81508	-2.3071	0.478547	CCDC15	coiled-coil domain containing 15
244492_at	0.377566	0.00611	-2.81447	-2.30847	-0.238022
224484_s_at	0.377566	0.00612	2.81409	-2.30935	0.524195	BRMS1L	breast cancer metastasis-suppressor 1-like
217097_s_at	0.378056	0.00614	2.81309	-2.31162	0.75358	PHTF2	putative homeodomain transcription factor 2
212330_at	0.378056	0.00614	2.81271	-2.31248	0.466964	TFDP1	transcription factor Dp-1
37892_at	0.378056	0.00616	2.81149	-2.31526	1.13044	COL11A1	collagen type XI alpha 1 chain
225082_at	0.378056	0.00617	2.81132	-2.31566	0.399008	CPSF3	cleavage and polyadenylation specific factor 3
200708_at	0.378056	0.00617	2.81115	-2.31605	0.596813	GOT2	glutamic-oxaloacetic transaminase 2
217166_at	0.378056	0.00618	2.8108	-2.31683	0.259184
225113_at	0.378056	0.00618	2.81077	-2.31691	0.602296	AGPS	alkylglycerone phosphate synthase
240978_at	0.378056	0.00618	-2.81046	-2.31762	-0.242051
58367_s_at	0.378413	0.0062	-2.80949	-2.31981	-0.223608	ZNF419	zinc finger protein 419
1294_at	0.378413	0.0062	-2.80926	-2.32033	-0.478727	MIR5193///UBA7	microRNA 5193///ubiquitin like modifier activating enzyme 7
212142_at	0.378413	0.00621	2.80894	-2.32107	0.838956	MCM4	minichromosome maintenance complex component 4
214982_at	0.378651	0.00622	2.80832	-2.32248	0.226952	LOC101929240///SNRNP200	U5 small nuclear ribonucleoprotein 200 kDa helicase pseudogene///small nuclear ribonucleoprotein U5 subunit 200
221962_s_at	0.378808	0.00625	2.80649	-2.32664	0.599946	UBE2H	ubiquitin conjugating enzyme E2 H
230450_at	0.378808	0.00626	2.80628	-2.32713	0.487223	SEPT7-AS1	SEPT7 antisense RNA 1 (head to head)
210759_s_at	0.378808	0.00626	2.8062	-2.3273	0.314709	PSMA1	proteasome subunit alpha 1
208499_s_at	0.378808	0.00627	2.80567	-2.32852	0.567916	DNAJC3	DnaJ heat shock protein family (Hsp40) member C3
210038_at	0.378808	0.00627	-2.80522	-2.32953	-0.654791	PRKCQ	protein kinase C theta
210821_x_at	0.378808	0.00628	2.80501	-2.33	0.446012	CENPA	centromere protein A
228346_at	0.378808	0.00628	-2.80481	-2.33047	-0.542121	ZNF844	zinc finger protein 844
225254_at	0.378808	0.00629	-2.80441	-2.33137	-0.219036	CCDC97	coiled-coil domain containing 97
210404_x_at	0.378808	0.00629	2.80426	-2.3317	0.460576	CAMK2B	calcium/calmodulin dependent protein kinase II beta
207332_s_at	0.378808	0.00629	2.80426	-2.33171	0.748841	TFRC	transferrin receptor
1557385_at	0.378844	0.0063	2.8035	-2.33344	0.295763	FAM161A	family with sequence similarity 161 member A
216316_x_at	0.378844	0.00631	2.80345	-2.33356	0.511809	GK6P	glycerol kinase 6 pseudogene
238944_at	0.380245	0.00634	-2.80139	-2.33822	-0.606551	LOC100505715	uncharacterized LOC100505715
218393_s_at	0.380245	0.00634	2.80136	-2.33829	0.428083	SMU1	DNA replication regulator and spliceosomal factor
244734_at	0.380385	0.00635	2.80085	-2.33947	0.602754	MTHFSD	methenyltetrahydrofolate synthetase domain containing
201609_x_at	0.3816	0.00638	2.79933	-2.34291	0.365618	ICMT	isoprenylcysteine carboxyl methyltransferase
201938_at	0.381645	0.00639	2.79852	-2.34474	0.424316	CDK2AP1	cyclin dependent kinase 2 associated protein 1
218726_at	0.381645	0.0064	2.79845	-2.3449	0.718377	HJURP	Holliday junction recognition protein
241606_s_at	0.381645	0.0064	2.79807	-2.34577	0.459271	TRUB1	TruB pseudouridine synthase family member 1
237442_at	0.381645	0.00642	-2.79709	-2.348	-0.547044
213811_x_at	0.381645	0.00642	2.79706	-2.34806	0.420576	TCF3	transcription factor 3
238996_x_at	0.381645	0.00642	2.79697	-2.34827	0.565314	ALDOA	aldolase, fructose-bisphosphate A
206437_at	0.381849	0.00644	-2.79614	-2.35015	-0.534402	S1PR4	sphingosine-1-phosphate receptor 4
235273_at	0.381849	0.00645	2.79547	-2.35166	0.510452	DYX1C1	dyslexia susceptibility 1 candidate 1
1563389_at	0.381849	0.00645	2.7953	-2.35205	0.289345	TH2LCRR	T helper type 2 locus control region associated RNA
209152_s_at	0.381849	0.00646	2.79504	-2.35264	0.497199	TCF3	transcription factor 3
201459_at	0.381849	0.00646	2.79463	-2.35356	0.293195	RUVBL2	RuvB like AAA ATPase 2
223641_at	0.381849	0.00647	-2.79429	-2.35433	-0.598147
218768_at	0.381849	0.00648	2.79401	-2.35498	0.449749	NUP107	nucleoporin 107
213681_at	0.381849	0.00648	-2.79363	-2.35582	-0.23804	CYHR1	cysteine and histidine rich 1
218897_at	0.381849	0.0065	2.79264	-2.35807	0.525627	TMEM177	transmembrane protein 177
219399_at	0.381849	0.0065	2.79264	-2.35809	0.586184	LIN7C	lin-7 homolog C, crumbs cell polarity complex component
209157_at	0.381849	0.00651	2.79237	-2.3587	0.546043	DNAJA2	DnaJ heat shock protein family (Hsp40) member A2
219204_s_at	0.381849	0.00651	2.79204	-2.35944	0.617585	SRR	serine racemase
225737_s_at	0.381849	0.00652	2.79165	-2.36032	0.435045	FBXO22	F-box protein 22
215158_s_at	0.381849	0.00652	-2.79142	-2.36083	-0.290172	DEDD	death effector domain containing
1559315_s_at	0.382796	0.00655	-2.79016	-2.36368	-0.298685	SOCS2-AS1	SOCS2 antisense RNA 1
206840_at	0.38302	0.00657	2.78864	-2.36713	0.31039	AFM	afamin
234000_s_at	0.38302	0.00658	2.78817	-2.3682	0.624042	HACD3	3-hydroxyacyl-CoA dehydratase 3
200751_s_at	0.38302	0.00659	2.7876	-2.36947	0.468389	HNRNPC	heterogeneous nuclear ribonucleoprotein C (C1/C2)
242110_at	0.38302	0.0066	-2.78734	-2.37007	-0.843962
202170_s_at	0.38302	0.0066	2.78719	-2.37042	0.491551	AASDHPPT	aminoadipate-semialdehyde dehydrogenase-phosphopantetheinyl transferase
218582_at	0.38302	0.0066	2.78716	-2.37048	0.375058	2021-03-05	membrane associated ring-CH-type finger 5
205531_s_at	0.38302	0.00661	-2.78671	-2.3715	-0.35297	GLS2	glutaminase 2
226697_at	0.38302	0.00661	2.78662	-2.37171	0.543992	FAM114A1	family with sequence similarity 114 member A1
228316_at	0.38302	0.00661	2.78655	-2.37185	0.60835	CLHC1	clathrin heavy chain linker domain containing 1
228258_at	0.383912	0.00664	-2.785	-2.37536	-0.548811	TBC1D10C	TBC1 domain family member 10C
1554813_at	0.383912	0.00664	-2.78498	-2.37542	-0.213694
229746_x_at	0.384106	0.00666	2.7841	-2.3774	0.455944	CEBPZOS	CEBPZ opposite strand
205123_s_at	0.384106	0.00666	2.78395	-2.37774	0.372019	MSANTD3-TMEFF1///TMEFF1	MSANTD3-TMEFF1 readthrough///transmembrane protein with EGF like and two follistatin like domains 1
242422_at	0.384106	0.00667	2.78351	-2.37873	0.841686	G3BP1	G3BP stress granule assembly factor 1
222578_s_at	0.384106	0.00668	2.78321	-2.37941	0.354656	UBA5	ubiquitin like modifier activating enzyme 5
208932_at	0.384106	0.00668	2.78288	-2.38015	0.436133	PPP4C	protein phosphatase 4 catalytic subunit
234464_s_at	0.384106	0.0067	2.78216	-2.38179	0.819224	EME1	essential meiotic structure-specific endonuclease 1
214032_at	0.384106	0.00671	-2.7814	-2.38349	-0.692854	ZAP70	zeta chain of T cell receptor associated protein kinase 70
222707_s_at	0.384106	0.00671	2.78129	-2.38374	0.23862	ACTR8	ARP8 actin-related protein 8 homolog
215708_s_at	0.384106	0.00672	2.78078	-2.38489	0.748973	PRIM2B///PRIM2	primase (DNA) subunit 2 pseudogene///primase (DNA) subunit 2
217322_x_at	0.384106	0.00673	2.78036	-2.38584	0.382186
220789_s_at	0.384106	0.00673	2.78014	-2.38633	0.385122	SNORA5B///TBRG4	small nucleolar RNA, H/ACA box 5B///transforming growth factor beta regulator 4
1554410_a_at	0.384106	0.00674	2.77981	-2.38709	0.451872	RCC1L	RCC1 like
212432_at	0.384106	0.00675	2.77912	-2.38863	0.27704	GRPEL1	GrpE like 1, mitochondrial
209811_at	0.384106	0.00676	2.77867	-2.38966	1.1136	CASP2	caspase 2
243146_at	0.384106	0.00676	2.77848	-2.39008	0.313158
225485_at	0.384106	0.00677	2.77847	-2.39011	0.544013	CEP41	centrosomal protein 41
37793_r_at	0.384106	0.00677	2.77846	-2.39013	0.386882	RAD51D	RAD51 paralog D
235177_at	0.384728	0.00679	2.7771	-2.3932	0.663717	METTL21A	methyltransferase like 21A
219556_at	0.384728	0.00682	2.77585	-2.39601	0.262755	C16orf59	chromosome 16 open reading frame 59
216913_s_at	0.384728	0.00682	2.7758	-2.39613	0.393856	RRP12	ribosomal RNA processing 12 homolog
213888_s_at	0.384728	0.00682	-2.77554	-2.3967	-0.617307	TRAF3IP3	TRAF3 interacting protein 3
219659_at	0.384728	0.00684	-2.77458	-2.39887	-0.375691	ATP8A2	ATPase phospholipid transporting 8A2
221881_s_at	0.384728	0.00684	2.77456	-2.39893	0.83063	CLIC4	chloride intracellular channel 4
203328_x_at	0.384728	0.00685	2.77404	-2.40008	0.425919	IDE	insulin degrading enzyme
235635_at	0.384728	0.00685	-2.77404	-2.40009	-0.539788	ARHGAP5	Rho GTPase activating protein 5
210787_s_at	0.384728	0.00685	2.77392	-2.40036	0.553282	CAMKK2	calcium/calmodulin dependent protein kinase kinase 2
210892_s_at	0.384728	0.00686	2.77367	-2.40093	1.01715	GTF2I	general transcription factor IIi
209743_s_at	0.384728	0.00686	2.77336	-2.40163	0.417182	ITCH	itchy E3 ubiquitin protein ligase
204813_at	0.384728	0.00687	2.77313	-2.40215	0.847618	MAPK10	mitogen-activated protein kinase 10
226273_at	0.384728	0.00687	2.77311	-2.40219	0.382597	CLCN5	chloride voltage-gated channel 5
237918_at	0.384794	0.00688	-2.77231	-2.404	-0.244509
1553703_at	0.384794	0.00689	-2.77218	-2.40428	-0.544142	ZNF791	zinc finger protein 791
226616_s_at	0.384794	0.00689	2.77195	-2.40479	0.474738	NDUFV3	NADH:ubiquinone oxidoreductase subunit V3
212627_s_at	0.384806	0.0069	2.77158	-2.40564	0.358292	EXOSC7	exosome component 7
209881_s_at	0.386451	0.00695	-2.76887	-2.41172	-0.675111	LAT	linker for activation of T-cells
204147_s_at	0.386451	0.00695	2.7688	-2.4119	0.579463	TFDP1	transcription factor Dp-1
237199_at	0.386451	0.00695	-2.7687	-2.41211	-0.237554
242238_at	0.386451	0.00696	-2.7686	-2.41233	-0.285879	NUDCD3	NudC domain containing 3
222615_s_at	0.386787	0.00697	2.76793	-2.41384	0.312046	LOC100630923///LOC100289561///PRKRIP1	LOC100289561-PRKRIP1 readthrough///uncharacterized LOC100289561///PRKR interacting protein 1 (IL11 inducible)
200700_s_at	0.387054	0.00698	2.76732	-2.41521	0.472743	KDELR2	KDEL endoplasmic reticulum protein retention receptor 2
205440_s_at	0.387181	0.007	-2.76651	-2.41704	-1.27858	NPY1R	neuropeptide Y receptor Y1
216242_x_at	0.387181	0.007	2.76648	-2.4171	0.343068	UPK3BL///POLR2J3///POLR2J2///POLR2J4///POLR2J	uroplakin 3B-like///RNA polymerase II subunit J3///RNA polymerase II subunit J2///RNA polymerase II subunit J4, pseudogene///RNA polymerase II subunit J
212798_s_at	0.38762	0.00701	2.76572	-2.41882	0.276323	ANKMY2	ankyrin repeat and MYND domain containing 2
218602_s_at	0.388243	0.00703	2.76454	-2.42146	0.493594	HAUS6	HAUS augmin like complex subunit 6
1561911_at	0.388243	0.00704	2.76442	-2.42173	0.165405
1559975_at	0.388308	0.00705	-2.764	-2.42268	-0.501693	BTG1	BTG anti-proliferation factor 1
215711_s_at	0.389022	0.00708	2.76205	-2.42705	0.738742	WEE1	WEE1 G2 checkpoint kinase
222608_s_at	0.389022	0.00709	2.76167	-2.4279	1.07571	ANLN	anillin actin binding protein
200993_at	0.389022	0.0071	2.76111	-2.42917	0.470161	IPO7	importin 7
207243_s_at	0.389022	0.00711	2.76068	-2.43013	0.193563	CALM3///CALM2///CALM1	calmodulin 3///calmodulin 2///calmodulin 1
201456_s_at	0.389022	0.00712	2.76034	-2.43089	0.567476	BUB3	BUB3, mitotic checkpoint protein
224444_s_at	0.389022	0.00713	2.75989	-2.4319	0.704454	LINC00467	long intergenic non-protein coding RNA 467
243404_at	0.389022	0.00713	-2.75989	-2.43191	-0.46041
229431_at	0.389022	0.00713	2.75956	-2.43265	0.611701	RFXAP	regulatory factor X associated protein
201272_at	0.389022	0.00713	2.75954	-2.43269	0.458867	AKR1B1	aldo-keto reductase family 1 member B
205544_s_at	0.389022	0.00713	-2.75948	-2.43282	-1.07843	CR2	complement component 3d receptor 2
204127_at	0.389022	0.00714	2.7594	-2.433	0.764476	RFC3	replication factor C subunit 3
229946_at	0.390668	0.00718	2.75721	-2.4379	0.422869	FAM168B	family with sequence similarity 168 member B
219095_at	0.390668	0.00719	-2.75684	-2.43875	-0.242848	PLA2G4B///JMJD7-PLA2G4B	phospholipase A2 group IVB///JMJD7-PLA2G4B readthrough
203975_s_at	0.390668	0.00719	2.75683	-2.43878	0.413501	CHAF1A	chromatin assembly factor 1 subunit A
225040_s_at	0.392296	0.00723	2.75473	-2.44347	0.543094	RPE	ribulose-5-phosphate-3-epimerase
220123_at	0.392296	0.00724	2.75429	-2.44447	0.629878	SLC35F5	solute carrier family 35 member F5
203281_s_at	0.392296	0.00724	-2.75419	-2.44469	-0.528652	MIR5193///UBA7	microRNA 5193///ubiquitin like modifier activating enzyme 7
200950_at	0.392296	0.00726	2.7533	-2.44667	0.460486	ARPC1A	actin related protein 2/3 complex subunit 1A
238158_at	0.392296	0.00726	2.75323	-2.44684	0.382382	MEIG1	meiosis/spermiogenesis associated 1
200924_s_at	0.392296	0.00726	2.75321	-2.44688	0.335174	SLC3A2	solute carrier family 3 member 2
220485_s_at	0.393638	0.00729	-2.75163	-2.45041	-0.778899	SIRPG	signal regulatory protein gamma
221978_at	0.393681	0.00731	-2.7508	-2.45228	-0.675213	HLA-F	major histocompatibility complex, class I, F
229715_at	0.393681	0.00732	2.75026	-2.45347	0.332267	NCR3LG1	natural killer cell cytotoxicity receptor 3 ligand 1
201297_s_at	0.393681	0.00733	2.74993	-2.45422	0.522867	MOB1A	MOB kinase activator 1A
201528_at	0.393681	0.00733	2.74988	-2.45434	0.364955	RPA1	replication protein A1
204226_at	0.393681	0.00733	2.74973	-2.45467	0.489551	STAU2	staufen double-stranded RNA binding protein 2
214394_x_at	0.393681	0.00734	-2.74948	-2.45523	-0.225325	EEF1D	eukaryotic translation elongation factor 1 delta
217909_s_at	0.394365	0.00736	2.7485	-2.45741	0.412996	MLX	MLX, MAX dimerization protein
235325_at	0.394948	0.00738	2.74747	-2.45973	0.396542	LOC101930112///SPG7	uncharacterized LOC101930112///SPG7, paraplegin matrix AAA peptidase subunit
1565698_at	0.394948	0.00739	2.74707	-2.46061	0.186757	HECTD2	HECT domain E3 ubiquitin protein ligase 2
211602_s_at	0.394948	0.00739	2.74677	-2.46129	0.443708	TRPC1	transient receptor potential cation channel subfamily C member 1
222837_s_at	0.394948	0.0074	2.74623	-2.46248	0.818464	NAA15	N(alpha)-acetyltransferase 15, NatA auxiliary subunit
215253_s_at	0.394948	0.0074	2.74622	-2.46252	0.382613	RCAN1	regulator of calcineurin 1
1553338_at	0.395416	0.00742	2.74544	-2.46425	0.61346	SDE2	SDE2 telomere maintenance homolog
207860_at	0.39685	0.00745	-2.74379	-2.46793	-0.324771	NCR1	natural cytotoxicity triggering receptor 1
206369_s_at	0.397601	0.00748	2.7426	-2.47061	0.722441	PIK3CG	phosphatidylinositol-4,5-bisphosphate 3-kinase catalytic subunit gamma
233080_s_at	0.397601	0.00748	2.74242	-2.471	0.512457	PRPF40A	pre-mRNA processing factor 40 homolog A
222985_at	0.397931	0.0075	2.74177	-2.47245	0.360949	YWHAG	tyrosine 3-monooxygenase/tryptophan 5-monooxygenase activation protein gamma
1558305_at	0.398025	0.00751	2.74134	-2.47341	0.573587	GIGYF2	GRB10 interacting GYF protein 2
209825_s_at	0.398267	0.00752	2.74077	-2.47468	0.386525	MIR3658///UCK2	microRNA 3658///uridine-cytidine kinase 2
243502_at	0.398375	0.00753	2.74033	-2.47567	0.270285	GJC1	gap junction protein gamma 1
200691_s_at	0.399273	0.00755	2.73909	-2.47843	0.549847	HSPA9	heat shock protein family A (Hsp70) member 9
223621_at	0.399273	0.00756	-2.73879	-2.47909	-0.307967	PNMA3	paraneoplastic Ma antigen 3
226488_at	0.399273	0.00757	2.73847	-2.4798	0.416291	RCCD1	RCC1 domain containing 1
204871_at	0.399902	0.00759	2.73736	-2.48228	0.383432	MTERF1	mitochondrial transcription termination factor 1
223888_s_at	0.399902	0.00761	2.73651	-2.48418	0.515269	LARS	leucyl-tRNA synthetase
206383_s_at	0.399902	0.00761	2.73626	-2.48473	0.644748	G3BP2	G3BP stress granule assembly factor 2
210707_x_at	0.399902	0.00762	2.73606	-2.48519	0.35446	DTX2P1-UPK3BP1-PMS2P11	DTX2P1-UPK3BP1-PMS2P11 readthrough, transcribed pseudogene
203466_at	0.399902	0.00762	2.7358	-2.48575	0.345189	MPV17	MPV17, mitochondrial inner membrane protein
225830_at	0.399902	0.00763	2.73552	-2.48639	0.433842	PDZD8	PDZ domain containing 8
209075_s_at	0.399902	0.00763	-2.73519	-2.48712	-0.29835	ISCU	iron-sulfur cluster assembly enzyme
218396_at	0.399902	0.00764	-2.73514	-2.48723	-0.558117	VPS13C	vacuolar protein sorting 13 homolog C
230792_at	0.399902	0.00764	-2.73474	-2.48812	-0.456444	FAAH2	fatty acid amide hydrolase 2
228597_at	0.399902	0.00766	2.73407	-2.48962	0.726204	MIS18A	MIS18 kinetochore protein A
215843_s_at	0.399902	0.00766	2.73401	-2.48975	0.348126	TLL2	tolloid like 2
210559_s_at	0.399902	0.00767	2.73335	-2.49121	0.795396	CDK1	cyclin dependent kinase 1
214735_at	0.399902	0.00767	-2.73334	-2.49125	-0.788946	IPCEF1	interaction protein for cytohesin exchange factors 1
226313_at	0.399902	0.00769	-2.73278	-2.49248	-0.277653	C10orf35	chromosome 10 open reading frame 35
1554012_at	0.399902	0.0077	2.7321	-2.494	0.168066	RSPO2	R-spondin 2
217218_at	0.399902	0.00771	2.73157	-2.49518	0.398867	WAPL	WAPL cohesin release factor
1554736_at	0.399902	0.00773	-2.73094	-2.49658	-0.201663	ARHGAP29	Rho GTPase activating protein 29
210256_s_at	0.399902	0.00773	2.73084	-2.49681	0.65687	PIP5K1A	phosphatidylinositol-4-phosphate 5-kinase type 1 alpha
216508_x_at	0.399902	0.00773	2.73078	-2.49694	0.421429
202992_at	0.399902	0.00773	-2.7307	-2.49711	-1.23497	C7	complement component 7
201992_s_at	0.399902	0.00774	2.73022	-2.49817	0.685231	KIF5B	kinesin family member 5B
232234_at	0.399902	0.00775	-2.7296	-2.49957	-0.448449	SLA2	Src like adaptor 2
218008_at	0.399902	0.00776	2.7293	-2.50023	0.285497	TMEM248	transmembrane protein 248
201299_s_at	0.399902	0.00777	2.72883	-2.50127	0.73947	MOB1A	MOB kinase activator 1A
237231_at	0.399902	0.00777	-2.7288	-2.50134	-0.233956
213568_at	0.399902	0.00777	2.72879	-2.50135	0.591478	OSR2	odd-skipped related transciption factor 2
213523_at	0.399902	0.00779	2.72788	-2.50339	0.482867	CCNE1	cyclin E1
220089_at	0.399902	0.00779	2.72786	-2.50342	0.350754	L2HGDH	L-2-hydroxyglutarate dehydrogenase
233208_x_at	0.399902	0.0078	2.72765	-2.50389	0.616055	CPSF2	cleavage and polyadenylation specific factor 2
201065_s_at	0.399902	0.0078	2.72763	-2.50393	0.461016	GTF2IP4///GTF2IP1///GTF2I	general transcription factor IIi pseudogene 4///general transcription factor IIi pseudogene 1///general transcription factor IIi
213365_at	0.400136	0.00781	2.72709	-2.50515	0.548247	ERI2	ERI1 exoribonuclease family member 2
214639_s_at	0.400177	0.00782	2.72645	-2.50655	0.800533	HOXA1	homeobox A1
219207_at	0.400177	0.00782	2.72637	-2.50673	0.434484	EDC3	enhancer of mRNA decapping 3
202143_s_at	0.400765	0.00784	2.72551	-2.50865	0.321027	COPS8	COP9 signalosome subunit 8
219004_s_at	0.40135	0.00786	2.72464	-2.51057	0.571618	MIS18A	MIS18 kinetochore protein A
214465_at	0.401684	0.00788	2.72401	-2.51198	0.640509	ORM2///ORM1	orosomucoid 2///orosomucoid 1
226759_at	0.401806	0.00789	-2.72345	-2.51322	-0.504021	IKZF4	IKAROS family zinc finger 4
208643_s_at	0.401806	0.00789	2.72323	-2.51372	0.354296	XRCC5	X-ray repair cross complementing 5
51146_at	0.403653	0.00795	2.72063	-2.51947	0.530624	PIGV	phosphatidylinositol glycan anchor biosynthesis class V
239215_at	0.403653	0.00795	2.72048	-2.51981	0.410423	LOC100289495	uncharacterized LOC100289495
203465_at	0.403653	0.00795	2.72042	-2.51995	0.64475	MRPL19	mitochondrial ribosomal protein L19
232333_at	0.403653	0.00796	-2.72023	-2.52036	-0.793941
211877_s_at	0.403777	0.00797	2.71978	-2.52135	0.217169	PCDHGA11///PCDHGC3	protocadherin gamma subfamily A, 11///protocadherin gamma subfamily C, 3
216409_at	0.40404	0.00798	-2.71921	-2.52262	-0.23971	ACSL6	acyl-CoA synthetase long-chain family member 6
1558794_at	0.404051	0.00799	2.71871	-2.52373	0.483912	NUTM2A-AS1	NUTM2A antisense RNA 1
202311_s_at	0.404051	0.008	2.7182	-2.52487	1.17266	COL1A1	collagen type I alpha 1 chain
208297_s_at	0.404051	0.00801	2.71791	-2.5255	0.297374	EVI5	ecotropic viral integration site 5
231917_at	0.404051	0.00801	2.71787	-2.5256	0.365224	GFM2	G elongation factor mitochondrial 2
205565_s_at	0.404361	0.00803	2.71692	-2.52771	0.487035	FXN	frataxin
208002_s_at	0.404361	0.00804	2.71641	-2.52883	0.487046	ACOT7	acyl-CoA thioesterase 7
205195_at	0.404361	0.00805	2.71629	-2.52909	0.546765	AP1S1	adaptor related protein complex 1 sigma 1 subunit
208811_s_at	0.404361	0.00806	2.71576	-2.53027	0.461827	TMEM135///DNAJB6	transmembrane protein 135///DnaJ heat shock protein family (Hsp40) member B6
221704_s_at	0.404361	0.00807	-2.71507	-2.53179	-0.567118	VPS37B	VPS37B, ESCRT-I subunit
223758_s_at	0.404361	0.00808	2.71479	-2.53241	0.562405	GTF2H2C///GTF2H2B///GTF2H2	GTF2H2 family member C///general transcription factor IIH subunit 2B (pseudogene)///general transcription factor IIH subunit 2
238578_at	0.404361	0.00808	2.7147	-2.53261	0.479135	TMEM182	transmembrane protein 182
219251_s_at	0.404361	0.00809	2.71447	-2.53313	0.289548	WDR60	WD repeat domain 60
227883_at	0.404361	0.00809	2.71435	-2.5334	0.40962	CCDC71L	coiled-coil domain containing 71-like
240677_at	0.404361	0.00809	-2.71427	-2.53356	-0.27595	ZC3H10	zinc finger CCCH-type containing 10
221767_x_at	0.40478	0.00811	2.71357	-2.53512	0.372522	HDLBP	high density lipoprotein binding protein
236982_at	0.404958	0.00812	-2.71308	-2.5362	-0.321128
225707_at	0.406575	0.00816	2.71131	-2.54012	0.545781	ARL6IP6	ADP ribosylation factor like GTPase 6 interacting protein 6
216566_at	0.406645	0.00817	-2.71092	-2.54098	-0.248901	IGLL5///IGLV@	immunoglobulin lambda like polypeptide 5///immunoglobulin lambda variable cluster
201231_s_at	0.407014	0.00819	2.70987	-2.54329	0.391237	ENO1	enolase 1
220956_s_at	0.407014	0.0082	-2.7093	-2.54456	-0.243467	RAB4B-EGLN2///EGLN2	RAB4B-EGLN2 readthrough (NMD candidate)///egl-9 family hypoxia inducible factor 2
227171_at	0.407014	0.00821	2.70919	-2.54481	0.392845	CCT4	chaperonin containing TCP1 subunit 4
204818_at	0.407014	0.00822	-2.70875	-2.54578	-0.217917	HSD17B2	hydroxysteroid 17-beta dehydrogenase 2
214045_at	0.407014	0.00822	2.7085	-2.54633	0.588366	LIAS	lipoic acid synthetase
221729_at	0.407014	0.00822	2.70837	-2.54662	1.06429	COL5A2	collagen type V alpha 2 chain
238454_at	0.407014	0.00826	-2.70697	-2.54972	-0.502204	ZNF540	zinc finger protein 540
1559101_at	0.407014	0.00826	-2.70689	-2.54989	-0.368318	FYN	FYN proto-oncogene, Src family tyrosine kinase
1559444_at	0.407014	0.00826	2.70683	-2.55002	0.295363
1554513_s_at	0.407014	0.00826	2.70667	-2.55038	0.434924	CEP89	centrosomal protein 89
225470_at	0.407014	0.00827	2.70654	-2.55065	0.453633	NUP35	nucleoporin 35
225904_at	0.407014	0.00827	2.70641	-2.55095	0.665533	CCSAP	centriole, cilia and spindle associated protein
242405_at	0.407014	0.00827	-2.70633	-2.55113	-0.823067
213092_x_at	0.40737	0.00829	2.70569	-2.55254	0.455988	DNAJC9	DnaJ heat shock protein family (Hsp40) member C9
204727_at	0.407474	0.00829	2.70527	-2.55347	0.52472	WDHD1	WD repeat and HMG-box DNA binding protein 1
208541_x_at	0.407523	0.00831	2.70473	-2.55465	0.321258	TFAM	transcription factor A, mitochondrial
211724_x_at	0.407523	0.00831	2.70457	-2.555	0.337816	MIOS	meiosis regulator for oocyte development
223818_s_at	0.408303	0.00833	2.70355	-2.55725	0.376856	RSF1	remodeling and spacing factor 1
210403_s_at	0.409231	0.00839	2.70116	-2.56252	0.580116	KCNJ1	potassium voltage-gated channel subfamily J member 1
212498_at	0.409231	0.00839	-2.70101	-2.56285	-0.376729	2021-03-06	membrane associated ring-CH-type finger 6
1555326_a_at	0.409231	0.00839	2.70096	-2.56296	0.831464	ADAM9	ADAM metallopeptidase domain 9
213344_s_at	0.409231	0.0084	2.70084	-2.56324	0.354792	H2AFX	H2A histone family member X
233070_at	0.409231	0.0084	-2.70056	-2.56386	-0.447354	ZNF197	zinc finger protein 197
203214_x_at	0.409231	0.00841	2.70025	-2.56453	0.783553	CDK1	cyclin dependent kinase 1
235825_at	0.409231	0.00841	2.70016	-2.56474	0.383627	LOC101927330	uncharacterized LOC101927330
218648_at	0.409231	0.00841	-2.70014	-2.56477	-0.484662	CRTC3	CREB regulated transcription coactivator 3
203968_s_at	0.40944	0.00843	2.69945	-2.56629	0.801364	CDC6	cell division cycle 6
203481_at	0.40944	0.00843	2.69931	-2.5666	0.512411	SLF2	SMC5-SMC6 complex localization factor 2
233931_at	0.409882	0.00845	-2.6986	-2.56817	-0.305734
214011_s_at	0.410168	0.00847	2.69771	-2.57012	0.36901	NOP16	NOP16 nucleolar protein
214847_s_at	0.410168	0.00847	-2.69749	-2.57062	-0.531722	GPSM3	G-protein signaling modulator 3
239142_at	0.410168	0.00848	2.69707	-2.57154	0.478297	RFESD	Rieske Fe-S domain containing
201530_x_at	0.410168	0.00849	2.69663	-2.57251	0.317909	LOC101928634///SENP3-EIF4A1///SNORD10///SNORA48///SNORA67///EIF4A1	uncharacterized LOC101928634///SENP3-EIF4A1 readthrough (NMD candidate)///small nucleolar RNA, C/D box 10///small nucleolar RNA, H/ACA box 48///small nucleolar RNA, H/ACA box 67///eukaryotic translation initiation factor 4A1
225736_at	0.410168	0.0085	2.69625	-2.57334	0.36959	FBXO22	F-box protein 22
235556_at	0.410168	0.00851	-2.69618	-2.5735	-0.59479	CREBRF	CREB3 regulatory factor
240964_at	0.410168	0.00851	2.6961	-2.57368	0.457566
233054_at	0.410723	0.00854	2.69457	-2.57704	0.385943	CNOT2	CCR4-NOT transcription complex subunit 2
222505_at	0.410723	0.00855	2.69431	-2.57762	0.369579	LMBR1	limb development membrane protein 1
235400_at	0.410723	0.00856	2.69381	-2.57871	0.773566	FCRLA	Fc receptor like A
210410_s_at	0.410723	0.00856	2.69367	-2.57903	0.504499	MSH5-SAPCD1///SAPCD1///MSH5	MSH5-SAPCD1 readthrough (NMD candidate)///suppressor APC domain containing 1///mutS homolog 5
1555278_a_at	0.410723	0.00857	2.69362	-2.57914	0.618331	CKAP5	cytoskeleton associated protein 5
227917_at	0.410723	0.00857	-2.69332	-2.57979	-0.451247	LOC100506990	uncharacterized LOC100506990
209832_s_at	0.410723	0.00857	2.69324	-2.57998	0.711779	CDT1	chromatin licensing and DNA replication factor 1
229236_s_at	0.410723	0.00858	2.69305	-2.58038	0.510385	SFXN4	sideroflexin 4
228207_at	0.410791	0.00859	-2.69267	-2.58121	-0.29049	LOC100499489	uncharacterized LOC100499489
223281_s_at	0.410816	0.0086	2.69233	-2.58196	0.601843	COX15	COX15, cytochrome c oxidase assembly homolog
201622_at	0.411076	0.00861	2.69179	-2.58316	0.356157	SND1	staphylococcal nuclease and tudor domain containing 1
228069_at	0.411426	0.00862	2.69116	-2.58454	0.707223	MTFR2	mitochondrial fission regulator 2
212626_x_at	0.412229	0.00865	2.68994	-2.58721	0.261355	HNRNPC	heterogeneous nuclear ribonucleoprotein C (C1/C2)
227818_at	0.412229	0.00866	2.68982	-2.58749	0.283691	CEP85	centrosomal protein 85
224866_at	0.412946	0.00868	2.68887	-2.58958	0.530941	FAR1	fatty acyl-CoA reductase 1
211804_s_at	0.413586	0.00872	2.68725	-2.59312	0.63779	CDK2	cyclin dependent kinase 2
236957_at	0.413586	0.00872	2.68721	-2.59321	0.60357	CDCA2	cell division cycle associated 2
202450_s_at	0.413586	0.00874	2.68631	-2.59519	0.894751	CTSK	cathepsin K
227165_at	0.413586	0.00874	2.68626	-2.5953	0.514327	SKA3	spindle and kinetochore associated complex subunit 3
231748_at	0.413586	0.00875	2.68597	-2.59593	0.208151	ULBP3	UL16 binding protein 3
231534_at	0.413586	0.00875	2.68578	-2.59636	0.712588	CDK1	cyclin dependent kinase 1
224877_s_at	0.413586	0.0088	2.68396	-2.60034	0.276736	MRPS5	mitochondrial ribosomal protein S5
239797_at	0.413586	0.0088	2.68378	-2.60074	0.296018
200921_s_at	0.413586	0.00881	-2.68352	-2.60131	-0.27306	BTG1	BTG anti-proliferation factor 1
205770_at	0.413586	0.00881	2.68351	-2.60133	0.474605	GSR	glutathione-disulfide reductase
230986_at	0.413586	0.00881	-2.68325	-2.60191	-1.02132	KLF8	Kruppel like factor 8
233655_s_at	0.413586	0.00881	2.6832	-2.60202	0.588545	HAUS6	HAUS augmin like complex subunit 6
222425_s_at	0.413586	0.00882	2.68314	-2.60215	0.325431	POLDIP2	DNA polymerase delta interacting protein 2
207525_s_at	0.413586	0.00882	-2.68286	-2.60276	-0.371605	GIPC1	GIPC PDZ domain containing family member 1
209434_s_at	0.413586	0.00884	2.68206	-2.60452	0.472984	PPAT	phosphoribosyl pyrophosphate amidotransferase
237453_at	0.413586	0.00885	-2.68182	-2.60504	-0.228113	ZNF529	zinc finger protein 529
236948_x_at	0.413586	0.00886	2.68114	-2.60653	0.370093	SRSF11	serine and arginine rich splicing factor 11
1554020_at	0.413586	0.00887	2.68103	-2.60677	0.806405	BICD1	BICD cargo adaptor 1
1555425_x_at	0.413586	0.00887	-2.68099	-2.60686	-0.226943	SSH2	slingshot protein phosphatase 2
222843_at	0.413586	0.00887	2.68075	-2.60739	0.45848	FIGNL1	fidgetin like 1
238256_at	0.413586	0.00887	-2.68073	-2.60744	-0.271315
201973_s_at	0.413586	0.00888	2.68055	-2.60783	0.270369	CCZ1B///CCZ1	CCZ1 homolog B, vacuolar protein trafficking and biogenesis associated///CCZ1 homolog, vacuolar protein trafficking and biogenesis associated
201266_at	0.413586	0.00888	2.68044	-2.60806	0.289797	TXNRD1	thioredoxin reductase 1
219031_s_at	0.413586	0.00888	2.68038	-2.60819	0.606818	NIP7	NIP7, nucleolar pre-rRNA processing protein
1554768_a_at	0.413586	0.00889	2.68022	-2.60854	0.684112	MAD2L1	MAD2 mitotic arrest deficient-like 1 (yeast)
207768_at	0.413586	0.00889	2.68015	-2.60869	0.498524	EGR4	early growth response 4
1558391_s_at	0.41377	0.0089	-2.67968	-2.60973	-0.264915	ZNF599	zinc finger protein 599
235923_at	0.413931	0.00891	2.67923	-2.61072	0.331346	VTI1A	vesicle transport through interaction with t-SNAREs 1A
224812_at	0.4144	0.00893	2.67841	-2.61251	0.551243	HIBADH	3-hydroxyisobutyrate dehydrogenase
219774_at	0.4144	0.00894	2.67815	-2.61308	0.29446	CCDC93	coiled-coil domain containing 93
227374_at	0.4144	0.00895	2.67762	-2.61424	0.380224	EARS2	glutamyl-tRNA synthetase 2, mitochondrial
213348_at	0.4144	0.00895	-2.67758	-2.61433	-0.516126	CDKN1C	cyclin dependent kinase inhibitor 1C
201741_x_at	0.415711	0.00899	2.67612	-2.61753	0.310808	SRSF1	serine and arginine rich splicing factor 1
228442_at	0.416036	0.009	-2.67552	-2.61882	-0.577416	NFATC2	nuclear factor of activated T-cells 2
244287_at	0.416158	0.00903	2.67444	-2.6212	0.291117	SREK1	splicing regulatory glutamic acid and lysine rich protein 1
1555673_at	0.416158	0.00905	-2.67367	-2.62288	-0.256434	KRTAP2-3///KRTAP2-4	keratin associated protein 2-3///keratin associated protein 2-4
214214_s_at	0.416158	0.00905	2.67354	-2.62316	0.453484	C1QBP	complement C1q binding protein
232488_at	0.416158	0.00906	-2.67332	-2.62364	-0.259479	PHYKPL	5-phosphohydroxy-L-lysine phospho-lyase
201872_s_at	0.416158	0.00906	2.6732	-2.62392	0.398807	ABCE1	ATP binding cassette subfamily E member 1
221994_at	0.416158	0.00906	2.67314	-2.62404	0.248002	PDLIM5	PDZ and LIM domain 5
1560339_s_at	0.416158	0.00906	2.67305	-2.62424	0.510211	NAP1L4	nucleosome assembly protein 1 like 4
202954_at	0.416158	0.00908	2.67247	-2.62551	0.664241	UBE2C	ubiquitin conjugating enzyme E2 C
1555439_at	0.416158	0.00908	2.6723	-2.62587	0.560538	GTF3C3	general transcription factor IIIC subunit 3
201069_at	0.416158	0.00909	2.67187	-2.62682	0.901489	MMP2	matrix metallopeptidase 2
225629_s_at	0.416158	0.00911	-2.67129	-2.62808	-0.388752	ZBTB4	zinc finger and BTB domain containing 4
217665_at	0.416158	0.00912	-2.67091	-2.62891	-0.525278	ZNF813	zinc finger protein 813
227265_at	0.416158	0.00913	-2.67034	-2.63016	-0.787834	FGL2	fibrinogen like 2
217076_s_at	0.416158	0.00914	-2.67008	-2.63073	-0.186472	LOC401021///HOXD4///HOXD3	uncharacterized LOC401021///homeobox D4///homeobox D3
200847_s_at	0.416158	0.00914	-2.6698	-2.63134	-0.353763	SARAF	store-operated calcium entry associated regulatory factor
200875_s_at	0.416158	0.00916	2.66932	-2.63239	0.301137	MIR1292///SNORD110///SNORD86///SNORD57///NOP56	microRNA 1292///small nucleolar RNA, C/D box 110///small nucleolar RNA, C/D box 86///small nucleolar RNA, C/D box 57///NOP56 ribonucleoprotein
229247_at	0.416158	0.00916	-2.66931	-2.6324	-0.5482	FBLN7	fibulin 7
205895_s_at	0.416158	0.00916	2.66908	-2.6329	0.525522	NOLC1	nucleolar and coiled-body phosphoprotein 1
220105_at	0.416158	0.00918	2.66849	-2.6342	0.528918	RSPH14	radial spoke head 14 homolog
203820_s_at	0.416158	0.00918	2.66827	-2.63468	1.47294	IGF2BP3	insulin like growth factor 2 mRNA binding protein 3
240256_at	0.416158	0.00919	-2.66813	-2.63498	-0.290294
215739_s_at	0.416158	0.0092	2.6677	-2.63593	0.810678	TUBGCP3	tubulin gamma complex associated protein 3
37201_at	0.416158	0.0092	-2.66757	-2.63619	-0.270724	ITIH4	inter-alpha-trypsin inhibitor heavy chain family member 4
215501_s_at	0.416158	0.0092	2.66738	-2.63661	0.618614	DUSP10	dual specificity phosphatase 10
229974_at	0.416158	0.00921	-2.66706	-2.63731	-0.911097	EVC2	EvC ciliary complex subunit 2
213652_at	0.416158	0.00923	-2.66647	-2.63859	-0.377362	PCSK5	proprotein convertase subtilisin/kexin type 5
208061_at	0.416158	0.00923	-2.66621	-2.63916	-0.218442
58308_at	0.416158	0.00924	-2.66605	-2.63952	-0.292455	TRIM62	tripartite motif containing 62
203579_s_at	0.416158	0.00924	2.66591	-2.63982	0.646009	SLC7A6	solute carrier family 7 member 6
234726_s_at	0.416158	0.00925	2.66544	-2.64086	0.564695	TMEM168	transmembrane protein 168
204873_at	0.416158	0.00926	2.66532	-2.64112	0.383712	PEX1	peroxisomal biogenesis factor 1
227597_at	0.416158	0.00926	2.66528	-2.64121	0.218311	DIS3L2	DIS3 like 3'-5' exoribonuclease 2
208086_s_at	0.416158	0.00928	2.66428	-2.64338	0.750719	DMD	dystrophin
1556097_at	0.416158	0.00928	-2.66425	-2.64345	-1.07255	HOMER2	homer scaffolding protein 2
209955_s_at	0.416158	0.00928	2.66422	-2.64352	1.13303	FAP	fibroblast activation protein alpha
203806_s_at	0.416158	0.00929	2.6641	-2.64378	0.411288	FANCA	Fanconi anemia complementation group A
220955_x_at	0.416158	0.00929	2.66387	-2.64427	0.459677	RAB23	RAB23, member RAS oncogene family
217436_x_at	0.416158	0.00929	-2.66386	-2.64429	-0.381079	HLA-J	major histocompatibility complex, class I, J (pseudogene)
226574_at	0.416498	0.00931	2.66326	-2.6456	0.402268	PSPC1	paraspeckle component 1
235356_at	0.417202	0.00933	2.66234	-2.6476	0.469443	NHLRC2	NHL repeat containing 2
220651_s_at	0.41773	0.00936	2.66139	-2.64968	0.914709	MCM10	minichromosome maintenance 10 replication initiation factor
224119_at	0.41773	0.00936	-2.66126	-2.64996	-0.217913	ZBTB46-AS1	ZBTB46 antisense RNA 1
208368_s_at	0.41773	0.00937	2.66094	-2.65066	0.53249	BRCA2	BRCA2, DNA repair associated
236562_at	0.41773	0.00937	-2.66068	-2.65121	-0.517931	ZNF439	zinc finger protein 439
1556382_a_at	0.417742	0.00938	-2.66037	-2.65191	-0.23337	NAA15	N(alpha)-acetyltransferase 15, NatA auxiliary subunit
1552370_at	0.417742	0.00939	2.66002	-2.65265	0.568495	C4orf33	chromosome 4 open reading frame 33
204821_at	0.417742	0.0094	-2.65978	-2.65318	-0.511614	BTN3A3	butyrophilin subfamily 3 member A3
204000_at	0.418139	0.00942	-2.65886	-2.65518	-0.367864	GNB5	G protein subunit beta 5
217551_at	0.418139	0.00943	2.65851	-2.65595	0.728995	OR7E14P	olfactory receptor family 7 subfamily E member 14 pseudogene
1554872_a_at	0.418139	0.00943	-2.65838	-2.65623	-0.334858	HMGCLL1	3-hydroxymethyl-3-methylglutaryl-CoA lyase like 1
220840_s_at	0.418139	0.00945	2.65779	-2.65751	0.622578	C1orf112	chromosome 1 open reading frame 112
206325_at	0.418139	0.00945	-2.65772	-2.65767	-0.259606	SERPINA6	serpin family A member 6
218722_s_at	0.418139	0.00945	2.65765	-2.65782	0.331523	CCDC51	coiled-coil domain containing 51
240712_s_at	0.419053	0.00948	2.65651	-2.66029	0.264802
236356_at	0.419053	0.00949	2.65625	-2.66085	0.555044	NDUFS1	NADH:ubiquinone oxidoreductase core subunit S1
210562_at	0.419304	0.00951	2.65544	-2.66261	0.212998	GREB1	growth regulation by estrogen in breast cancer 1
217791_s_at	0.419304	0.00951	2.65544	-2.66262	0.473324	ALDH18A1	aldehyde dehydrogenase 18 family member A1
1558522_at	0.419368	0.00953	2.65469	-2.66426	0.683792	MPP6	membrane palmitoylated protein 6
225814_at	0.419368	0.00955	-2.65397	-2.66582	-0.391335	XRN1	5'-3' exoribonuclease 1
223008_s_at	0.419368	0.00955	-2.65395	-2.66586	-0.32207	TMEM245	transmembrane protein 245
40569_at	0.419368	0.00958	-2.6526	-2.66879	-0.346499	MZF1	myeloid zinc finger 1
218542_at	0.419368	0.00959	2.65226	-2.66953	0.807085	CEP55	centrosomal protein 55
206500_s_at	0.419368	0.00959	2.65223	-2.66959	0.648588	MIS18BP1	MIS18 binding protein 1
204365_s_at	0.419368	0.0096	-2.65207	-2.66995	-0.442666	REEP1	receptor accessory protein 1
202998_s_at	0.419368	0.00961	2.65167	-2.67082	0.970971	LOXL2	lysyl oxidase like 2
224878_at	0.419368	0.00961	2.65153	-2.67112	0.395909	UBFD1	ubiquitin family domain containing 1
219352_at	0.419368	0.00962	-2.65133	-2.67155	-0.454599	HERC6	HECT and RLD domain containing E3 ubiquitin protein ligase family member 6
208097_s_at	0.419368	0.00962	2.65118	-2.67187	0.656364	TMX1	thioredoxin related transmembrane protein 1
221428_s_at	0.419368	0.00963	2.65082	-2.67265	0.738191	TBL1XR1	transducin (beta)-like 1 X-linked receptor 1
1556344_at	0.419368	0.00964	2.6504	-2.67357	0.479743	LOC150051	uncharacterized LOC150051
209693_at	0.419368	0.00965	2.65019	-2.67402	0.599433	ASTN2	astrotactin 2
64064_at	0.419368	0.00965	-2.64998	-2.67448	-0.698112	GIMAP1-GIMAP5///GIMAP5	GIMAP1-GIMAP5 readthrough///GTPase, IMAP family member 5
232238_at	0.419368	0.00966	2.64982	-2.67483	0.477388	ASPM	abnormal spindle microtubule assembly
209635_at	0.419368	0.00967	2.64937	-2.67581	0.3456	AP1S1	adaptor related protein complex 1 sigma 1 subunit
244414_at	0.419368	0.00967	-2.64929	-2.67599	-1.08514
223356_s_at	0.419368	0.00968	-2.64883	-2.67697	-0.282125	MTIF3	mitochondrial translational initiation factor 3
222055_at	0.419368	0.00968	2.6488	-2.67704	0.198838	FAHD2CP///FAHD2B///FAHD2A	fumarylacetoacetate hydrolase domain containing 2C, pseudogene///fumarylacetoacetate hydrolase domain containing 2B///fumarylacetoacetate hydrolase domain containing 2A
200060_s_at	0.419368	0.00969	2.64867	-2.67733	0.27678	RNPS1	RNA binding protein with serine rich domain 1
1556065_at	0.419368	0.00969	2.64848	-2.67773	0.166191	CDPF1	cysteine rich DPF motif domain containing 1
233031_at	0.419368	0.00969	2.64845	-2.6778	0.425879	ZEB2	zinc finger E-box binding homeobox 2
224719_s_at	0.419368	0.0097	-2.64812	-2.67852	-0.55476	C12orf57	chromosome 12 open reading frame 57
222062_at	0.419368	0.00971	-2.64782	-2.67918	-0.619974	IL27RA	interleukin 27 receptor subunit alpha
222931_s_at	0.419368	0.00971	2.64777	-2.67929	0.796485	THNSL1	threonine synthase like 1
211470_s_at	0.419438	0.00972	2.64741	-2.68005	0.914499	SULT1C2	sulfotransferase family 1C member 2
217398_x_at	0.419657	0.00973	2.64693	-2.68109	0.289874	GAPDH	glyceraldehyde-3-phosphate dehydrogenase
203682_s_at	0.419755	0.00974	2.64655	-2.68191	0.396307	IVD	isovaleryl-CoA dehydrogenase
227981_at	0.419755	0.00976	-2.64605	-2.68301	-0.24941	CYB561D1	cytochrome b561 family member D1
215874_at	0.419755	0.00976	-2.64598	-2.68316	-0.422627
222011_s_at	0.421637	0.00981	2.64404	-2.68736	0.544503	SNORA29///TCP1	small nucleolar RNA, H/ACA box 29///t-complex 1
201727_s_at	0.421994	0.00983	2.64344	-2.68866	0.410346	ELAVL1	ELAV like RNA binding protein 1
204886_at	0.422055	0.00984	2.64296	-2.6897	0.557975	PLK4	polo like kinase 4
209642_at	0.422055	0.00985	2.64253	-2.69063	0.787724	BUB1	BUB1 mitotic checkpoint serine/threonine kinase
223510_at	0.422055	0.00985	2.64252	-2.69066	0.319258	NRP2	neuropilin 2
204261_s_at	0.422055	0.00987	2.64177	-2.69228	0.395365	PSEN2	presenilin 2
211519_s_at	0.422055	0.00989	2.64092	-2.69413	0.690742	KIF2C	kinesin family member 2C
201457_x_at	0.422055	0.00989	2.64086	-2.69426	0.296955	BUB3	BUB3, mitotic checkpoint protein
235178_x_at	0.422055	0.0099	2.6407	-2.69459	0.367889	ESCO2	establishment of sister chromatid cohesion N-acetyltransferase 2
205588_s_at	0.422055	0.00991	2.64034	-2.69538	0.554409	FGFR1OP	FGFR1 oncogene partner
238811_at	0.422055	0.00992	2.63981	-2.69653	0.479553	ATP11B	ATPase phospholipid transporting 11B (putative)
216843_x_at	0.422055	0.00993	2.63946	-2.69727	0.382662	PMS2P1	PMS1 homolog 2, mismatch repair system component pseudogene 1
215412_x_at	0.422055	0.00993	2.63936	-2.69749	0.376956	PMS2P8	PMS1 homolog 2, mismatch repair system component pseudogene 8
213584_s_at	0.422055	0.00994	2.63916	-2.69792	0.427392	CREBZF	CREB/ATF bZIP transcription factor
235233_s_at	0.422055	0.00994	-2.63911	-2.69804	-0.364675	GMEB1	glucocorticoid modulatory element binding protein 1
212204_at	0.422055	0.00996	-2.63833	-2.69972	-0.304772	TMEM87A	transmembrane protein 87A
65493_at	0.422055	0.00997	2.63802	-2.70039	0.383448	HEATR6	HEAT repeat containing 6
202593_s_at	0.422055	0.00999	2.6374	-2.70174	0.472227	GDE1	glycerophosphodiester phosphodiesterase 1
208931_s_at	0.422055	0.00999	2.63735	-2.70183	0.550326	ILF3	interleukin enhancer binding factor 3
209805_at	0.422055	0.00999	2.63726	-2.70204	0.3118	PMS2CL///PMS2	PMS2 C-terminal like pseudogene///PMS1 homolog 2, mismatch repair system component
218988_at	0.422055	0.01	2.6371	-2.70238	0.603681	SLC35E3	solute carrier family 35 member E3
208310_s_at	0.422055	0.01	2.63696	-2.70268	0.364563	CCZ1B///CCZ1	CCZ1 homolog B, vacuolar protein trafficking and biogenesis associated///CCZ1 homolog, vacuolar protein trafficking and biogenesis associated
211933_s_at	0.422055	0.01	2.63667	-2.7033	0.431248	HNRNPA3///HNRNPA3P1	heterogeneous nuclear ribonucleoprotein A3///heterogeneous nuclear ribonucleoprotein A3 pseudogene 1
213504_at	0.422055	0.01	2.63657	-2.70352	0.37866	COPS6	COP9 signalosome subunit 6
1557394_at	0.422055	0.01	-2.63645	-2.70379	-0.309943	DLGAP4	DLG associated protein 4
209875_s_at	0.422055	0.01	2.63622	-2.70429	1.61723	SPP1	secreted phosphoprotein 1
244408_at	0.422055	0.01	-2.63614	-2.70445	-0.356828
201326_at	0.422055	0.01	2.63594	-2.70488	0.412758	CCT6A	chaperonin containing TCP1 subunit 6A
1552660_a_at	0.42211	0.01	2.63561	-2.7056	0.71341	C5orf22	chromosome 5 open reading frame 22
207460_at	0.422328	0.01	-2.63514	-2.70662	-0.732608	GZMM	granzyme M
212733_at	0.422772	0.0101	-2.63447	-2.70807	-0.409385	RUBCN	RUN and cysteine rich domain containing beclin 1 interacting protein
229812_at	0.42295	0.0101	2.63379	-2.70954	0.513713	USP48	ubiquitin specific peptidase 48
211645_x_at	0.42295	0.0101	-2.63369	-2.70975	-1.54558
225711_at	0.42295	0.0101	2.63335	-2.71049	0.576492	ARL6IP6	ADP ribosylation factor like GTPase 6 interacting protein 6
203612_at	0.42295	0.0101	2.63318	-2.71085	0.419315	BYSL	bystin like
218698_at	0.422996	0.0101	2.63269	-2.71191	0.445017	APIP	APAF1 interacting protein
214962_s_at	0.422996	0.0101	2.63248	-2.71236	0.588128	NUP160	nucleoporin 160
225276_at	0.422996	0.0101	-2.63227	-2.71281	-0.357801	GSPT1	G1 to S phase transition 1
229614_at	0.422996	0.0101	-2.63201	-2.71337	-0.606528	ZNF320	zinc finger protein 320
215023_s_at	0.423539	0.0102	2.63093	-2.71571	0.405649	PEX1	peroxisomal biogenesis factor 1
214506_at	0.423539	0.0102	-2.63087	-2.71584	-0.340643	GPR182	G protein-coupled receptor 182
1553835_a_at	0.423539	0.0102	2.63069	-2.71621	0.299164	COL6A5	collagen type VI alpha 5 chain
222946_s_at	0.423737	0.0102	2.63017	-2.71735	0.355505	AUNIP	aurora kinase A and ninein interacting protein
221469_at	0.423737	0.0102	-2.62992	-2.71788	-0.193522	GPR32	G protein-coupled receptor 32
212318_at	0.423737	0.0102	2.62932	-2.71918	0.426755	TNPO3	transportin 3
211662_s_at	0.423737	0.0102	2.62919	-2.71946	0.241124	VDAC2	voltage dependent anion channel 2
217922_at	0.423737	0.0102	-2.62856	-2.72082	-0.326184	MAN1A2	mannosidase alpha class 1A member 2
229886_at	0.423737	0.0102	2.62832	-2.72133	0.40574	C5orf34	chromosome 5 open reading frame 34
219670_at	0.423737	0.0102	-2.62822	-2.72155	-0.598406	BEND5	BEN domain containing 5
1559425_at	0.423737	0.0102	-2.62815	-2.7217	-0.817174
210349_at	0.423737	0.0103	2.62776	-2.72255	0.403153	CAMK4	calcium/calmodulin dependent protein kinase IV
201196_s_at	0.423737	0.0103	2.62772	-2.72263	0.42258	AMD1	adenosylmethionine decarboxylase 1
230345_at	0.424126	0.0103	-2.6269	-2.7244	-0.594095	SEMA7A	semaphorin 7A (John Milton Hagen blood group)
210031_at	0.424126	0.0103	-2.62682	-2.72456	-0.599139	CD247	CD247 molecule
236770_at	0.424251	0.0103	-2.62644	-2.72539	-0.274152	TPTE2P5	transmembrane phosphoinositide 3-phosphatase and tensin homolog 2 pseudogene 5
204666_s_at	0.424273	0.0103	2.62614	-2.72604	0.50226	SIKE1	suppressor of IKBKE 1
222442_s_at	0.424273	0.0103	2.62543	-2.72757	0.500007	ARL8B	ADP ribosylation factor like GTPase 8B
231918_s_at	0.424273	0.0103	2.62499	-2.72851	0.56697	GFM2	G elongation factor mitochondrial 2
223456_s_at	0.424273	0.0103	2.62491	-2.72867	0.34038	TCHP	trichoplein keratin filament binding
202890_at	0.424273	0.0103	-2.62486	-2.7288	-0.882538	MAP7	microtubule associated protein 7
201091_s_at	0.424273	0.0103	2.62469	-2.72916	0.404505	CBX3	chromobox 3
207810_at	0.424273	0.0103	-2.62429	-2.73002	-0.217226	F13B	coagulation factor XIII B chain
242976_at	0.424273	0.0104	2.62419	-2.73022	0.1906
232986_at	0.424582	0.0104	-2.62365	-2.7314	-0.27438	ZNF233	zinc finger protein 233
224149_x_at	0.424589	0.0104	2.62336	-2.73201	0.634251	SLMAP	sarcolemma associated protein
209602_s_at	0.426018	0.0104	-2.62184	-2.73528	-0.722618	GATA3	GATA binding protein 3
213926_s_at	0.426093	0.0104	2.6215	-2.73601	0.596461	AGFG1	ArfGAP with FG repeats 1
207128_s_at	0.426419	0.0104	-2.62093	-2.73725	-0.480517	ZNF223	zinc finger protein 223
224869_s_at	0.426419	0.0105	2.62067	-2.73781	0.407328	MRPS25	mitochondrial ribosomal protein S25
212178_s_at	0.426769	0.0105	2.62009	-2.73906	0.571949	POM121C	POM121 transmembrane nucleoporin C
215898_at	0.426942	0.0105	-2.61966	-2.73997	-0.366541	TTLL5	tubulin tyrosine ligase like 5
208702_x_at	0.426964	0.0105	2.61937	-2.74061	0.577707	APLP2	amyloid beta precursor like protein 2
229152_at	0.428316	0.0105	-2.61763	-2.74434	-0.792913	FDCSP	follicular dendritic cell secreted protein
211360_s_at	0.428316	0.0105	2.61761	-2.74439	0.250679	ITPR2	inositol 1,4,5-trisphosphate receptor type 2
1552343_s_at	0.428316	0.0105	-2.61737	-2.7449	-0.611397	PDE7A	phosphodiesterase 7A
207791_s_at	0.42856	0.0106	2.61688	-2.74594	0.40648	RAB1A	RAB1A, member RAS oncogene family
221078_s_at	0.428856	0.0106	2.61621	-2.7474	0.750139	CCDC88A	coiled-coil domain containing 88A
242874_at	0.428856	0.0106	-2.61608	-2.74767	-0.506335
214960_at	0.429208	0.0106	2.6155	-2.74891	0.529225	API5	apoptosis inhibitor 5
211968_s_at	0.429328	0.0106	2.61509	-2.7498	0.453435	HSP90AA1	heat shock protein 90 alpha family class A member 1
225434_at	0.429328	0.0106	-2.61485	-2.75032	-0.349936	DEDD2	death effector domain containing 2
221673_s_at	0.429705	0.0106	2.61414	-2.75183	0.348932	CSNK1G1	casein kinase 1 gamma 1
209900_s_at	0.429705	0.0106	2.61386	-2.75244	0.6082	SLC16A1	solute carrier family 16 member 1
207634_at	0.429705	0.0107	-2.61358	-2.75304	-0.362809	PDCD1	programmed cell death 1
243839_s_at	0.429705	0.0107	-2.61343	-2.75336	-0.220367
213730_x_at	0.430528	0.0107	2.61244	-2.75547	0.395136	TCF3	transcription factor 3
210008_s_at	0.430905	0.0107	2.61163	-2.75722	0.302175	MRPS12	mitochondrial ribosomal protein S12
202736_s_at	0.430905	0.0107	2.61152	-2.75744	0.424527	LSM4	LSM4 homolog, U6 small nuclear RNA and mRNA degradation associated
237034_at	0.430905	0.0107	-2.61111	-2.75833	-0.437011
227940_at	0.430905	0.0107	2.61103	-2.75851	0.67302	LOC339803	uncharacterized LOC339803
1570601_at	0.431032	0.0107	-2.61065	-2.75933	-0.19237
204510_at	0.431129	0.0108	2.61005	-2.7606	0.505156	CDC7	cell division cycle 7
217785_s_at	0.431129	0.0108	2.60994	-2.76084	0.707645	YKT6	YKT6 v-SNARE homolog (S. cerevisiae)
228584_at	0.431129	0.0108	2.60957	-2.76163	0.595553	SGCB	sarcoglycan beta
220223_at	0.431129	0.0108	2.60947	-2.76184	0.285036	ATAD5	ATPase family, AAA domain containing 5
230753_at	0.431555	0.0108	-2.60884	-2.76321	-0.505501	PATL2	PAT1 homolog 2
208381_s_at	0.431597	0.0108	2.60853	-2.76387	0.438413	SGPL1	sphingosine-1-phosphate lyase 1
229094_at	0.431599	0.0108	-2.60826	-2.76445	-0.339886	ATP6V0E2-AS1	ATP6V0E2 antisense RNA 1
208691_at	0.431871	0.0108	2.60775	-2.76553	0.681981	TFRC	transferrin receptor
243488_at	0.431935	0.0108	2.60733	-2.76644	0.381867
217969_at	0.431935	0.0108	-2.60715	-2.76681	-0.423504	VPS51	VPS51, GARP complex subunit
201072_s_at	0.432022	0.0108	2.60681	-2.76755	0.500565	SMARCC1	SWI/SNF related, matrix associated, actin dependent regulator of chromatin subfamily c member 1
238504_at	0.432523	0.0109	2.60611	-2.76905	0.527623	SDHAF4	succinate dehydrogenase complex assembly factor 4
1553682_at	0.433588	0.0109	-2.60492	-2.77159	-0.28728	FBXL14	F-box and leucine rich repeat protein 14
224596_at	0.433588	0.0109	2.60465	-2.77216	0.521376	SLC44A1	solute carrier family 44 member 1
203040_s_at	0.433647	0.0109	2.60433	-2.77286	0.319736	HMBS	hydroxymethylbilane synthase
219886_at	0.433647	0.0109	2.60391	-2.77374	0.325796	CEP97	centrosomal protein 97
217354_s_at	0.433647	0.0109	2.60359	-2.77444	0.351393	HPS1	HPS1, biogenesis of lysosomal organelles complex 3 subunit 1
200757_s_at	0.433647	0.011	2.60333	-2.77499	0.344539	CALU	calumenin
223373_s_at	0.433647	0.011	2.60326	-2.77515	0.282628	PLA2G12A	phospholipase A2 group XIIA
202815_s_at	0.434022	0.011	-2.60266	-2.77642	-0.358692	HEXIM1	hexamethylene bisacetamide inducible 1
201291_s_at	0.435208	0.011	2.60138	-2.77916	1.0197	TOP2A	topoisomerase (DNA) II alpha
228482_at	0.435355	0.011	-2.60099	-2.78	-0.479425	TVP23C-CDRT4///CDRT4///TVP23C	TVP23C-CDRT4 readthrough///CMT1A duplicated region transcript 4///trans-golgi network vesicle protein 23 homolog C (S. cerevisiae)
205987_at	0.435592	0.011	-2.60026	-2.78155	-1.47308	CD1C	CD1c molecule
211341_at	0.435592	0.011	2.60025	-2.78158	0.550393	POU4F1	POU class 4 homeobox 1
213247_at	0.436454	0.0111	-2.59924	-2.78373	-0.660397	SVEP1	sushi, von Willebrand factor type A, EGF and pentraxin domain containing 1
208930_s_at	0.436768	0.0111	2.59871	-2.78487	0.635954	ILF3	interleukin enhancer binding factor 3
214114_x_at	0.437005	0.0111	2.59824	-2.78587	0.212784	FASTK	Fas activated serine/threonine kinase
226426_at	0.438241	0.0111	-2.59677	-2.78901	-0.431349	ADNP	activity dependent neuroprotector homeobox
206499_s_at	0.438241	0.0111	2.59665	-2.78926	0.498185	RCC1	regulator of chromosome condensation 1
1552389_at	0.439922	0.0112	-2.59496	-2.79288	-0.247185	ERICH5	glutamate rich 5
215147_at	0.440215	0.0112	-2.59437	-2.79413	-0.584552
203744_at	0.440215	0.0112	2.59398	-2.79496	0.623647	HMGB3	high mobility group box 3
200777_s_at	0.440215	0.0112	2.59365	-2.79566	0.3016	BZW1	basic leucine zipper and W2 domains 1
227967_at	0.440215	0.0112	2.59364	-2.79568	0.379307	TUBGCP5	tubulin gamma complex associated protein 5
205342_s_at	0.440739	0.0113	2.59293	-2.7972	0.891199	SULT1C2	sulfotransferase family 1C member 2
200731_s_at	0.440832	0.0113	2.5922	-2.79876	0.393153	PTP4A1	protein tyrosine phosphatase type IVA, member 1
213107_at	0.440832	0.0113	-2.59214	-2.79889	-0.562855	TNIK	TRAF2 and NCK interacting kinase
1554614_a_at	0.440832	0.0113	2.59102	-2.80127	0.484667	PTBP2	polypyrimidine tract binding protein 2
219238_at	0.440832	0.0113	2.59077	-2.80179	0.392971	PIGV	phosphatidylinositol glycan anchor biosynthesis class V
213406_at	0.440832	0.0113	2.5906	-2.80216	0.386189	WSB1	WD repeat and SOCS box containing 1
243291_at	0.440832	0.0113	-2.5904	-2.80258	-0.476077
232867_at	0.440832	0.0113	-2.59002	-2.8034	-0.374268
240527_at	0.440832	0.0114	-2.58993	-2.80359	-0.324587
201529_s_at	0.440832	0.0114	2.58985	-2.80375	0.475898	RPA1	replication protein A1
201118_at	0.440832	0.0114	2.58957	-2.80436	0.5255	PGD	phosphogluconate dehydrogenase
218195_at	0.440832	0.0114	2.58934	-2.80484	0.487758	ARMT1	acidic residue methyltransferase 1
210889_s_at	0.440832	0.0114	2.58887	-2.80584	1.59672	FCGR2B	Fc fragment of IgG receptor IIb
208910_s_at	0.440832	0.0114	2.58883	-2.80594	0.48463	C1QBP	complement C1q binding protein
200877_at	0.440832	0.0114	2.58864	-2.80633	0.32423	CCT4	chaperonin containing TCP1 subunit 4
225106_s_at	0.440832	0.0114	2.5883	-2.80706	0.555202	OGFOD1	2-oxoglutarate and iron dependent oxygenase domain containing 1
1569022_a_at	0.440832	0.0114	2.58829	-2.80707	0.58554	PIK3C2A	phosphatidylinositol-4-phosphate 3-kinase catalytic subunit type 2 alpha
220467_at	0.440832	0.0114	-2.58828	-2.80711	-0.706596
214068_at	0.440832	0.0114	2.58778	-2.80816	0.266804	BEAN1	brain expressed, associated with NEDD4, 1
206902_s_at	0.440832	0.0114	2.58746	-2.80885	0.400438	EXOG	endo/exonuclease (5'-3'), endonuclease G-like
222819_at	0.440832	0.0114	2.58721	-2.80938	0.777456	CTPS2	CTP synthase 2
AFFX-HUMGAPDH/M33197_5_at	0.440832	0.0114	2.58716	-2.8095	0.342837	GAPDH	glyceraldehyde-3-phosphate dehydrogenase
224002_s_at	0.440832	0.0114	2.58679	-2.81026	0.498721	FKBP7	FK506 binding protein 7
205446_s_at	0.440832	0.0115	2.5861	-2.81173	0.704852	ATF2	activating transcription factor 2
216956_s_at	0.440832	0.0115	-2.58606	-2.81182	-0.27379	ITGA2B	integrin subunit alpha 2b
212736_at	0.440832	0.0115	-2.58604	-2.81188	-0.357893	C16orf45	chromosome 16 open reading frame 45
226898_s_at	0.440832	0.0115	2.58556	-2.81289	0.429908	SFPQ	splicing factor proline and glutamine rich
1555185_x_at	0.440832	0.0115	2.58551	-2.81299	0.289263	TERF2	telomeric repeat binding factor 2
225088_at	0.440832	0.0115	2.58519	-2.81367	0.539646	FOPNL	FGFR1OP N-terminal like
216349_at	0.440832	0.0115	2.58516	-2.81373	0.200188	DGKH	diacylglycerol kinase eta
208080_at	0.440832	0.0115	2.58485	-2.81439	0.29026	AURKA	aurora kinase A
230867_at	0.440832	0.0115	2.58466	-2.8148	0.874402	COL6A6	collagen type VI alpha 6 chain
1561486_at	0.44087	0.0115	-2.58412	-2.81596	-0.33555	ROCK1	Rho associated coiled-coil containing protein kinase 1
223631_s_at	0.44087	0.0115	-2.58391	-2.81639	-0.285223	C19orf33	chromosome 19 open reading frame 33
234049_at	0.44087	0.0116	2.58343	-2.81741	0.244576	FAM86B3P	family with sequence similarity 86, member A pseudogene
227747_at	0.44087	0.0116	-2.58331	-2.81766	-0.487196	MPZL3	myelin protein zero like 3
222704_at	0.44087	0.0116	2.58326	-2.81777	0.356564	POLR1A	RNA polymerase I subunit A
244675_at	0.44087	0.0116	2.58306	-2.81819	0.362455	RGS8	regulator of G-protein signaling 8
216525_x_at	0.441564	0.0116	2.58201	-2.82044	0.358779	PMS2P3	PMS1 homolog 2, mismatch repair system component pseudogene 3
207515_s_at	0.441564	0.0116	2.58196	-2.82055	0.302734	POLR1C	RNA polymerase I subunit C
210116_at	0.442436	0.0116	-2.58096	-2.82267	-0.760771	SH2D1A	SH2 domain containing 1A
213149_at	0.442476	0.0116	2.58062	-2.82338	0.484449	DLAT	dihydrolipoamide S-acetyltransferase
208952_s_at	0.442476	0.0116	2.5804	-2.82385	0.349901	LARP4B	La ribonucleoprotein domain family member 4B
239265_at	0.442511	0.0117	2.57994	-2.82483	0.33003	SLC35G1	solute carrier family 35 member G1
213151_s_at	0.442511	0.0117	2.57934	-2.8261	0.238699	2021-09-07	septin 7
1569013_s_at	0.442511	0.0117	2.57919	-2.82641	0.495715	LOC101929959///BMS1P20	ribosome biogenesis protein BMS1 homolog///BMS1, ribosome biogenesis factor pseudogene 20
1555491_a_at	0.442511	0.0117	-2.57917	-2.82646	-0.404346	C19orf66	chromosome 19 open reading frame 66
215224_at	0.442511	0.0117	2.57908	-2.82666	0.515322	SNORA21	small nucleolar RNA, H/ACA box 21
205519_at	0.442861	0.0117	2.57852	-2.82784	0.632361	WDR76	WD repeat domain 76
213983_s_at	0.4431	0.0117	2.57806	-2.82882	0.481622	PDS5A	PDS5 cohesin associated factor A
1569053_at	0.443177	0.0117	-2.57774	-2.8295	-0.240836	AP3M2	adaptor related protein complex 3 mu 2 subunit
203571_s_at	0.443183	0.0117	-2.57747	-2.83006	-0.773157	ADIRF	adipogenesis regulatory factor
209258_s_at	0.444154	0.0118	2.57609	-2.833	0.83118	SMC3	structural maintenance of chromosomes 3
224595_at	0.444154	0.0118	2.57597	-2.83324	0.775981	SLC44A1	solute carrier family 44 member 1
241836_x_at	0.444154	0.0118	2.5757	-2.83383	0.310385	CEP97	centrosomal protein 97
210405_x_at	0.444154	0.0118	2.57548	-2.83428	0.422819	TNFRSF10B	TNF receptor superfamily member 10b
242010_at	0.444154	0.0118	-2.57537	-2.83453	-0.280119
239122_at	0.444311	0.0118	-2.57489	-2.83554	-0.573289
219002_at	0.444311	0.0118	2.57472	-2.8359	0.377372	FASTKD1	FAST kinase domains 1
209321_s_at	0.44509	0.0119	2.57368	-2.83811	0.531085	ADCY3	adenylate cyclase 3
236598_at	0.44509	0.0119	2.57355	-2.83838	0.606816	LOC100996579	uncharacterized LOC100996579
224470_at	0.445207	0.0119	2.57319	-2.83914	0.377521	SEC22C	SEC22 homolog C, vesicle trafficking protein
209679_s_at	0.446385	0.0119	-2.57195	-2.84178	-0.714639	SMAGP	small cell adhesion glycoprotein
203106_s_at	0.446691	0.0119	2.57119	-2.84338	0.491688	VPS41	VPS41, HOPS complex subunit
201514_s_at	0.446691	0.0119	2.57106	-2.84366	0.597318	G3BP1	G3BP stress granule assembly factor 1
244584_at	0.446691	0.012	2.57052	-2.8448	0.373974	KIAA1549L	KIAA1549 like
221265_s_at	0.446691	0.012	2.57043	-2.84499	0.314613	VWA9	von Willebrand factor A domain containing 9
201873_s_at	0.446691	0.012	2.57004	-2.8458	0.324795	ABCE1	ATP binding cassette subfamily E member 1
201714_at	0.446691	0.012	2.57003	-2.84583	0.544244	TUBG1	tubulin gamma 1
211799_x_at	0.446691	0.012	-2.56976	-2.8464	-0.351264	HLA-C	major histocompatibility complex, class I, C
203079_s_at	0.446691	0.012	2.56932	-2.84733	0.356335	CUL2	cullin 2
214086_s_at	0.446691	0.012	2.56868	-2.84869	0.367688	PARP2	poly(ADP-ribose) polymerase 2
203207_s_at	0.446691	0.012	2.56842	-2.84924	0.481914	MTFR1	mitochondrial fission regulator 1
224078_at	0.446691	0.012	2.56811	-2.8499	0.344826	MFSD14C	major facilitator superfamily domain containing 14C
240236_at	0.446691	0.012	2.56796	-2.85021	0.150318	STXBP5L	syntaxin binding protein 5 like
1569074_at	0.446691	0.012	-2.56791	-2.85031	-0.267671	SRRM3	serine/arginine repetitive matrix 3
38703_at	0.446691	0.012	2.56771	-2.85073	0.266691	DNPEP	aspartyl aminopeptidase
226333_at	0.446691	0.0121	-2.5676	-2.85096	-0.632783	IL6R	interleukin 6 receptor
228737_at	0.446691	0.0121	-2.5676	-2.85097	-0.822111	TOX2	TOX high mobility group box family member 2
210005_at	0.446776	0.0121	2.56709	-2.85205	0.404722	GART	phosphoribosylglycinamide formyltransferase, phosphoribosylglycinamide synthetase, phosphoribosylaminoimidazole synthetase
201490_s_at	0.446776	0.0121	2.56702	-2.8522	0.545069	PPIF	peptidylprolyl isomerase F
205369_x_at	0.446993	0.0121	2.5663	-2.85372	0.589868	DBT	dihydrolipoamide branched chain transacylase E2
227085_at	0.446993	0.0121	2.56614	-2.85407	0.41153	H2AFV	H2A histone family member V
1555514_a_at	0.446993	0.0121	2.56602	-2.8543	0.492144	PIAS2	protein inhibitor of activated STAT 2
218868_at	0.446993	0.0121	2.56582	-2.85473	0.371814	ACTR3B	ARP3 actin related protein 3 homolog B
225039_at	0.44729	0.0121	2.56532	-2.85579	0.466948	RPE	ribulose-5-phosphate-3-epimerase
214748_at	0.44905	0.0122	-2.56359	-2.85944	-0.411504	N4BP2L2	NEDD4 binding protein 2 like 2
225123_at	0.449261	0.0122	-2.56279	-2.86113	-0.522553	SESN3	sestrin 3
226474_at	0.449261	0.0122	-2.56277	-2.86118	-0.67598	NLRC5	NLR family CARD domain containing 5
235498_at	0.449261	0.0122	2.56266	-2.86142	0.708786	LRRIQ3	leucine rich repeats and IQ motif containing 3
235862_at	0.449935	0.0122	-2.56184	-2.86314	-0.293966
203829_at	0.45281	0.0123	2.55919	-2.86872	0.36512	ELP4	elongator acetyltransferase complex subunit 4
200693_at	0.452973	0.0123	2.55868	-2.86981	0.3042	YWHAQ	tyrosine 3-monooxygenase/tryptophan 5-monooxygenase activation protein theta
230522_s_at	0.452973	0.0124	2.55833	-2.87054	0.403342	ARHGEF39	Rho guanine nucleotide exchange factor 39
213235_at	0.452973	0.0124	2.5581	-2.87104	0.249948	KNOP1	lysine rich nucleolar protein 1
206052_s_at	0.452973	0.0124	2.55805	-2.87113	0.320429	SLBP	stem-loop binding protein
205188_s_at	0.453005	0.0124	2.55777	-2.87172	0.522998	SMAD5	SMAD family member 5
208042_at	0.454381	0.0124	2.55594	-2.87558	0.382961	AGGF1	angiogenic factor with G-patch and FHA domains 1
208680_at	0.454381	0.0124	2.55558	-2.87633	0.342082	PRDX1	peroxiredoxin 1
211150_s_at	0.454381	0.0125	2.555	-2.87756	0.49514	DLAT	dihydrolipoamide S-acetyltransferase
202533_s_at	0.454381	0.0125	2.55433	-2.87896	0.752824	DHFR	dihydrofolate reductase
227908_at	0.454381	0.0125	2.55425	-2.87915	0.386951	TBC1D24	TBC1 domain family member 24
1554325_at	0.454381	0.0125	2.55421	-2.87921	0.230893	DOCK2	dedicator of cytokinesis 2
225173_at	0.454381	0.0125	2.55421	-2.87922	0.823776	ARHGAP18	Rho GTPase activating protein 18
226385_s_at	0.454381	0.0125	2.55418	-2.87927	0.329996	MALSU1	mitochondrial assembly of ribosomal large subunit 1
213971_s_at	0.454381	0.0125	2.55402	-2.87962	0.505753	SUZ12P1///SUZ12	SUZ12 polycomb repressive complex 2 subunit pseudogene 1///SUZ12 polycomb repressive complex 2 subunit
241241_at	0.454381	0.0125	2.55397	-2.87972	0.238229	RPS14	ribosomal protein S14
218828_at	0.454381	0.0125	-2.55374	-2.8802	-0.300184	TMEM256-PLSCR3///PLSCR3	TMEM256-PLSCR3 readthrough (NMD candidate)///phospholipid scramblase 3
1554089_s_at	0.454381	0.0125	2.55362	-2.88047	0.480213	SBDSP1///SBDS	Shwachman-Bodian-Diamond syndrome pseudogene 1///SBDS ribosome assembly guanine nucleotide exchange factor
219861_at	0.45523	0.0125	2.55253	-2.88274	0.394892	DNAJC17	DnaJ heat shock protein family (Hsp40) member C17
200841_s_at	0.45523	0.0126	2.55224	-2.88337	0.677269	EPRS	glutamyl-prolyl-tRNA synthetase
218057_x_at	0.45523	0.0126	2.55216	-2.88353	0.277318	EMC8	ER membrane protein complex subunit 8
227811_at	0.455373	0.0126	-2.5518	-2.8843	-0.357236	FGD3	FYVE, RhoGEF and PH domain containing 3
231233_at	0.45553	0.0126	2.55121	-2.88553	0.255648	PCAT6	prostate cancer associated transcript 6 (non-protein coding)
205084_at	0.45553	0.0126	2.55023	-2.88759	0.604725	BCAP29	B-cell receptor-associated protein 29
203553_s_at	0.45553	0.0126	2.55013	-2.88781	0.483459	MAP4K5	mitogen-activated protein kinase kinase kinase kinase 5
221189_s_at	0.45553	0.0126	2.54987	-2.88835	0.244691	MIR6878///TARS2	microRNA 6878///threonyl-tRNA synthetase 2, mitochondrial (putative)
1569857_s_at	0.45553	0.0126	2.54986	-2.88838	0.411165	TPP2	tripeptidyl peptidase 2
217631_at	0.45553	0.0126	2.54971	-2.88868	0.271016	GTPBP4	GTP binding protein 4
201064_s_at	0.45553	0.0126	2.54954	-2.88905	0.477772	LOC100996696///PABPC4	polyadenylate-binding protein 4 pseudogene///poly(A) binding protein cytoplasmic 4
244667_at	0.45553	0.0127	2.54909	-2.88999	0.58126	PRCAT47	prostate cancer-associated 47
1560418_at	0.45553	0.0127	2.54862	-2.89098	0.157055	CEP57L1	centrosomal protein 57 like 1
1554885_a_at	0.45553	0.0127	2.54857	-2.89108	0.651734	PRIM2B///PRIM2	primase (DNA) subunit 2 pseudogene///primase (DNA) subunit 2
221510_s_at	0.45553	0.0127	2.54797	-2.89234	0.412032	GLS	glutaminase
232182_at	0.45553	0.0127	-2.54748	-2.89336	-0.479611	LOC286272	uncharacterized LOC286272
207668_x_at	0.45553	0.0127	2.54743	-2.89348	0.388206	PDIA6	protein disulfide isomerase family A member 6
207400_at	0.45553	0.0127	-2.54725	-2.89386	-0.546598	NPY5R	neuropeptide Y receptor Y5
234584_s_at	0.45553	0.0127	2.54699	-2.89439	0.29022	ATE1	arginyltransferase 1
219109_at	0.45553	0.0127	2.54695	-2.89449	0.488913	SPAG16	sperm associated antigen 16
223811_s_at	0.45553	0.0127	2.54689	-2.8946	0.378097	GET4///SUN1	golgi to ER traffic protein 4///Sad1 and UNC84 domain containing 1
238347_at	0.45553	0.0127	2.54688	-2.89463	0.299936	SLC38A10	solute carrier family 38 member 10
214631_at	0.45553	0.0127	2.54656	-2.8953	0.315345	ZBTB33	zinc finger and BTB domain containing 33
206779_s_at	0.45553	0.0127	2.54653	-2.89538	0.298058	ASMT	acetylserotonin O-methyltransferase
203202_at	0.45553	0.0127	2.54646	-2.89552	0.471755	KRR1	KRR1, small subunit processome component homolog
1554793_at	0.455578	0.0128	2.54617	-2.89612	0.162036	UBE3C	ubiquitin protein ligase E3C
228311_at	0.455708	0.0128	-2.54575	-2.897	-0.283445	BCL6B	B-cell CLL/lymphoma 6B
1560503_a_at	0.455708	0.0128	2.54557	-2.89738	0.512376	TFAP2A-AS1	TFAP2A antisense RNA 1
201761_at	0.456241	0.0128	2.54488	-2.89882	0.514609	MTHFD2	methylenetetrahydrofolate dehydrogenase (NADP+ dependent) 2, methenyltetrahydrofolate cyclohydrolase
218598_at	0.456485	0.0128	2.54443	-2.89976	0.464462	RINT1	RAD50 interactor 1
201559_s_at	0.456866	0.0128	2.54387	-2.90094	0.968939	CLIC4	chloride intracellular channel 4
224931_at	0.457134	0.0129	-2.54291	-2.90297	-0.265651	SLC41A3	solute carrier family 41 member 3
201475_x_at	0.457134	0.0129	2.54278	-2.90324	0.316954	MIR6758///MARS	microRNA 6758///methionyl-tRNA synthetase
218070_s_at	0.457134	0.0129	2.54273	-2.90333	0.276397	GMPPA	GDP-mannose pyrophosphorylase A
216178_x_at	0.457134	0.0129	2.54257	-2.90368	0.244263	ITGB1	integrin subunit beta 1
223453_s_at	0.457134	0.0129	2.54243	-2.90398	0.301476	ATL3	atlastin GTPase 3
214719_at	0.4611	0.013	-2.53888	-2.91141	-0.271192	SLC46A3	solute carrier family 46 member 3
215848_at	0.4611	0.013	-2.53867	-2.91184	-0.367649	SCAPER	S-phase cyclin A associated protein in the ER
203015_s_at	0.46118	0.013	2.53824	-2.91276	0.467253	SSX2IP	SSX family member 2 interacting protein
205804_s_at	0.46118	0.013	-2.53812	-2.91301	-0.534623	TRAF3IP3	TRAF3 interacting protein 3
212306_at	0.461505	0.013	2.53761	-2.91408	0.387911	CLASP2	cytoplasmic linker associated protein 2
241383_at	0.461511	0.0131	2.53706	-2.91521	0.256884	ZNF385C	zinc finger protein 385C
200729_s_at	0.461511	0.0131	2.5366	-2.91619	0.423846	ACTR2	ARP2 actin related protein 2 homolog
226480_at	0.461511	0.0131	-2.53654	-2.91631	-0.373759
244430_at	0.461511	0.0131	-2.53617	-2.91708	-0.222718	PLD6	phospholipase D family member 6
204407_at	0.461511	0.0131	2.53542	-2.91865	0.430997	TTF2	transcription termination factor 2
1563685_at	0.461511	0.0131	-2.5351	-2.91933	-0.325163	LOC285422	uncharacterized LOC285422
204353_s_at	0.461511	0.0131	2.5348	-2.91994	0.49404	POT1	protection of telomeres 1
210537_s_at	0.461511	0.0132	2.5345	-2.92058	0.366152	TADA2A	transcriptional adaptor 2A
233010_at	0.461511	0.0132	-2.5343	-2.92099	-0.345683
1557242_at	0.461511	0.0132	-2.5342	-2.92119	-0.376499
203032_s_at	0.461511	0.0132	2.53411	-2.92139	0.662855	FH	fumarate hydratase
202576_s_at	0.461511	0.0132	2.53399	-2.92163	0.268492	DDX19A///DDX19B	DEAD-box helicase 19A///DEAD-box helicase 19B
205247_at	0.461511	0.0132	-2.53382	-2.922	-0.321423	NOTCH4	notch 4
224333_s_at	0.461511	0.0132	2.53374	-2.92216	0.244219	MRPS5	mitochondrial ribosomal protein S5
208701_at	0.461511	0.0132	2.53356	-2.92253	0.427931	APLP2	amyloid beta precursor like protein 2
228364_at	0.461511	0.0132	-2.53342	-2.92282	-0.254887	ZNF784	zinc finger protein 784
205938_at	0.461511	0.0132	2.53335	-2.92298	0.566872	PPM1E	protein phosphatase, Mg2+/Mn2+ dependent 1E
209863_s_at	0.461511	0.0132	2.53322	-2.92325	1.13099	TP63	tumor protein p63
236226_at	0.462217	0.0132	-2.5324	-2.92496	-0.553495	BTLA	B and T lymphocyte associated
1560049_at	0.462352	0.0133	-2.53146	-2.92694	-0.372812
202523_s_at	0.462352	0.0133	-2.53142	-2.92702	-0.601036	SPOCK2	sparc/osteonectin, cwcv and kazal-like domains proteoglycan (testican) 2
230601_s_at	0.462352	0.0133	2.53099	-2.92791	0.284136	LRRC46	leucine rich repeat containing 46
217881_s_at	0.462352	0.0133	2.53068	-2.92857	0.546712	CDC27	cell division cycle 27
211404_s_at	0.462352	0.0133	2.53044	-2.92907	0.489217	APLP2	amyloid beta precursor like protein 2
238335_at	0.462352	0.0133	2.53031	-2.92934	0.518645	DNAJC21	DnaJ heat shock protein family (Hsp40) member C21
208744_x_at	0.462352	0.0133	2.53002	-2.92995	0.642344	HSPH1	heat shock protein family H (Hsp110) member 1
226571_s_at	0.462352	0.0133	-2.52991	-2.93017	-0.433198	PTPRS	protein tyrosine phosphatase, receptor type S
231791_at	0.462352	0.0133	2.52987	-2.93025	0.332169	ASAH2B	N-acylsphingosine amidohydrolase 2B
210983_s_at	0.462352	0.0133	2.52985	-2.9303	0.570009	MCM7	minichromosome maintenance complex component 7
210982_s_at	0.462352	0.0133	-2.52964	-2.93074	-0.340259	HLA-DRA	major histocompatibility complex, class II, DR alpha
203068_at	0.462593	0.0134	2.52899	-2.9321	0.469704	KLHL21	kelch like family member 21
210113_s_at	0.462593	0.0134	-2.52896	-2.93215	-0.37249	NLRP1	NLR family pyrin domain containing 1
242676_at	0.462832	0.0134	-2.52814	-2.93387	-0.398291	NDUFV2-AS1	NDUFV2 antisense RNA 1
243181_at	0.462832	0.0134	2.52805	-2.93405	0.205727	ANKIB1	ankyrin repeat and IBR domain containing 1
240840_s_at	0.462832	0.0134	2.52804	-2.93406	0.356374	SETD9	SET domain containing 9
208853_s_at	0.462955	0.0134	2.5277	-2.93478	0.646166	CANX	calnexin
204521_at	0.463644	0.0134	2.52684	-2.93658	0.560904	FAM216A	family with sequence similarity 216 member A
205196_s_at	0.463644	0.0134	2.52652	-2.93725	0.472581	AP1S1	adaptor related protein complex 1 sigma 1 subunit
220060_s_at	0.463644	0.0134	2.52636	-2.93758	0.66902	PARPBP	PARP1 binding protein
239205_s_at	0.463644	0.0135	-2.52559	-2.93918	-0.690151	CR1L///CR1	complement component 3b/4b receptor 1-like///complement component 3b/4b receptor 1 (Knops blood group)
202453_s_at	0.463644	0.0135	2.52551	-2.93935	0.397293	GTF2H1	general transcription factor IIH subunit 1
211762_s_at	0.463644	0.0135	2.52549	-2.93938	0.449954	KPNA2	karyopherin subunit alpha 2
201682_at	0.463644	0.0135	2.52546	-2.93944	0.329936	PMPCB	peptidase, mitochondrial processing beta subunit
AFFX-M27830_M_at	0.464046	0.0135	2.52488	-2.94067	0.612842
223038_s_at	0.464046	0.0135	2.52466	-2.94112	0.826623	FAM60A	family with sequence similarity 60 member A
223094_s_at	0.464352	0.0135	2.52417	-2.94214	0.526415	ANKH	ANKH inorganic pyrophosphate transport regulator
223100_s_at	0.46492	0.0136	2.523	-2.94459	0.263837	NUDT5	nudix hydrolase 5
1554509_a_at	0.46492	0.0136	2.52275	-2.9451	0.355837	FAM188A	family with sequence similarity 188 member A
1554408_a_at	0.46492	0.0136	2.52265	-2.9453	0.625561	TK1	thymidine kinase 1
221027_s_at	0.46492	0.0136	2.52253	-2.94556	0.554624	PLA2G12A	phospholipase A2 group XIIA
235280_at	0.46492	0.0136	2.52252	-2.94559	0.300684	POLR1A	RNA polymerase I subunit A
217010_s_at	0.464921	0.0136	2.52228	-2.94609	0.405779	CDC25C	cell division cycle 25C
230689_at	0.465211	0.0136	-2.52169	-2.94731	-0.606589
200910_at	0.465211	0.0136	2.52148	-2.94775	0.332785	LOC101927137///CCT3	uncharacterized LOC101927137///chaperonin containing TCP1 subunit 3
216587_s_at	0.465211	0.0136	-2.52131	-2.9481	-0.216187	MIR4683///FZD8	microRNA 4683///frizzled class receptor 8
222644_s_at	0.465211	0.0136	2.52109	-2.94856	0.365268	COLGALT1	collagen beta(1-O)galactosyltransferase 1
209722_s_at	0.465551	0.0137	2.52034	-2.95012	0.66171	SERPINB9	serpin family B member 9
216554_s_at	0.465551	0.0137	2.52029	-2.95022	0.406105	ENO1	enolase 1
211084_x_at	0.465551	0.0137	2.52005	-2.95073	0.512206	PRKD3	protein kinase D3
201199_s_at	0.465551	0.0137	2.51987	-2.9511	0.264621	PSMD1	proteasome 26S subunit, non-ATPase 1
204820_s_at	0.465659	0.0137	-2.51933	-2.95222	-0.476533	BTN3A2///BTN3A3	butyrophilin subfamily 3 member A2///butyrophilin subfamily 3 member A3
236266_at	0.465659	0.0137	-2.51923	-2.95244	-0.600016	RORA	RAR related orphan receptor A
209231_s_at	0.465659	0.0137	2.51907	-2.95276	0.576031	DCTN5	dynactin subunit 5
235461_at	0.466091	0.0137	2.51848	-2.95399	0.219919	TET2	tet methylcytosine dioxygenase 2
219773_at	0.466372	0.0137	2.51802	-2.95496	0.524062	NOX4	NADPH oxidase 4
1553280_at	0.466386	0.0138	2.51777	-2.95547	0.737273	PUS10	pseudouridylate synthase 10
222404_x_at	0.467133	0.0138	2.51693	-2.95722	0.558337	HACD3	3-hydroxyacyl-CoA dehydratase 3
231204_at	0.468468	0.0138	2.51561	-2.95997	0.192843	ZGRF1	zinc finger GRF-type containing 1
201856_s_at	0.468691	0.0139	2.51478	-2.96168	0.558089	ZFR	zinc finger RNA binding protein
232965_at	0.468691	0.0139	2.51473	-2.9618	0.427305	LOC400684	uncharacterized LOC400684
212882_at	0.468691	0.0139	2.51465	-2.96196	0.248419	KLHL18	kelch like family member 18
210458_s_at	0.468691	0.0139	2.51407	-2.96316	0.608018	TANK	TRAF family member associated NFKB activator
1555167_s_at	0.468691	0.0139	2.51395	-2.96341	0.547541	NAMPT	nicotinamide phosphoribosyltransferase
208852_s_at	0.468691	0.0139	2.51395	-2.96341	0.56832	CANX	calnexin
208813_at	0.468691	0.0139	2.51378	-2.96377	0.313738	GOT1	glutamic-oxaloacetic transaminase 1
231692_at	0.468871	0.0139	-2.5134	-2.96456	-0.198826	PIGG	phosphatidylinositol glycan anchor biosynthesis class G
225901_at	0.469746	0.0139	2.51232	-2.96679	0.378363	PTPMT1	protein tyrosine phosphatase, mitochondrial 1
221640_s_at	0.469746	0.014	2.51222	-2.967	0.410762	PIDD1	p53-induced death domain protein 1
200722_s_at	0.469867	0.014	2.51157	-2.96836	0.532481	CAPRIN1	cell cycle associated protein 1
235582_at	0.469867	0.014	2.51128	-2.96895	0.237195	E2F2	E2F transcription factor 2
220668_s_at	0.469867	0.014	2.51116	-2.9692	0.295352	DNMT3B	DNA methyltransferase 3 beta
204777_s_at	0.469867	0.014	-2.51109	-2.96936	-0.999016	MAL	mal, T-cell differentiation protein
219408_at	0.469867	0.014	2.51095	-2.96964	0.407865	PRMT7	protein arginine methyltransferase 7
228099_at	0.470741	0.014	-2.50991	-2.9718	-0.446776	ZNF550	zinc finger protein 550
1569603_at	0.470741	0.014	-2.50978	-2.97208	-0.196258
211530_x_at	0.471083	0.0141	-2.50916	-2.97335	-0.254326	HLA-G	major histocompatibility complex, class I, G
205598_at	0.471083	0.0141	2.50872	-2.97426	0.334429	TRAIP	TRAF interacting protein
1561059_a_at	0.471083	0.0141	-2.50869	-2.97433	-0.176393	LINC00691	long intergenic non-protein coding RNA 691
219990_at	0.471083	0.0141	2.50857	-2.97459	0.874032	E2F8	E2F transcription factor 8
227545_at	0.471515	0.0141	2.50798	-2.97579	0.627942	BARD1	BRCA1 associated RING domain 1
239219_at	0.471536	0.0141	2.50773	-2.97631	0.279278	AURKB	aurora kinase B
211851_x_at	0.471769	0.0141	2.50731	-2.97718	0.408426	BRCA1	BRCA1, DNA repair associated
214686_at	0.471939	0.0141	-2.50694	-2.97795	-0.410294	ZNF266	zinc finger protein 266
200829_x_at	0.472015	0.0142	2.50664	-2.97857	0.211852	ZNF207	zinc finger protein 207
221677_s_at	0.472015	0.0142	2.50642	-2.97904	0.667026	DONSON	downstream neighbor of SON
226174_at	0.472356	0.0142	2.50591	-2.98009	0.463613	USP42	ubiquitin specific peptidase 42
239625_at	0.47238	0.0142	2.50566	-2.98061	0.186088
206337_at	0.473015	0.0142	-2.50487	-2.98224	-0.755394	CCR7	C-C motif chemokine receptor 7
1552701_a_at	0.473015	0.0142	-2.50468	-2.98263	-0.639473	CARD16	caspase recruitment domain family member 16
218455_at	0.473946	0.0143	2.5037	-2.98467	0.300132	NFS1	NFS1 cysteine desulfurase
206106_at	0.474118	0.0143	2.50319	-2.98572	0.384758	MAPK12	mitogen-activated protein kinase 12
220688_s_at	0.474118	0.0143	2.5031	-2.98591	0.35468	MRTO4	MRT4 homolog, ribosome maturation factor
232084_at	0.474517	0.0143	2.50254	-2.98706	0.222055	SGTB	small glutamine rich tetratricopeptide repeat containing beta
226017_at	0.474633	0.0143	-2.50222	-2.98773	-0.566024	CMTM7	CKLF like MARVEL transmembrane domain containing 7
201056_at	0.474639	0.0143	-2.50198	-2.98822	-0.419527	GOLGB1	golgin B1
235528_at	0.475084	0.0144	-2.50133	-2.98957	-0.269071	GUCA1B	guanylate cyclase activator 1B
224713_at	0.475084	0.0144	2.50116	-2.98991	0.348875	NIFK	nucleolar protein interacting with the FHA domain of MKI67
225251_at	0.475093	0.0144	-2.50076	-2.99074	-0.308048	RAB24	RAB24, member RAS oncogene family
233183_at	0.475093	0.0144	-2.50069	-2.99088	-0.17348	SLC4A9	solute carrier family 4 member 9
204423_at	0.475344	0.0144	2.50026	-2.99178	0.376922	MKLN1	muskelin 1
1559902_at	0.475595	0.0144	2.49967	-2.99301	0.205842	MKL1	megakaryoblastic leukemia (translocation) 1
209141_at	0.475595	0.0144	2.4996	-2.99315	0.417125	UBE2G1	ubiquitin conjugating enzyme E2 G1
1557217_a_at	0.475887	0.0144	2.49914	-2.99411	0.378634	FANCB	Fanconi anemia complementation group B
208896_at	0.475892	0.0145	2.49842	-2.99559	0.445904	DDX18	DEAD-box helicase 18
217925_s_at	0.475892	0.0145	-2.4983	-2.99584	-0.246016	C6orf106	chromosome 6 open reading frame 106
1554478_a_at	0.475892	0.0145	2.49829	-2.99585	0.550744	HEATR3	HEAT repeat containing 3
1554582_a_at	0.475892	0.0145	2.49821	-2.99602	0.296764	ETFBKMT	electron transfer flavoprotein beta subunit lysine methyltransferase
228168_at	0.475949	0.0145	2.49784	-2.99679	0.251881	ATP5G3	ATP synthase, H+ transporting, mitochondrial Fo complex subunit C3 (subunit 9)
207855_s_at	0.475949	0.0145	2.49754	-2.99741	0.441007	CLCC1	chloride channel CLIC like 1
214161_at	0.475949	0.0145	2.49748	-2.99753	0.275904	OSGIN2	oxidative stress induced growth inhibitor family member 2
209310_s_at	0.47595	0.0145	-2.49725	-2.99801	-0.45738	CASP4	caspase 4
215152_at	0.476048	0.0145	-2.49694	-2.99865	-0.154065	MYB	MYB proto-oncogene, transcription factor
242749_at	0.476167	0.0145	-2.49642	-2.99972	-0.261462
229348_at	0.476167	0.0145	-2.49639	-2.99979	-0.238718	UBIAD1	UbiA prenyltransferase domain containing 1
235133_at	0.476444	0.0146	-2.49593	-3.00072	-0.790075	ZDHHC14	zinc finger DHHC-type containing 14
201504_s_at	0.476714	0.0146	2.49549	-3.00164	0.464123	TSN	translin
201446_s_at	0.476985	0.0146	2.49504	-3.00256	0.495136	TIA1	TIA1 cytotoxic granule-associated RNA binding protein
235181_at	0.477103	0.0146	2.49406	-3.00459	0.242271	TYW5	tRNA-yW synthesizing protein 5
219731_at	0.477103	0.0146	2.49383	-3.00507	0.284323	ENTPD1-AS1	ENTPD1 antisense RNA 1
207988_s_at	0.477103	0.0146	2.49376	-3.00522	0.247667	ARPC2	actin related protein 2/3 complex subunit 2
239281_at	0.477103	0.0147	-2.49355	-3.00564	-0.295265	ZDHHC14	zinc finger DHHC-type containing 14
207508_at	0.477103	0.0147	2.49348	-3.00578	0.314299	ATP5G3	ATP synthase, H+ transporting, mitochondrial Fo complex subunit C3 (subunit 9)
212058_at	0.477103	0.0147	2.49339	-3.00598	0.331945	U2SURP	U2 snRNP associated SURP domain containing
220351_at	0.477103	0.0147	-2.49286	-3.00706	-0.729887	ACKR4	atypical chemokine receptor 4
205214_at	0.477103	0.0147	2.49219	-3.00844	0.574188	STK17B	serine/threonine kinase 17b
242682_at	0.477103	0.0147	2.49195	-3.00894	0.169634
225091_at	0.477103	0.0147	-2.4919	-3.00904	-0.27101	ZCCHC3	zinc finger CCHC-type containing 3
235486_at	0.477103	0.0147	2.49173	-3.00939	0.885253	KIAA1549L	KIAA1549 like
1563166_at	0.477103	0.0147	-2.49147	-3.00994	-0.236799
218568_at	0.477103	0.0147	2.49142	-3.01004	0.473251	AGK	acylglycerol kinase
1553122_s_at	0.477103	0.0147	2.49126	-3.01036	0.51135	RBAK	RB associated KRAB zinc finger
201954_at	0.477103	0.0147	2.49121	-3.01046	0.345647	ARPC1B	actin related protein 2/3 complex subunit 1B
232077_s_at	0.477103	0.0147	-2.49115	-3.0106	-0.424594	YPEL3	yippee like 3
242783_at	0.477103	0.0148	-2.49093	-3.01105	-0.303534
214687_x_at	0.477103	0.0148	2.49035	-3.01223	0.390198	ALDOA	aldolase, fructose-bisphosphate A
214435_x_at	0.477103	0.0148	2.49032	-3.01231	0.645832	RALA	RALA Ras like proto-oncogene A
220631_at	0.477103	0.0148	2.49031	-3.01233	0.305138	OSGEPL1	O-sialoglycoprotein endopeptidase-like 1
216515_x_at	0.477103	0.0148	2.48987	-3.01323	0.163738	MIR1244-3	microRNA 1244-3
208502_s_at	0.477103	0.0148	2.48981	-3.01334	0.987396	PITX1	paired like homeodomain 1
212894_at	0.477103	0.0148	2.48959	-3.01381	0.311678	SUPV3L1	Suv3 like RNA helicase
218805_at	0.477103	0.0148	-2.48946	-3.01406	-0.731173	GIMAP1-GIMAP5///GIMAP5	GIMAP1-GIMAP5 readthrough///GTPase, IMAP family member 5
217503_at	0.477103	0.0148	2.48927	-3.01446	0.599468	STK17B	serine/threonine kinase 17b
209853_s_at	0.477948	0.0149	2.48837	-3.01632	0.350706	PSME3	proteasome activator subunit 3
222848_at	0.478144	0.0149	2.48774	-3.01761	0.741038	CENPK	centromere protein K
214737_x_at	0.478144	0.0149	2.48766	-3.01779	0.217417	HNRNPC	heterogeneous nuclear ribonucleoprotein C (C1/C2)
230834_at	0.478144	0.0149	-2.48754	-3.01803	-0.356941
205411_at	0.478761	0.0149	2.48667	-3.01982	0.417628	STK4	serine/threonine kinase 4
208944_at	0.478761	0.0149	-2.48634	-3.02049	-0.480546	TGFBR2	transforming growth factor beta receptor 2
204348_s_at	0.478761	0.0149	2.48605	-3.02109	0.759615	LOC100507855///AK4	adenylate kinase 4, mitochondrial-like///adenylate kinase 4
219472_at	0.478761	0.0149	2.486	-3.02119	0.200734	CENPO	centromere protein O
205025_at	0.478761	0.0149	2.48592	-3.02137	0.409963	ZBTB48	zinc finger and BTB domain containing 48
203093_s_at	0.478974	0.015	2.48552	-3.02218	0.339687	TIMM44	translocase of inner mitochondrial membrane 44
207939_x_at	0.480135	0.015	2.48437	-3.02455	0.262802	RNPS1	RNA binding protein with serine rich domain 1
220239_at	0.480509	0.015	2.48377	-3.02579	0.719806	KLHL7	kelch like family member 7
214804_at	0.480509	0.015	2.48357	-3.0262	0.688643	CENPI	centromere protein I
204026_s_at	0.480509	0.0151	2.48325	-3.02684	0.618948	ZWINT	ZW10 interacting kinetochore protein
222470_s_at	0.480509	0.0151	2.48317	-3.02701	0.406123	UQCC1	ubiquinol-cytochrome c reductase complex assembly factor 1
202141_s_at	0.480521	0.0151	2.48291	-3.02756	0.276581	COPS8	COP9 signalosome subunit 8
243006_at	0.480521	0.0151	-2.48239	-3.02861	-0.518407	FYN	FYN proto-oncogene, Src family tyrosine kinase
214054_at	0.480521	0.0151	-2.48212	-3.02918	-0.482806	DOK2	docking protein 2
232083_at	0.480521	0.0151	2.48199	-3.02945	0.252449	KIF16B	kinesin family member 16B
220296_at	0.480521	0.0151	-2.48178	-3.02987	-0.369101
1552625_a_at	0.480521	0.0151	2.48162	-3.03021	0.456202	TRNT1	tRNA nucleotidyl transferase 1
217485_x_at	0.480521	0.0151	2.4816	-3.03024	0.355201	PMS2P1	PMS1 homolog 2, mismatch repair system component pseudogene 1
38241_at	0.481476	0.0152	-2.48062	-3.03227	-0.514749	BTN3A3	butyrophilin subfamily 3 member A3
222305_at	0.481731	0.0152	2.48001	-3.0335	0.291751	HK2	hexokinase 2
229205_at	0.481731	0.0152	-2.47997	-3.0336	-0.678514	ZNF793-AS1	ZNF793 antisense RNA 1 (head to head)
221703_at	0.481901	0.0152	2.47961	-3.03434	0.776683	BRIP1	BRCA1 interacting protein C-terminal helicase 1
213958_at	0.482784	0.0152	-2.47865	-3.0363	-0.465167	CD6	CD6 molecule
1562387_at	0.482784	0.0153	2.47819	-3.03725	0.166333	C5orf42	chromosome 5 open reading frame 42
203536_s_at	0.482784	0.0153	2.47784	-3.03795	0.245535	CIAO1	cytosolic iron-sulfur assembly component 1
219597_s_at	0.482784	0.0153	2.47761	-3.03843	0.201503	DUOX1	dual oxidase 1
217957_at	0.482784	0.0153	2.47747	-3.03872	0.286277	CFAP20	cilia and flagella associated protein 20
236072_at	0.482784	0.0153	-2.47724	-3.0392	-0.398577
222757_s_at	0.482784	0.0153	2.47708	-3.03952	0.457751	ZAK	sterile alpha motif and leucine zipper containing kinase AZK
207772_s_at	0.482784	0.0153	-2.47706	-3.03957	-0.219107	PRMT8	protein arginine methyltransferase 8
204169_at	0.482784	0.0153	2.47648	-3.04075	0.262758	IMPDH1	inosine monophosphate dehydrogenase 1
238321_at	0.482784	0.0153	-2.47611	-3.04151	-0.199381	CD37	CD37 molecule
208696_at	0.482784	0.0153	2.47594	-3.04187	0.263727	CCT5	chaperonin containing TCP1 subunit 5
202278_s_at	0.482784	0.0153	2.47587	-3.04201	0.381087	SPTLC1	serine palmitoyltransferase long chain base subunit 1
202674_s_at	0.482784	0.0153	2.47577	-3.04222	0.289532	LMO7	LIM domain 7
211990_at	0.482784	0.0154	-2.47568	-3.04239	-0.312377	HLA-DPA1	major histocompatibility complex, class II, DP alpha 1
244563_at	0.482784	0.0154	2.47558	-3.04261	0.600562	QSER1	glutamine and serine rich 1
218999_at	0.483049	0.0154	-2.47511	-3.04356	-0.431101	TMEM140	transmembrane protein 140
1552518_s_at	0.483049	0.0154	2.47492	-3.04395	0.203683	MTBP	MDM2 binding protein
208769_at	0.483434	0.0154	2.47431	-3.04521	0.402879	EIF4EBP2	eukaryotic translation initiation factor 4E binding protein 2
206039_at	0.483434	0.0154	-2.47413	-3.04558	-0.846217	RAB33A	RAB33A, member RAS oncogene family
229123_at	0.483434	0.0154	-2.47396	-3.04593	-0.480059	ZNF224	zinc finger protein 224
223609_at	0.483813	0.0155	-2.4732	-3.04747	-0.233764	ROPN1L	rhophilin associated tail protein 1 like
220329_s_at	0.483813	0.0155	2.47306	-3.04777	0.469275	RMND1	required for meiotic nuclear division 1 homolog
231285_at	0.483813	0.0155	2.47256	-3.04879	0.267055
240834_at	0.483813	0.0155	2.47242	-3.04907	0.329757	OTULIN	OTU deubiquitinase with linear linkage specificity
203210_s_at	0.483813	0.0155	2.47231	-3.0493	0.449487	RFC5	replication factor C subunit 5
219183_s_at	0.483813	0.0155	-2.4716	-3.05076	-0.37761	CYTH4	cytohesin 4
212411_at	0.483813	0.0155	2.47155	-3.05085	0.414843	IMP4	IMP4 homolog, U3 small nucleolar ribonucleoprotein
222565_s_at	0.483813	0.0155	2.47121	-3.05155	0.488489	PRKD3	protein kinase D3
239900_x_at	0.483813	0.0155	-2.47117	-3.05164	-0.258134
235713_at	0.483813	0.0155	2.47116	-3.05166	0.385916	ALKBH8	alkB homolog 8, tRNA methyltransferase
204109_s_at	0.483813	0.0155	2.47111	-3.05175	0.529518	NFYA	nuclear transcription factor Y subunit alpha
219785_s_at	0.483813	0.0155	2.47102	-3.05195	0.590191	C16orf95	chromosome 16 open reading frame 95
210776_x_at	0.484189	0.0156	2.4705	-3.05301	0.392405	TCF3	transcription factor 3
240665_at	0.484372	0.0156	-2.47013	-3.05376	-0.90316
1554636_at	0.484524	0.0156	-2.46979	-3.05446	-0.787669
238742_x_at	0.485081	0.0156	-2.46913	-3.05581	-0.342905	LOC102724362	uncharacterized LOC102724362
204317_at	0.48607	0.0157	2.46799	-3.05814	0.628852	TRMU///GTSE1	tRNA 5-methylaminomethyl-2-thiouridylate methyltransferase///G2 and S-phase expressed 1
232521_at	0.48607	0.0157	-2.46782	-3.05849	-0.586582	PCSK7	proprotein convertase subtilisin/kexin type 7
217960_s_at	0.48607	0.0157	2.46769	-3.05875	0.527951	TOMM22	translocase of outer mitochondrial membrane 22
202358_s_at	0.486155	0.0157	-2.46694	-3.06029	-0.289249	SNX19	sorting nexin 19
202268_s_at	0.486155	0.0157	2.46675	-3.06067	0.311259	NAE1	NEDD8 activating enzyme E1 subunit 1
234973_at	0.486155	0.0157	2.46667	-3.06083	0.500077	SLC38A5	solute carrier family 38 member 5
208458_at	0.486155	0.0157	-2.46643	-3.06133	-0.221289	SCNN1D	sodium channel epithelial 1 delta subunit
226442_at	0.486155	0.0157	-2.46641	-3.06137	-0.537428	ABTB1	ankyrin repeat and BTB domain containing 1
215318_at	0.486155	0.0157	-2.46632	-3.06157	-0.404626	MINOS1P1	mitochondrial inner membrane organizing system 1 pseudogene 1
238987_at	0.486204	0.0158	-2.46559	-3.06305	-0.701942	B4GALT1	beta-1,4-galactosyltransferase 1
1557100_s_at	0.486204	0.0158	2.46555	-3.06314	0.792782	HECTD1	HECT domain E3 ubiquitin protein ligase 1
213167_s_at	0.486204	0.0158	2.46551	-3.06322	0.396133	SLC5A3	solute carrier family 5 member 3
225639_at	0.486204	0.0158	2.46517	-3.0639	0.456448	SKAP2	src kinase associated phosphoprotein 2
226822_at	0.486204	0.0158	-2.46492	-3.06441	-0.328865	STOX2	storkhead box 2
229216_s_at	0.486204	0.0158	2.4646	-3.06507	0.290914
221563_at	0.486204	0.0158	2.46444	-3.06539	0.691594	DUSP10	dual specificity phosphatase 10
218156_s_at	0.486204	0.0158	2.46397	-3.06636	0.426702	TSR1	TSR1, ribosome maturation factor
218764_at	0.486204	0.0158	-2.46388	-3.06653	-0.572333	PRKCH	protein kinase C eta
1554096_a_at	0.486204	0.0158	2.46355	-3.06722	0.506699	RBM33	RNA binding motif protein 33
201742_x_at	0.486204	0.0158	2.46347	-3.06737	0.68829	SRSF1	serine and arginine rich splicing factor 1
225717_at	0.486204	0.0158	2.46346	-3.0674	0.563953	LNPK	lunapark, ER junction formation factor
210219_at	0.486204	0.0159	2.46331	-3.06771	0.328814	SP100	SP100 nuclear antigen
207764_s_at	0.486204	0.0159	2.46304	-3.06825	0.71821	HIPK3	homeodomain interacting protein kinase 3
1555910_at	0.486204	0.0159	2.46302	-3.0683	0.506861	PTCD2	pentatricopeptide repeat domain 2
201330_at	0.487325	0.0159	2.46156	-3.07128	0.27356	RARS	arginyl-tRNA synthetase
209753_s_at	0.487325	0.0159	2.46152	-3.07136	0.549862	TMPO	thymopoietin
217294_s_at	0.487325	0.0159	2.46148	-3.07143	0.633786	ENO1	enolase 1
215720_s_at	0.487828	0.016	2.46087	-3.07269	0.354343	NFYA	nuclear transcription factor Y subunit alpha
237277_at	0.488096	0.016	2.46044	-3.07356	0.178463
243699_at	0.489205	0.016	2.45935	-3.07579	0.310548	LOC100507006	uncharacterized LOC100507006
221440_s_at	0.489659	0.016	2.45878	-3.07696	0.325396	RBBP9	RB binding protein 9, serine hydrolase
242336_at	0.489994	0.0161	2.45814	-3.07826	0.536546	GSK3B	glycogen synthase kinase 3 beta
235354_s_at	0.489994	0.0161	2.45808	-3.07837	0.558942	RSRC1	arginine and serine rich coiled-coil 1
231538_at	0.490106	0.0161	2.45778	-3.07899	0.50675	C11orf1	chromosome 11 open reading frame 1
241704_x_at	0.491419	0.0162	-2.45599	-3.08263	-0.233728	ZNF320	zinc finger protein 320
225754_at	0.491419	0.0162	2.45588	-3.08286	0.483497	AP1G1	adaptor related protein complex 1 gamma 1 subunit
204738_s_at	0.491419	0.0162	2.45588	-3.08286	0.241471	KRIT1	KRIT1, ankyrin repeat containing
228163_at	0.491419	0.0162	-2.4554	-3.08384	-0.260244	ST6GALNAC4	ST6 N-acetylgalactosaminide alpha-2,6-sialyltransferase 4
200052_s_at	0.491419	0.0162	2.45508	-3.08449	0.373707	ILF2	interleukin enhancer binding factor 2
218658_s_at	0.491419	0.0162	2.45491	-3.08483	0.376525	ACTR8	ARP8 actin-related protein 8 homolog
225687_at	0.491419	0.0162	2.45486	-3.08494	0.776647	FAM83D	family with sequence similarity 83 member D
1555501_s_at	0.491419	0.0162	2.45486	-3.08494	0.451706	RSRC1	arginine and serine rich coiled-coil 1
227012_at	0.491419	0.0162	2.45477	-3.08512	0.427004	SLC25A40	solute carrier family 25 member 40
218069_at	0.491419	0.0162	2.4546	-3.08547	0.336807	DCTPP1	dCTP pyrophosphatase 1
219502_at	0.491435	0.0162	2.45431	-3.08605	0.584131	NEIL3	nei like DNA glycosylase 3
215493_x_at	0.491435	0.0162	-2.45392	-3.08685	-0.3035	BTN2A1	butyrophilin subfamily 2 member A1
202873_at	0.491435	0.0162	2.45389	-3.08691	0.56019	ATP6V1C1	ATPase H+ transporting V1 subunit C1
204448_s_at	0.491435	0.0163	2.4534	-3.0879	0.310767	PDCL	phosducin like
232583_at	0.491435	0.0163	-2.45339	-3.08792	-0.610165
201477_s_at	0.491435	0.0163	2.4533	-3.08811	0.488159	RRM1	ribonucleotide reductase catalytic subunit M1
218295_s_at	0.491876	0.0163	2.45274	-3.08925	0.435158	NUP50	nucleoporin 50
227059_at	0.49225	0.0163	2.45205	-3.09065	0.623532	GPC6	glypican 6
201953_at	0.49225	0.0163	-2.45168	-3.09141	-0.338041	CIB1	calcium and integrin binding 1
222736_s_at	0.49225	0.0163	2.45163	-3.09151	0.490962	TMEM38B	transmembrane protein 38B
218073_s_at	0.49225	0.0163	2.45159	-3.09159	0.592927	NDC1	NDC1 transmembrane nucleoporin
228370_at	0.492495	0.0164	-2.45099	-3.09281	-0.498838	LOC101930404///SNORD116-28///SNORD115-26///SNORD115-13///SNORD115-7///SNORD116-22///SNORD116-4///PWARSN///SNORD107///IPW	uncharacterized LOC101930404///small nucleolar RNA, C/D box 116-28///small nucleolar RNA, C/D box 115-26///small nucleolar RNA, C/D box 115-13///small nucleolar RNA, C/D box 115-7///small nucleolar RNA, C/D box 116-22///small nucleolar RNA, C/D box 116-4///Prader Willi/Angelman region RNA, SNRPN neighbor///small nucleolar RNA, C/D box 107///imprinted in Prader-Willi syndrome (non-protein coding)
204710_s_at	0.492495	0.0164	2.45094	-3.09291	0.334671	WIPI2	WD repeat domain, phosphoinositide interacting 2
219720_s_at	0.492495	0.0164	2.45063	-3.09354	0.282009	GPATCH2L	G-patch domain containing 2 like
220682_s_at	0.492495	0.0164	2.45055	-3.09371	0.471112	KLHL5	kelch like family member 5
1557602_at	0.492898	0.0164	2.45002	-3.09478	0.34171	LINC00870	long intergenic non-protein coding RNA 870
222538_s_at	0.493703	0.0164	2.44917	-3.0965	0.696876	APPL1	adaptor protein, phosphotyrosine interacting with PH domain and leucine zipper 1
233800_at	0.494172	0.0165	-2.44803	-3.09883	-0.320887
201867_s_at	0.494172	0.0165	2.44758	-3.09974	0.924071	TBL1X	transducin (beta)-like 1X-linked
225834_at	0.494172	0.0165	2.44744	-3.10003	0.750943	FAM72A///FAM72D///FAM72B///FAM72C	family with sequence similarity 72 member A///family with sequence similarity 72 member D///family with sequence similarity 72 member B///family with sequence similarity 72 member C
1567183_s_at	0.494172	0.0165	2.44718	-3.10056	0.325981	LOC105376944	uncharacterized LOC105376944
203711_s_at	0.494172	0.0165	2.44714	-3.10063	0.427362	HIBCH	3-hydroxyisobutyryl-CoA hydrolase
241758_at	0.494172	0.0165	-2.4471	-3.10071	-0.183863	NUP93	nucleoporin 93
214823_at	0.494172	0.0165	-2.4471	-3.10072	-0.321211	ZNF204P	zinc finger protein 204, pseudogene
224405_at	0.494172	0.0165	2.44692	-3.10107	0.764314	FCRL5	Fc receptor like 5
216303_s_at	0.494172	0.0165	2.4469	-3.10113	0.249077	MTMR1	myotubularin related protein 1
208644_at	0.494368	0.0166	2.44653	-3.10187	0.43336	PARP1	poly(ADP-ribose) polymerase 1
222403_at	0.494817	0.0166	2.44587	-3.10321	0.457207	MTCH2	mitochondrial carrier 2
201619_at	0.494817	0.0166	2.44575	-3.10345	0.313108	PRDX3	peroxiredoxin 3
1552322_at	0.494817	0.0166	2.44555	-3.10387	0.189444	FAM122C	family with sequence similarity 122C
205339_at	0.495988	0.0166	2.44442	-3.10616	0.594139	STIL	SCL/TAL1 interrupting locus
1554627_a_at	0.496252	0.0167	2.444	-3.107	0.413704	ASCC1	activating signal cointegrator 1 complex subunit 1
1560763_at	0.497748	0.0167	2.44262	-3.1098	0.3141
234764_x_at	0.497789	0.0167	-2.44231	-3.11043	-1.67947	IGLJ3///IGLV1-44///CKAP2///IGLV@///IGLC1	immunoglobulin lambda joining 3///immunoglobulin lambda variable 1-44///cytoskeleton associated protein 2///immunoglobulin lambda variable cluster///immunoglobulin lambda constant 1
231565_at	0.497789	0.0167	2.44217	-3.11072	0.661753	C4orf22	chromosome 4 open reading frame 22
207507_s_at	0.498927	0.0168	2.44075	-3.11359	0.334968	ATP5G3	ATP synthase, H+ transporting, mitochondrial Fo complex subunit C3 (subunit 9)
218894_s_at	0.498927	0.0168	2.44063	-3.11384	0.426239	MAGOHB	mago homolog B, exon junction complex core component
1557060_at	0.498927	0.0168	2.44044	-3.11421	0.665345	OVAAL	ovarian adenocarcinoma amplified long non-coding RNA
219205_at	0.498927	0.0168	2.44044	-3.11422	0.346666	SRR	serine racemase
219489_s_at	0.498952	0.0168	2.44021	-3.11469	0.542235	NXN	nucleoredoxin
231124_x_at	0.49927	0.0168	-2.43975	-3.11562	-0.570033	LY9	lymphocyte antigen 9
208840_s_at	0.499373	0.0169	2.43946	-3.1162	0.465092	G3BP2	G3BP stress granule assembly factor 2
215309_at	0.499673	0.0169	2.43902	-3.1171	0.134597	ZNF674	zinc finger protein 674
203092_at	0.499698	0.0169	2.43879	-3.11757	0.234165	TIMM44	translocase of inner mitochondrial membrane 44
218202_x_at	0.499804	0.0169	2.43833	-3.11849	0.390343	MRPL44	mitochondrial ribosomal protein L44
241356_at	0.499804	0.0169	-2.43825	-3.11866	-0.452595	SDR42E1	short chain dehydrogenase/reductase family 42E, member 1
219769_at	0.499804	0.0169	2.43808	-3.11901	0.281739	INCENP	inner centromere protein
240473_at	0.500659	0.017	-2.43714	-3.12089	-0.266463
222634_s_at	0.500659	0.017	2.4364	-3.12241	0.393362	TBL1XR1	transducin (beta)-like 1 X-linked receptor 1
201540_at	0.500659	0.017	-2.43621	-3.12278	-0.520176	FHL1	four and a half LIM domains 1
1564166_s_at	0.500659	0.017	2.43573	-3.12376	0.202149	LOC100630923	LOC100289561-PRKRIP1 readthrough
1564154_at	0.500659	0.017	-2.43544	-3.12434	-0.380958
226661_at	0.500659	0.017	2.43538	-3.12447	0.689418	CDCA2	cell division cycle associated 2
204957_at	0.500659	0.017	2.43537	-3.12449	0.442544	ORC5	origin recognition complex subunit 5
209041_s_at	0.500659	0.017	2.43533	-3.12456	0.477427	UBE2G2	ubiquitin conjugating enzyme E2 G2
1553639_a_at	0.500659	0.0171	2.43509	-3.12504	0.231436	PPARGC1B	PPARG coactivator 1 beta
242028_at	0.500659	0.0171	-2.43467	-3.12589	-0.539087	ZNF709	zinc finger protein 709
204234_s_at	0.500659	0.0171	2.43433	-3.12659	0.492735	ZNF195	zinc finger protein 195
222748_s_at	0.500659	0.0171	2.43358	-3.1281	0.558245	TXNL4B	thioredoxin like 4B
214008_at	0.500659	0.0171	2.43353	-3.1282	0.34531	TWF1	twinfilin actin binding protein 1
200778_s_at	0.500659	0.0171	2.4335	-3.12826	0.513385	2021-09-02	septin 2
221550_at	0.500659	0.0171	2.43322	-3.12883	0.45399	COX15	COX15, cytochrome c oxidase assembly homolog
221925_s_at	0.500659	0.0172	2.43263	-3.13001	0.311078	CSPP1	centrosome and spindle pole associated protein 1
213005_s_at	0.500659	0.0172	2.43238	-3.13052	0.852319	KANK1	KN motif and ankyrin repeat domains 1
1555274_a_at	0.500659	0.0172	2.43234	-3.13062	0.482514	EPT1	ethanolaminephosphotransferase 1
204525_at	0.500659	0.0172	2.43228	-3.13072	0.347743	PHF14	PHD finger protein 14
201303_at	0.500659	0.0172	2.43227	-3.13075	0.236801	EIF4A3	eukaryotic translation initiation factor 4A3
201241_at	0.500659	0.0172	2.43183	-3.13165	0.254386	DDX1	DEAD/H-box helicase 1
235549_at	0.500659	0.0172	2.43169	-3.13192	0.902749	RNF144B	ring finger protein 144B
238448_at	0.500659	0.0172	2.43167	-3.13197	0.425675	MRPL19	mitochondrial ribosomal protein L19
230060_at	0.500659	0.0172	2.43163	-3.13204	0.692281	CDCA7	cell division cycle associated 7
226386_at	0.500659	0.0172	2.43147	-3.13236	0.353798	MALSU1	mitochondrial assembly of ribosomal large subunit 1
215227_x_at	0.500659	0.0172	2.43142	-3.13246	0.275893	ACP1	acid phosphatase 1, soluble
214700_x_at	0.500659	0.0172	2.43142	-3.13246	0.494144	RIF1	replication timing regulatory factor 1
226945_at	0.500659	0.0172	2.43138	-3.13254	0.446113	RHBDD1	rhomboid domain containing 1
208941_s_at	0.500659	0.0172	2.43137	-3.13257	0.290212	SEPHS1	selenophosphate synthetase 1
228050_at	0.501031	0.0172	2.43087	-3.13357	0.520845	UTP15	UTP15, small subunit processome component
214959_s_at	0.501189	0.0173	2.42986	-3.13561	0.624954	API5	apoptosis inhibitor 5
224709_s_at	0.501189	0.0173	-2.42962	-3.1361	-0.302904	CDC42SE2	CDC42 small effector 2
1553984_s_at	0.501189	0.0173	2.42948	-3.13637	0.408708	DTYMK	deoxythymidylate kinase
232636_at	0.501189	0.0173	2.42947	-3.1364	0.374755	SLITRK4	SLIT and NTRK like family member 4
212685_s_at	0.501189	0.0173	2.42926	-3.13683	0.387724	TBL2	transducin (beta)-like 2
1560872_at	0.501189	0.0173	2.42902	-3.13732	0.230453
208641_s_at	0.501189	0.0173	2.42892	-3.13752	0.34795	RAC1	ras-related C3 botulinum toxin substrate 1 (rho family, small GTP binding protein Rac1)
229843_at	0.501189	0.0173	2.42872	-3.13791	0.735632	RMDN1	regulator of microtubule dynamics 1
235736_at	0.501189	0.0173	2.42871	-3.13795	0.527762	SMKR1	small lysine rich protein 1
1554878_a_at	0.501189	0.0173	2.42857	-3.13822	0.638897	ABCD3	ATP binding cassette subfamily D member 3
244400_at	0.501189	0.0173	-2.42835	-3.13867	-0.246297	VPS33A	VPS33A, CORVET/HOPS core subunit
202905_x_at	0.501189	0.0174	2.42828	-3.13881	0.474747	NBN	nibrin
201548_s_at	0.501852	0.0174	2.42756	-3.14027	0.421715	KDM5B	lysine demethylase 5B
219637_at	0.50204	0.0174	2.427	-3.14138	0.30716	ARMC9	armadillo repeat containing 9
225762_x_at	0.50204	0.0174	2.42691	-3.14156	0.946782	RNA45S5	RNA, 45S pre-ribosomal 5
204853_at	0.50204	0.0174	2.42655	-3.14229	0.400505	ORC2	origin recognition complex subunit 2
219950_s_at	0.50204	0.0174	2.42647	-3.14246	0.229654	TIAM2	T-cell lymphoma invasion and metastasis 2
241435_at	0.50204	0.0174	-2.42638	-3.14263	-0.767066
1557675_at	0.502329	0.0175	-2.42595	-3.1435	-0.34652	RAF1	Raf-1 proto-oncogene, serine/threonine kinase
213453_x_at	0.502455	0.0175	2.42551	-3.14439	0.269559	GAPDH	glyceraldehyde-3-phosphate dehydrogenase
228382_at	0.502455	0.0175	2.42545	-3.14452	0.356924	OTULIN	OTU deubiquitinase with linear linkage specificity
205392_s_at	0.502468	0.0175	-2.42523	-3.14495	-0.884415	CCL15-CCL14///CCL14	CCL15-CCL14 readthrough (NMD candidate)///C-C motif chemokine ligand 14
1554101_a_at	0.502928	0.0175	2.42465	-3.14612	0.47686	TMTC4	transmembrane and tetratricopeptide repeat containing 4
209795_at	0.502928	0.0175	-2.42446	-3.1465	-0.619245	CD69	CD69 molecule
231681_x_at	0.503062	0.0175	-2.42397	-3.14748	-0.285	HIST3H2A	histone cluster 3, H2a
203755_at	0.503062	0.0176	2.42358	-3.14828	0.651965	BUB1B	BUB1 mitotic checkpoint serine/threonine kinase B
210672_s_at	0.503062	0.0176	2.42347	-3.14849	0.390588	NPRL3	NPR3 like, GATOR1 complex subunit
219132_at	0.503062	0.0176	-2.42336	-3.14872	-0.535458	PELI2	pellino E3 ubiquitin protein ligase family member 2
1553066_at	0.503062	0.0176	-2.42334	-3.14876	-0.29477	TAAR9	trace amine associated receptor 9 (gene/pseudogene)
221756_at	0.503213	0.0176	-2.42302	-3.14941	-0.458414	PIK3IP1	phosphoinositide-3-kinase interacting protein 1
218901_at	0.504101	0.0176	-2.4218	-3.15185	-0.619493	PLSCR4	phospholipid scramblase 4
204391_x_at	0.504101	0.0176	2.42173	-3.15201	0.342614	TRIM24	tripartite motif containing 24
203625_x_at	0.504101	0.0176	2.42172	-3.15202	0.340097	SKP2	S-phase kinase-associated protein 2, E3 ubiquitin protein ligase
232912_at	0.50415	0.0177	2.42129	-3.15288	0.277161	GPR180	G protein-coupled receptor 180
235872_at	0.50415	0.0177	2.42113	-3.15321	0.323335	TERF2	telomeric repeat binding factor 2
1559946_s_at	0.50415	0.0177	2.42092	-3.15362	0.271444	RUVBL2	RuvB like AAA ATPase 2
204895_x_at	0.50415	0.0177	2.42087	-3.15374	0.175405	MUC4	mucin 4, cell surface associated
222890_at	0.504219	0.0177	2.42031	-3.15485	0.565924	CCDC113	coiled-coil domain containing 113
205190_at	0.504219	0.0177	2.41983	-3.15582	0.60403	PLS1	plastin 1
214240_at	0.504219	0.0178	-2.41937	-3.15674	-0.214995	GAL	galanin and GMAP prepropeptide
203944_x_at	0.504219	0.0178	-2.41918	-3.15713	-0.309979	BTN2A1	butyrophilin subfamily 2 member A1
1556301_at	0.504219	0.0178	2.41911	-3.15726	0.353313	LOC100287015	uncharacterized LOC100287015
243375_at	0.504219	0.0178	-2.41901	-3.15747	-0.300247
211318_s_at	0.504219	0.0178	2.41897	-3.15755	0.250161	RAE1	ribonucleic acid export 1
216640_s_at	0.504219	0.0178	2.41866	-3.15817	0.38077	PDIA6	protein disulfide isomerase family A member 6
235554_x_at	0.504219	0.0178	2.41857	-3.15836	0.387823	PACRGL	PARK2 coregulated like
241924_at	0.504219	0.0178	-2.41841	-3.15868	-0.415216
229376_at	0.504219	0.0178	-2.41829	-3.15893	-0.590727	PROX1	prospero homeobox 1
232307_at	0.504219	0.0178	-2.41827	-3.15896	-0.493374
209837_at	0.504219	0.0178	2.41818	-3.15915	0.326465	AP4M1	adaptor related protein complex 4 mu 1 subunit
220814_at	0.504621	0.0178	2.41752	-3.16047	0.278085	SLC30A6	solute carrier family 30 member 6
229484_at	0.504621	0.0178	-2.41746	-3.16059	-0.255144	PPM1J	protein phosphatase, Mg2+/Mn2+ dependent 1J
240600_at	0.505051	0.0179	-2.41683	-3.16186	-0.644836
235638_at	0.505051	0.0179	2.41658	-3.16236	1.6398	RASSF6	Ras association domain family member 6
223700_at	0.505051	0.0179	2.41652	-3.16247	0.898954	MND1	meiotic nuclear divisions 1
220083_x_at	0.505509	0.0179	2.41597	-3.16359	0.439532	UCHL5	ubiquitin C-terminal hydrolase L5
1555551_at	0.505975	0.0179	-2.4154	-3.16472	-0.162642	SERPINB5	serpin family B member 5
227789_at	0.506184	0.018	2.41504	-3.16545	0.275882
242935_at	0.506343	0.018	2.41472	-3.1661	0.304527	SBF2	SET binding factor 2
203947_at	0.506693	0.018	2.41423	-3.16709	0.246317	CSTF3	cleavage stimulation factor subunit 3
216392_s_at	0.506693	0.018	2.41404	-3.16745	0.556157	SEC23IP	SEC23 interacting protein
204113_at	0.506851	0.018	2.41345	-3.16863	0.538336	CELF1	CUGBP, Elav-like family member 1
1560979_a_at	0.506851	0.018	-2.41327	-3.16901	-0.18531
239250_at	0.506851	0.0181	-2.4126	-3.17035	-0.661998	ZNF542P	zinc finger protein 542, pseudogene
210216_x_at	0.506851	0.0181	2.41245	-3.17066	0.31478	RAD1	RAD1 checkpoint DNA exonuclease
227730_at	0.506851	0.0181	-2.41241	-3.17074	-0.318902	DYM	dymeclin
222250_s_at	0.506851	0.0181	2.41207	-3.1714	0.479278	INTS7	integrator complex subunit 7
207451_at	0.506851	0.0181	-2.41186	-3.17183	-0.205645	NKX2-8	NK2 homeobox 8
204482_at	0.506851	0.0181	-2.41168	-3.17219	-0.60581	CLDN5	claudin 5
215100_at	0.506851	0.0181	2.41168	-3.17219	0.372905	ADTRP	androgen dependent TFPI regulating protein
202872_at	0.506851	0.0181	2.4116	-3.17235	0.480615	ATP6V1C1	ATPase H+ transporting V1 subunit C1
239951_at	0.506851	0.0181	-2.41141	-3.17274	-0.444395
222572_at	0.506851	0.0181	-2.41134	-3.17287	-0.506695	PDP1	pyruvate dehyrogenase phosphatase catalytic subunit 1
202710_at	0.506851	0.0181	2.41131	-3.17293	0.469206	BET1	Bet1 golgi vesicular membrane trafficking protein
236609_at	0.507073	0.0181	2.41094	-3.17367	0.368079	PMS1	PMS1 homolog 1, mismatch repair system component
235953_at	0.507484	0.0182	-2.41011	-3.17534	-0.581893	ZNF610	zinc finger protein 610
230210_at	0.507484	0.0182	2.41007	-3.17541	0.238103	SUN1	Sad1 and UNC84 domain containing 1
1561277_at	0.507484	0.0182	2.40979	-3.17598	0.211432	LOC339298	uncharacterized LOC339298
210236_at	0.507484	0.0182	2.4097	-3.17616	0.3342	PPFIA1	PTPRF interacting protein alpha 1
1556806_at	0.507484	0.0182	-2.40935	-3.17686	-0.256547
203270_at	0.507484	0.0182	2.40916	-3.17724	0.420513	DTYMK	deoxythymidylate kinase
219043_s_at	0.507484	0.0182	2.40912	-3.17732	0.399246	PDCL3P4///PDCL3	phosducin-like 3 pseudogene 4///phosducin like 3
220726_at	0.507484	0.0182	-2.40878	-3.178	-0.137845
238443_at	0.507484	0.0183	2.40856	-3.17844	0.766091	TFAM	transcription factor A, mitochondrial
223085_at	0.507484	0.0183	-2.40856	-3.17845	-0.362184	RNF19A	ring finger protein 19A, RBR E3 ubiquitin protein ligase
240528_s_at	0.507484	0.0183	2.40813	-3.1793	0.717224	EXOC4	exocyst complex component 4
201739_at	0.507484	0.0183	2.4079	-3.17977	0.902865	SGK1	serum/glucocorticoid regulated kinase 1
217337_at	0.507484	0.0183	2.40768	-3.1802	0.208297
231437_at	0.507484	0.0183	-2.40751	-3.18055	-0.286251	SLC35D2	solute carrier family 35 member D2
231996_at	0.507484	0.0183	2.40746	-3.18066	0.708599	N4BP2	NEDD4 binding protein 2
209462_at	0.507484	0.0183	-2.40744	-3.1807	-0.287306	APLP1	amyloid beta precursor like protein 1
240103_at	0.507841	0.0183	2.40696	-3.18165	0.29549
207686_s_at	0.508757	0.0184	2.40595	-3.18366	0.712801	CASP8	caspase 8
243748_at	0.508757	0.0184	-2.40575	-3.18408	-0.355991
1556287_a_at	0.508757	0.0184	-2.40553	-3.1845	-0.170351
219999_at	0.508757	0.0184	-2.40545	-3.18468	-0.366486	MAN2A2	mannosidase alpha class 2A member 2
223091_x_at	0.508757	0.0184	2.40486	-3.18585	0.277863	MFF	mitochondrial fission factor
228905_at	0.508757	0.0184	-2.40477	-3.18604	-0.600508	PCM1	pericentriolar material 1
201450_s_at	0.508757	0.0184	2.40448	-3.18661	0.463323	TIA1	TIA1 cytotoxic granule-associated RNA binding protein
200723_s_at	0.508757	0.0185	2.40413	-3.18732	0.401556	CAPRIN1	cell cycle associated protein 1
205831_at	0.508757	0.0185	-2.40389	-3.18779	-0.616793	CD2	CD2 molecule
230743_at	0.508757	0.0185	-2.40363	-3.18831	-0.216559	HOXB-AS3	HOXB cluster antisense RNA 3
205450_at	0.508757	0.0185	2.40345	-3.18867	0.279276	PHKA1	phosphorylase kinase regulatory subunit alpha 1
212141_at	0.508757	0.0185	2.40337	-3.18884	0.567424	MCM4	minichromosome maintenance complex component 4
1554460_at	0.508757	0.0185	2.40312	-3.18933	0.313288	ST8SIA4	ST8 alpha-N-acetyl-neuraminide alpha-2,8-sialyltransferase 4
212568_s_at	0.508757	0.0185	2.40298	-3.18961	0.508636	DLAT	dihydrolipoamide S-acetyltransferase
220172_at	0.508757	0.0185	2.40284	-3.1899	0.599165	DCAF17	DDB1 and CUL4 associated factor 17
217895_at	0.508757	0.0185	2.40239	-3.19079	0.240611	PTCD3	pentatricopeptide repeat domain 3
230684_at	0.508757	0.0186	2.40211	-3.19135	0.224274	LOC101927446///GTPBP10	uncharacterized LOC101927446///GTP binding protein 10
213500_at	0.508757	0.0186	-2.40207	-3.19143	-0.296337
1553928_at	0.508757	0.0186	2.40203	-3.1915	0.486415	ELMOD2	ELMO domain containing 2
208688_x_at	0.508757	0.0186	2.40197	-3.19163	0.339037	EIF3B	eukaryotic translation initiation factor 3 subunit B
221258_s_at	0.508757	0.0186	2.40192	-3.19173	0.713392	KIF18A	kinesin family member 18A
1570292_at	0.508757	0.0186	-2.40166	-3.19225	-0.201597	LOC101927123	uncharacterized LOC101927123
224737_x_at	0.508757	0.0186	2.40165	-3.19227	0.346497	CCAR1	cell division cycle and apoptosis regulator 1
203315_at	0.508757	0.0186	-2.40127	-3.19302	-0.38098	NCK2	NCK adaptor protein 2
1556757_a_at	0.508757	0.0186	2.40097	-3.19363	0.149794	ALS2CR11	amyotrophic lateral sclerosis 2 chromosome region candidate 11
[truncated: 52,677 more rows]
